# Supplementary material for: A novel ilarvirus protein CP-RT is expressed via stop codon readthrough and suppresses RDR6-dependent RNA silencing
Source: PubMed Central journal article supplement (PMC11166343; doi:10.1371/journal.ppat.1012034), 2024-05-30
Supplement: ppat.1012034.s001.pdf [file ppat.1012034.s001.pdf]

# **A novel ilarvirus protein CP-RT is expressed via stop codon readthrough and suppresses RDR6-dependent RNA silencing**

Nina Lukhovitskaya<sup>1\*</sup>, Katherine Brown<sup>1</sup>, Lei Hua<sup>2</sup>, Adrienne E. Pate<sup>2</sup>, John P. Carr<sup>2</sup>  
and Andrew E. Firth<sup>1\*</sup>

Correspondence: nl358@cam.ac.uk (NL), aef24@cam.ac.uk (AEF)

<sup>1</sup>Department of Pathology, University of Cambridge, United Kingdom

<sup>2</sup>Department of Plant Sciences, University of Cambridge, United Kingdom

## **Supplementary Material**

**Supplementary Table A.** Readthrough statistics for the different clusters. Columns 1 and 2 show the cluster designation and the accession number of the reference sequence for the cluster, respectively. Column 3 indicates the apparent presence (Y) or absence (N) of a lengthy insert in RNA3 when the 3'-of-CP region was compared with the 3'UTRs of RNAs 1 and 2; we take presence of a lengthy insert as a proxy for the putative presence of a readthrough domain in that cluster; a "U" for clusters 26 and 32 indicates "unknown" due to the absence of appropriate RNA1/RNA2 sequence data. Column 4 shows the median length across the cluster of the ORF in-frame with and immediately 3'-adjacent to the CP stop codon, whether or not readthrough is hypothesised to occur in that cluster; ORFs that are incomplete as a result of running off the 3' end of the available RNA3 nucleotide sequence are excluded from the median calculation. Columns 5 and 6 show the identity of the CP stop codon, and the six 3'-adjacent nucleotides in the reference sequence (which is generally typical for the cluster, but see Supplementary Dataset C for data for all sequences in each cluster). Clusters are presented in descending order by column 4.

| <b>Cluster</b> | <b>Reference</b> | <b>Insert</b> | <b>Length</b> | <b>CP stop</b> | <b>Context</b> |
|----------------|------------------|---------------|---------------|----------------|----------------|
| <b>5a</b>      | NC_006568        | Y             | 111           | UAG            | CAAUUA         |
| <b>5b</b>      | MN527504         | Y             | 84            | UAG            | CAGUUA         |
| <b>35</b>      | NC_038776        | Y             | 60            | UGA            | CCACAC         |
| <b>34</b>      | OL964098         | Y             | 57            | UGA            | CCACAC         |
| <b>12</b>      | NC_005854        | Y             | 57            | UGA            | AUGGUU         |
| <b>4</b>       | NC_011555        | Y             | 49            | UGA            | CUGGUU         |
| <b>26</b>      | MN386958         | U             | 49            | UGA            | AUCGCG         |
| <b>8b</b>      | NC_003570        | Y             | 48            | UGA            | CUACAC         |
| <b>30</b>      | NC_022129        | Y             | 48            | UGA            | CUCACU         |
| <b>29</b>      | NC_027930        | Y             | 48            | UGA            | CUAGAU         |
| <b>14</b>      | NC_011807        | Y             | 48            | UGA            | CCACGC         |
| <b>37</b>      | NC_040437        | Y             | 46            | UGA            | CUACAC         |
| <b>36</b>      | MG800791         | Y             | 46            | UGA            | AAGGUU         |
| <b>11</b>      | NC_008706        | Y             | 46            | UGA            | CUGUCU         |
| <b>1</b>       | NC_003845        | Y             | 45            | UGA            | CUAGAU         |
| <b>10</b>      | OL472062         | Y             | 45            | UGA            | CGGUCA         |
| <b>25</b>      | OL539725         | Y             | 44            | UGA            | AGGUCA         |
| <b>20</b>      | OM323991         | Y             | 44            | UGA            | AGGUCC         |
| <b>16</b>      | OL584350         | Y             | 44            | UGA            | CUACUU         |
| <b>15</b>      | NC_040394        | Y             | 44            | UGA            | CUAUCU         |
| <b>8a</b>      | NC_009536        | Y             | 43            | UGA            | CUACAC         |
| <b>27</b>      | MZ170698         | Y             | 42            | UGA            | CUACAC         |
| <b>33</b>      | OL472059         | Y             | 41            | UGA            | CCACGC         |
| <b>17a</b>     | NC_003835        | Y             | 41            | UGA            | CUACAC         |
| <b>17b</b>     | NC_039076        | Y             | 39            | UGA            | CCACGC         |
| <b>13</b>      | NC_003810        | Y             | 39            | UGA            | CUACAC         |
| <b>3</b>       | NC_008038        | Y             | 38            | UGA            | CUAUAU         |
| <b>23</b>      | KX196164         | Y             | 38            | UGA            | CUAUAU         |
| <b>18</b>      | NC_003546        | Y             | 37            | UGA            | CCACAA         |
| <b>21</b>      | MW962375         | N             | 35            | UAG            | GUUGGG         |
| <b>6b</b>      | HG328285         | Y             | 30            | UAG            | CAAUCA         |
| <b>32</b>      | JN107639         | U             | ≥23           | UGA            | CUAUUU         |
| <b>2</b>       | NC_004364        | N             | 23            | UAG            | AGUGAG         |
| <b>22</b>      | ON932436         | N             | 19            | UGA            | CUCUAC         |
| <b>7</b>       | NC_040470        | N             | 9             | UAG            | GUUGAG         |
| <b>28</b>      | KU947035         | N             | 9             | UGA            | GAACCG         |
| <b>6a</b>      | NC_003480        | N             | 3             | UGA            | UGGAGC         |
| <b>9</b>       | NC_022252        | N             | 1             | UAG            | AAGUGA         |
| <b>31</b>      | NC_025481        | N             | 1             | UAG            | GUAUGA         |
| <b>24</b>      | NC_006066        | N             | 1             | UAA            | AUCUAG         |
| <b>19</b>      | NC_003453        | N             | 0             | UAA            | UGAAAA         |

**Supplementary Table B.** Application of HHpred to the putative RT sequence. For each cluster with a putative RT domain (column 1) the amino acid sequence of the reference sequence RT domain (column 2) was submitted to HHpred [1] using the subject databases PDB\_mmCIF70\_18Jun [2] and Pfam-A\_v36 [3]. Many queries returned large numbers of "hits"; the top hit by HHpred "Probability" score is reported in columns 3–5 and the region of the top hit is indicated with blue text and underlining in column 2. HHpred e-values below 1.0 are highlighted in bold red text. Sequences are ordered according to the CP phylogenetic tree (Supplementary Figure B). In the case of NC\_008706 (cluster 11), the RT sequence is shown after insertion of the frame-correcting "A" nucleotide (see Supplementary Dataset C for details). All cysteine and histidine residues are highlighted.

| Cluster | HHpred match on RT sequence                                                                                                                                                                             | PDB/Pfam top hit | HHpred Probability score | HHpred e-value score |
|---------|---------------------------------------------------------------------------------------------------------------------------------------------------------------------------------------------------------|------------------|--------------------------|----------------------|
| 37      | LHSGDYLSELEYDPM <sup>C</sup> SGWFLNRGVRWY <sup>C</sup> PI <sup>C</sup> PACVFTNGYRLGED <sup>H</sup>                                                                                                      | PF17780.5        | 74.41                    | 10                   |
| 6b      | QSGSQISNIVRIFDNLDDL <sup>C</sup> MERFAPYAEGA                                                                                                                                                            | 1GW4_A           | 74.85                    | 5.6                  |
| 5a      | QLGRDISRLRDVSRRAKVPND <sup>C</sup> FIVGCEPAYDIDMCEQA <sup>H</sup> DGYPEVNPVAVLRPR<br>FFSVPRTVRRSRRLNPRLVDEANLPYFTGE <sup>C</sup> VRCGYTPKSLIDQREWE <sup>C</sup> SS <sup>C</sup> Y<br>MLYAA              | 1SPW_A           | 89.33                    | <b>0.25</b>          |
| 5b      | QLGRVNTQFRVLARRVEIPGIDPR <sup>C</sup> EFDAQGLTFRSRVSPRVFNRPRRLNPR<br>LSKEEEEALD <sup>H</sup> FDQVDNSDGADYLD <sup>C</sup> DWRSYVD                                                                        | PF14584.10       | 58.39                    | 13                   |
| 27      | LHSGGVNFD <sup>C</sup> TWNGI <sup>C</sup> SR <sup>C</sup> GF <sup>C</sup> KPKRLVDQYTYT <sup>C</sup> CRECGKIYFA                                                                                          | PF09297.15       | 97.7                     | <b>0.000037</b>      |
| 3       | LYDPSFD <sup>C</sup> CASTMSIPRNI <sup>C</sup> RSWKCC <sup>C</sup> FCNRT <sup>H</sup> HSEFVTE <sup>C</sup>                                                                                               | 2NUT_A           | 91.71                    | <b>0.089</b>         |
| 23      | LYDPFFD <sup>C</sup> SDSANFSFLPPEEMEFKAWRCC <sup>C</sup> YNEI <sup>H</sup> YV                                                                                                                           | PF14803.10       | 87.6                     | <b>0.49</b>          |
| 34      | PHSGRCLV <sup>C</sup> CEVSWGLQTYTRIDDFSLRDE <sup>C</sup> GLYCGADAEIGLL <sup>C</sup> PSFK <sup>C</sup> PQGC<br>TQCL                                                                                      | PF04055.25       | 82.35                    | 1.4                  |
| 35      | PHSGSRCLV <sup>C</sup> CGTWSLQTYTYLEDFSLRDE <sup>C</sup> LLCGADAEI <sup>C</sup> GLI <sup>C</sup> PSFK <sup>C</sup> PLGC<br>TQPCFG                                                                       | 4QIW_W           | 87.27                    | <b>0.67</b>          |
| 33      | PRSGCESCGYV <sup>C</sup> PY <sup>C</sup> CH <sup>C</sup> KCYNDACSVVGC <sup>C</sup> EQNIWFIPDEVFP                                                                                                        | PF14803.10       | 87.5                     | <b>0.48</b>          |
| 18      | PQDC <sup>C</sup> ESCGYIPY <sup>C</sup> CH <sup>C</sup> CECW <sup>C</sup> PYRCY <sup>C</sup> TIGCNANDLWFIDS                                                                                             | PF14803.10       | 84.17                    | <b>0.88</b>          |
| 17a     | LHSGFC <sup>C</sup> PVCGYVPL <sup>C</sup> CH <sup>C</sup> CM <sup>C</sup> NYNSCDVIG <sup>C</sup> CDANDTFCIEDDQV                                                                                         | PF04216.16       | 93.85                    | <b>0.042</b>         |
| 17b     | PRSGLCOSCGFIPY <sup>C</sup> CH <sup>C</sup> YCC <sup>C</sup> DDVCDVIG <sup>C</sup> CLANDTVYDEV                                                                                                          | PF10868.12       | 89.53                    | <b>0.36</b>          |
| 13      | LHSDDCSSRN <sup>C</sup> VIPF <sup>C</sup> CH <sup>C</sup> SC <sup>C</sup> PF <sup>C</sup> HCDVIG <sup>C</sup> CV <sup>C</sup> NDAFFYED                                                                  | PF20365.2        | 91.6                     | <b>0.21</b>          |
| 14      | PRSGECVYL <sup>C</sup> HSNECEKKNV <sup>C</sup> IPF <sup>C</sup> CH <sup>C</sup> CECYDNACNTLWC <sup>C</sup> PANVFC <sup>C</sup> FHEP                                                                     | PF20365.2        | 48.19                    | 15                   |
| 8a      | LHSDDCPSQSVIPF <sup>C</sup> CH <sup>C</sup> CECYDNACGTPW <sup>C</sup> PANANCF <sup>C</sup> HEFHENY                                                                                                      | PF21803.1        | 70.87                    | 3                    |
| 8b      | LHSGDYL <sup>C</sup> H <sup>C</sup> SVECKERK <sup>C</sup> VI <sup>C</sup> PF <sup>C</sup> CH <sup>C</sup> CV <sup>C</sup> YDDACDVLWCSPNDLCY <sup>C</sup> HESNDW                                         | PF20365.2        | 42.99                    | 13                   |
| 25      | RSTSSGSELP <sup>C</sup> IMNNS <sup>C</sup> CARC <sup>C</sup> GFRPPY <sup>C</sup> IDQYI <sup>C</sup> WSCAL <sup>C</sup> CH <sup>C</sup> YKH <sup>C</sup> YHA                                             | 2K4X_A           | 91.63                    | <b>0.024</b>         |
| 36      | KVAASGVVPEMP <sup>C</sup> HVDGNS <sup>C</sup> VRCGYTPKYL <sup>C</sup> IDSYI <sup>C</sup> WTC <sup>C</sup> FMCSYEQYA                                                                                     | PF01907.23       | 80.52                    | <b>0.97</b>          |
| 12      | MVVTDVSGVDANVKSDDSYQDGDY <sup>C</sup> YDTDMFQYDC <sup>C</sup> TDDDGTA <sup>C</sup> YMQDFFSC <sup>C</sup> VAA<br>AMNF                                                                                    | PF15601.10       | 29.07                    | 64                   |
| 20      | RSQSSH <sup>C</sup> DEMPH <sup>C</sup> VKNNS <sup>C</sup> VRCGFRPPQ <sup>C</sup> IDQYV <sup>C</sup> WRRC <sup>C</sup> YLEH <sup>C</sup> AA                                                              | PF18547.5        | 95.09                    | <b>0.0042</b>        |
| 10      | RSQVPSRLELPYFTEK <sup>C</sup> VRCGFAPKY <sup>C</sup> TVDQYI <sup>C</sup> WKCH <sup>C</sup> VCSYEH <sup>C</sup> YHA                                                                                      | 2K4X_A           | 96.19                    | <b>0.0035</b>        |
| 30      | LTADSSSTVVD <sup>C</sup> ELPH <sup>C</sup> MDGNS <sup>C</sup> VRCGF <sup>C</sup> TPKRIVDQYV <sup>C</sup> WR <sup>C</sup> YL <sup>C</sup> CDYPOMA                                                        | PF18547.5        | 94.53                    | <b>0.023</b>         |
| 15      | LSDMPQVNELPYITN <sup>C</sup> CVRCGF <sup>C</sup> KPRRV <sup>C</sup> VDQLVW <sup>C</sup> SCTFLY <sup>C</sup> KQRA                                                                                        | 2CJS_C           | 88.5                     | <b>0.062</b>         |
| 4       | LVNYLEENFEVPH <sup>C</sup> I <sup>C</sup> LPTIV <sup>C</sup> GSCVRC <sup>C</sup> GFRPR <sup>C</sup> VPDARYLW <sup>C</sup> CGMK <sup>C</sup> YLYH <sup>C</sup> YA                                        | PF04216.16       | 86.83                    | <b>0.39</b>          |
| 11      | LSPILEFDLELPH <sup>C</sup> I <sup>C</sup> KNNS <sup>C</sup> VRCGY <sup>C</sup> H <sup>C</sup> PMYV <sup>C</sup> VDQH <sup>C</sup> IWK <sup>C</sup> CDV <sup>C</sup> CH <sup>C</sup> QRH <sup>C</sup> YA | PF09297.15       | 96.26                    | <b>0.0056</b>        |
| 16      | LLSDLNVELPH <sup>C</sup> MRSS <sup>C</sup> CVRCGF <sup>C</sup> CPKYAVDQLI <sup>C</sup> WR <sup>C</sup> HL <sup>C</sup> CGYP <sup>C</sup> HSA                                                            | 3PWF_B           | 93.88                    | <b>0.012</b>         |
| 1       | LDGH <sup>C</sup> LG <sup>C</sup> ETEMPH <sup>C</sup> IDGNS <sup>C</sup> VRCGF <sup>C</sup> TPRRIVDQYI <sup>C</sup> WK <sup>C</sup> CDI <sup>C</sup> CSYEQYA                                            | 2K4X_A           | 95.41                    | <b>0.012</b>         |
| 29      | LDGLVTSGRVSDLP <sup>C</sup> H <sup>C</sup> IDGNS <sup>C</sup> VRCGYAPRYIVDQY <sup>C</sup> WE <sup>C</sup> CTL <sup>C</sup> CSYEQRA                                                                      | PF11781.12       | 91.44                    | <b>0.27</b>          |

**Supplementary Table C.** Host and virus read counts for Ribo-Seq samples.

| virus   | read length | total reads | host rRNA  | host mRNA | vRNA(+) |
|---------|-------------|-------------|------------|-----------|---------|
| AV2     | all         | 48,320,160  | 19,007,036 | 8,818,112 | 177,767 |
|         | 27 nt       | 5,566,016   | 1,264,450  | 2,240,342 | 35,011  |
|         | 28 nt       | 4,654,014   | 1,233,414  | 1,692,623 | 25,832  |
| AV2-2st | all         | 50,912,256  | 22,067,441 | 8,727,297 | 4,598   |
|         | 27 nt       | 6,342,426   | 1,636,497  | 2,480,632 | 1,053   |
|         | 28 nt       | 5,335,007   | 1,544,451  | 1,856,318 | 849     |

**Supplementary Table D.** Raw read counts for the siRNA sequencing experiment.

| Virus | Timepoint | Replicate | Source   | Strand | Read length (nt) | Raw read count |
|-------|-----------|-----------|----------|--------|------------------|----------------|
| mock  | 7 dpi     | 1         | virus    | +      | 21               | 276            |
| mock  | 7 dpi     | 1         | virus    | -      | 21               | 273            |
| mock  | 7 dpi     | 1         | host     | +      | 21               | 1055407        |
| mock  | 7 dpi     | 1         | host     | -      | 21               | 538183         |
| mock  | 7 dpi     | 1         | unmapped | .      | 21               | 115730         |
| mock  | 7 dpi     | 1         | virus    | +      | 22               | 163            |
| mock  | 7 dpi     | 1         | virus    | -      | 22               | 193            |
| mock  | 7 dpi     | 1         | host     | +      | 22               | 1205193        |
| mock  | 7 dpi     | 1         | host     | -      | 22               | 628443         |
| mock  | 7 dpi     | 1         | unmapped | .      | 22               | 139983         |
| mock  | 7 dpi     | 1         | virus    | +      | 24               | 22             |
| mock  | 7 dpi     | 1         | virus    | -      | 24               | 39             |
| mock  | 7 dpi     | 1         | host     | +      | 24               | 5431754        |
| mock  | 7 dpi     | 1         | host     | -      | 24               | 3175028        |
| mock  | 7 dpi     | 1         | unmapped | .      | 24               | 627142         |
| mock  | 7 dpi     | 1         | virus    | +      | all              | 633            |
| mock  | 7 dpi     | 1         | virus    | -      | all              | 683            |
| mock  | 7 dpi     | 1         | host     | +      | all              | 11436024       |
| mock  | 7 dpi     | 1         | host     | -      | all              | 6331472        |
| mock  | 7 dpi     | 1         | unmapped | .      | all              | 1881361        |
| mock  | 7 dpi     | 2         | virus    | +      | 21               | 438            |
| mock  | 7 dpi     | 2         | virus    | -      | 21               | 373            |
| mock  | 7 dpi     | 2         | host     | +      | 21               | 821755         |
| mock  | 7 dpi     | 2         | host     | -      | 21               | 417490         |
| mock  | 7 dpi     | 2         | unmapped | .      | 21               | 111977         |
| mock  | 7 dpi     | 2         | virus    | +      | 22               | 299            |
| mock  | 7 dpi     | 2         | virus    | -      | 22               | 353            |
| mock  | 7 dpi     | 2         | host     | +      | 22               | 915328         |
| mock  | 7 dpi     | 2         | host     | -      | 22               | 465674         |
| mock  | 7 dpi     | 2         | unmapped | .      | 22               | 129937         |
| mock  | 7 dpi     | 2         | virus    | +      | 24               | 128            |
| mock  | 7 dpi     | 2         | virus    | -      | 24               | 114            |
| mock  | 7 dpi     | 2         | host     | +      | 24               | 5213716        |
| mock  | 7 dpi     | 2         | host     | -      | 24               | 3075212        |
| mock  | 7 dpi     | 2         | unmapped | .      | 24               | 669773         |
| mock  | 7 dpi     | 2         | virus    | +      | all              | 1117           |
| mock  | 7 dpi     | 2         | virus    | -      | all              | 1094           |
| mock  | 7 dpi     | 2         | host     | +      | all              | 10359426       |
| mock  | 7 dpi     | 2         | host     | -      | all              | 5788137        |
| mock  | 7 dpi     | 2         | unmapped | .      | all              | 1951177        |
| mock  | 7 dpi     | 3         | virus    | +      | 21               | 334            |

|      |        |   |          |   |     |          |
|------|--------|---|----------|---|-----|----------|
| mock | 7 dpi  | 3 | virus    | - | 21  | 232      |
| mock | 7 dpi  | 3 | host     | + | 21  | 1200057  |
| mock | 7 dpi  | 3 | host     | - | 21  | 610788   |
| mock | 7 dpi  | 3 | unmapped | . | 21  | 179005   |
| mock | 7 dpi  | 3 | virus    | + | 22  | 169      |
| mock | 7 dpi  | 3 | virus    | - | 22  | 204      |
| mock | 7 dpi  | 3 | host     | + | 22  | 1346617  |
| mock | 7 dpi  | 3 | host     | - | 22  | 691810   |
| mock | 7 dpi  | 3 | unmapped | . | 22  | 182305   |
| mock | 7 dpi  | 3 | virus    | + | 24  | 29       |
| mock | 7 dpi  | 3 | virus    | - | 24  | 30       |
| mock | 7 dpi  | 3 | host     | + | 24  | 6397060  |
| mock | 7 dpi  | 3 | host     | - | 24  | 3728144  |
| mock | 7 dpi  | 3 | unmapped | . | 24  | 772605   |
| mock | 7 dpi  | 3 | virus    | + | all | 697      |
| mock | 7 dpi  | 3 | virus    | - | all | 627      |
| mock | 7 dpi  | 3 | host     | + | all | 13367056 |
| mock | 7 dpi  | 3 | host     | - | all | 7385924  |
| mock | 7 dpi  | 3 | unmapped | . | all | 2363181  |
| mock | 14 dpi | 1 | virus    | + | 21  | 789      |
| mock | 14 dpi | 1 | virus    | - | 21  | 693      |
| mock | 14 dpi | 1 | host     | + | 21  | 695413   |
| mock | 14 dpi | 1 | host     | - | 21  | 369866   |
| mock | 14 dpi | 1 | unmapped | . | 21  | 81650    |
| mock | 14 dpi | 1 | virus    | + | 22  | 407      |
| mock | 14 dpi | 1 | virus    | - | 22  | 478      |
| mock | 14 dpi | 1 | host     | + | 22  | 805908   |
| mock | 14 dpi | 1 | host     | - | 22  | 415724   |
| mock | 14 dpi | 1 | unmapped | . | 22  | 96738    |
| mock | 14 dpi | 1 | virus    | + | 24  | 93       |
| mock | 14 dpi | 1 | virus    | - | 24  | 72       |
| mock | 14 dpi | 1 | host     | + | 24  | 4321272  |
| mock | 14 dpi | 1 | host     | - | 24  | 2547719  |
| mock | 14 dpi | 1 | unmapped | . | 24  | 511430   |
| mock | 14 dpi | 1 | virus    | + | all | 1735     |
| mock | 14 dpi | 1 | virus    | - | all | 1656     |
| mock | 14 dpi | 1 | host     | + | all | 8559199  |
| mock | 14 dpi | 1 | host     | - | all | 4817189  |
| mock | 14 dpi | 1 | unmapped | . | all | 1534583  |
| mock | 14 dpi | 2 | virus    | + | 21  | 1563     |
| mock | 14 dpi | 2 | virus    | - | 21  | 1283     |
| mock | 14 dpi | 2 | host     | + | 21  | 635364   |
| mock | 14 dpi | 2 | host     | - | 21  | 333793   |
| mock | 14 dpi | 2 | unmapped | . | 21  | 73459    |

|      |        |   |          |   |     |          |
|------|--------|---|----------|---|-----|----------|
| mock | 14 dpi | 2 | virus    | + | 22  | 784      |
| mock | 14 dpi | 2 | virus    | - | 22  | 874      |
| mock | 14 dpi | 2 | host     | + | 22  | 832277   |
| mock | 14 dpi | 2 | host     | - | 22  | 429652   |
| mock | 14 dpi | 2 | unmapped | . | 22  | 97363    |
| mock | 14 dpi | 2 | virus    | + | 24  | 206      |
| mock | 14 dpi | 2 | virus    | - | 24  | 133      |
| mock | 14 dpi | 2 | host     | + | 24  | 4979894  |
| mock | 14 dpi | 2 | host     | - | 24  | 2993230  |
| mock | 14 dpi | 2 | unmapped | . | 24  | 589592   |
| mock | 14 dpi | 2 | virus    | + | all | 3424     |
| mock | 14 dpi | 2 | virus    | - | all | 3078     |
| mock | 14 dpi | 2 | host     | + | all | 9175618  |
| mock | 14 dpi | 2 | host     | - | all | 5300838  |
| mock | 14 dpi | 2 | unmapped | . | all | 1574112  |
| mock | 14 dpi | 3 | virus    | + | 21  | 1465     |
| mock | 14 dpi | 3 | virus    | - | 21  | 1220     |
| mock | 14 dpi | 3 | host     | + | 21  | 888192   |
| mock | 14 dpi | 3 | host     | - | 21  | 471621   |
| mock | 14 dpi | 3 | unmapped | . | 21  | 106845   |
| mock | 14 dpi | 3 | virus    | + | 22  | 788      |
| mock | 14 dpi | 3 | virus    | - | 22  | 848      |
| mock | 14 dpi | 3 | host     | + | 22  | 1093864  |
| mock | 14 dpi | 3 | host     | - | 22  | 562598   |
| mock | 14 dpi | 3 | unmapped | . | 22  | 129804   |
| mock | 14 dpi | 3 | virus    | + | 24  | 161      |
| mock | 14 dpi | 3 | virus    | - | 24  | 138      |
| mock | 14 dpi | 3 | host     | + | 24  | 6419086  |
| mock | 14 dpi | 3 | host     | - | 24  | 3845886  |
| mock | 14 dpi | 3 | unmapped | . | 24  | 764725   |
| mock | 14 dpi | 3 | virus    | + | all | 3185     |
| mock | 14 dpi | 3 | virus    | - | all | 2893     |
| mock | 14 dpi | 3 | host     | + | all | 11938439 |
| mock | 14 dpi | 3 | host     | - | all | 6865971  |
| mock | 14 dpi | 3 | unmapped | . | all | 2077932  |
| AV2  | 7 dpi  | 1 | virus    | + | 21  | 81896    |
| AV2  | 7 dpi  | 1 | virus    | - | 21  | 69623    |
| AV2  | 7 dpi  | 1 | host     | + | 21  | 999049   |
| AV2  | 7 dpi  | 1 | host     | - | 21  | 546714   |
| AV2  | 7 dpi  | 1 | unmapped | . | 21  | 163759   |
| AV2  | 7 dpi  | 1 | virus    | + | 22  | 45422    |
| AV2  | 7 dpi  | 1 | virus    | - | 22  | 45133    |
| AV2  | 7 dpi  | 1 | host     | + | 22  | 1029517  |
| AV2  | 7 dpi  | 1 | host     | - | 22  | 525103   |

|     |       |   |          |   |     |          |
|-----|-------|---|----------|---|-----|----------|
| AV2 | 7 dpi | 1 | unmapped | . | 22  | 159358   |
| AV2 | 7 dpi | 1 | virus    | + | 24  | 5391     |
| AV2 | 7 dpi | 1 | virus    | - | 24  | 4531     |
| AV2 | 7 dpi | 1 | host     | + | 24  | 5624994  |
| AV2 | 7 dpi | 1 | host     | - | 24  | 3287128  |
| AV2 | 7 dpi | 1 | unmapped | . | 24  | 779313   |
| AV2 | 7 dpi | 1 | virus    | + | all | 187386   |
| AV2 | 7 dpi | 1 | virus    | - | all | 166376   |
| AV2 | 7 dpi | 1 | host     | + | all | 11413369 |
| AV2 | 7 dpi | 1 | host     | - | all | 6338447  |
| AV2 | 7 dpi | 1 | unmapped | . | all | 2198590  |
| AV2 | 7 dpi | 2 | virus    | + | 21  | 43781    |
| AV2 | 7 dpi | 2 | virus    | - | 21  | 34181    |
| AV2 | 7 dpi | 2 | host     | + | 21  | 916479   |
| AV2 | 7 dpi | 2 | host     | - | 21  | 457744   |
| AV2 | 7 dpi | 2 | unmapped | . | 21  | 172149   |
| AV2 | 7 dpi | 2 | virus    | + | 22  | 28955    |
| AV2 | 7 dpi | 2 | virus    | - | 22  | 25748    |
| AV2 | 7 dpi | 2 | host     | + | 22  | 1012069  |
| AV2 | 7 dpi | 2 | host     | - | 22  | 507742   |
| AV2 | 7 dpi | 2 | unmapped | . | 22  | 187860   |
| AV2 | 7 dpi | 2 | virus    | + | 24  | 4930     |
| AV2 | 7 dpi | 2 | virus    | - | 24  | 2982     |
| AV2 | 7 dpi | 2 | host     | + | 24  | 5401836  |
| AV2 | 7 dpi | 2 | host     | - | 24  | 3206735  |
| AV2 | 7 dpi | 2 | unmapped | . | 24  | 724886   |
| AV2 | 7 dpi | 2 | virus    | + | all | 116297   |
| AV2 | 7 dpi | 2 | virus    | - | all | 88050    |
| AV2 | 7 dpi | 2 | host     | + | all | 10938522 |
| AV2 | 7 dpi | 2 | host     | - | all | 6052006  |
| AV2 | 7 dpi | 2 | unmapped | . | all | 2432103  |
| AV2 | 7 dpi | 3 | virus    | + | 21  | 62424    |
| AV2 | 7 dpi | 3 | virus    | - | 21  | 54734    |
| AV2 | 7 dpi | 3 | host     | + | 21  | 1266850  |
| AV2 | 7 dpi | 3 | host     | - | 21  | 656481   |
| AV2 | 7 dpi | 3 | unmapped | . | 21  | 154681   |
| AV2 | 7 dpi | 3 | virus    | + | 22  | 40174    |
| AV2 | 7 dpi | 3 | virus    | - | 22  | 40071    |
| AV2 | 7 dpi | 3 | host     | + | 22  | 1453283  |
| AV2 | 7 dpi | 3 | host     | - | 22  | 754158   |
| AV2 | 7 dpi | 3 | unmapped | . | 22  | 178617   |
| AV2 | 7 dpi | 3 | virus    | + | 24  | 5291     |
| AV2 | 7 dpi | 3 | virus    | - | 24  | 4802     |
| AV2 | 7 dpi | 3 | host     | + | 24  | 6973629  |



|     |        |   |          |   |     |          |
|-----|--------|---|----------|---|-----|----------|
| AV2 | 7 dpi  | 3 | host     | - | 24  | 4134853  |
| AV2 | 7 dpi  | 3 | unmapped | . | 24  | 874838   |
| AV2 | 7 dpi  | 3 | virus    | + | all | 154063   |
| AV2 | 7 dpi  | 3 | virus    | - | all | 136658   |
| AV2 | 7 dpi  | 3 | host     | + | all | 14275505 |
| AV2 | 7 dpi  | 3 | host     | - | all | 8009527  |
| AV2 | 7 dpi  | 3 | unmapped | . | all | 2553106  |
| AV2 | 14 dpi | 1 | virus    | + | 21  | 150890   |
| AV2 | 14 dpi | 1 | virus    | - | 21  | 131937   |
| AV2 | 14 dpi | 1 | host     | + | 21  | 772030   |
| AV2 | 14 dpi | 1 | host     | - | 21  | 403352   |
| AV2 | 14 dpi | 1 | unmapped | . | 21  | 109222   |
| AV2 | 14 dpi | 1 | virus    | + | 22  | 91813    |
| AV2 | 14 dpi | 1 | virus    | - | 22  | 94685    |
| AV2 | 14 dpi | 1 | host     | + | 22  | 856996   |
| AV2 | 14 dpi | 1 | host     | - | 22  | 437223   |
| AV2 | 14 dpi | 1 | unmapped | . | 22  | 116884   |
| AV2 | 14 dpi | 1 | virus    | + | 24  | 12121    |
| AV2 | 14 dpi | 1 | virus    | - | 24  | 12334    |
| AV2 | 14 dpi | 1 | host     | + | 24  | 5139755  |
| AV2 | 14 dpi | 1 | host     | - | 24  | 3032017  |
| AV2 | 14 dpi | 1 | unmapped | . | 24  | 590159   |
| AV2 | 14 dpi | 1 | virus    | + | all | 333981   |
| AV2 | 14 dpi | 1 | virus    | - | all | 310585   |
| AV2 | 14 dpi | 1 | host     | + | all | 9581894  |
| AV2 | 14 dpi | 1 | host     | - | all | 5406854  |
| AV2 | 14 dpi | 1 | unmapped | . | all | 1698819  |
| AV2 | 14 dpi | 2 | virus    | + | 21  | 131349   |
| AV2 | 14 dpi | 2 | virus    | - | 21  | 112081   |
| AV2 | 14 dpi | 2 | host     | + | 21  | 673390   |
| AV2 | 14 dpi | 2 | host     | - | 21  | 358323   |
| AV2 | 14 dpi | 2 | unmapped | . | 21  | 94780    |
| AV2 | 14 dpi | 2 | virus    | + | 22  | 79447    |
| AV2 | 14 dpi | 2 | virus    | - | 22  | 80229    |
| AV2 | 14 dpi | 2 | host     | + | 22  | 814725   |
| AV2 | 14 dpi | 2 | host     | - | 22  | 419359   |
| AV2 | 14 dpi | 2 | unmapped | . | 22  | 106645   |
| AV2 | 14 dpi | 2 | virus    | + | 24  | 10259    |
| AV2 | 14 dpi | 2 | virus    | - | 24  | 10080    |
| AV2 | 14 dpi | 2 | host     | + | 24  | 5130658  |
| AV2 | 14 dpi | 2 | host     | - | 24  | 3048568  |
| AV2 | 14 dpi | 2 | unmapped | . | 24  | 601212   |
| AV2 | 14 dpi | 2 | virus    | + | all | 287925   |
| AV2 | 14 dpi | 2 | virus    | - | all | 259739   |

|         |        |   |          |   |     |          |
|---------|--------|---|----------|---|-----|----------|
| AV2     | 14 dpi | 2 | host     | + | all | 9311113  |
| AV2     | 14 dpi | 2 | host     | - | all | 5316208  |
| AV2     | 14 dpi | 2 | unmapped | . | all | 1622039  |
| AV2     | 14 dpi | 3 | virus    | + | 21  | 116259   |
| AV2     | 14 dpi | 3 | virus    | - | 21  | 101956   |
| AV2     | 14 dpi | 3 | host     | + | 21  | 756952   |
| AV2     | 14 dpi | 3 | host     | - | 21  | 405676   |
| AV2     | 14 dpi | 3 | unmapped | . | 21  | 94740    |
| AV2     | 14 dpi | 3 | virus    | + | 22  | 77014    |
| AV2     | 14 dpi | 3 | virus    | - | 22  | 80673    |
| AV2     | 14 dpi | 3 | host     | + | 22  | 965815   |
| AV2     | 14 dpi | 3 | host     | - | 22  | 498493   |
| AV2     | 14 dpi | 3 | unmapped | . | 22  | 113323   |
| AV2     | 14 dpi | 3 | virus    | + | 24  | 10574    |
| AV2     | 14 dpi | 3 | virus    | - | 24  | 10150    |
| AV2     | 14 dpi | 3 | host     | + | 24  | 5724424  |
| AV2     | 14 dpi | 3 | host     | - | 24  | 3397048  |
| AV2     | 14 dpi | 3 | unmapped | . | 24  | 649078   |
| AV2     | 14 dpi | 3 | virus    | + | all | 265636   |
| AV2     | 14 dpi | 3 | virus    | - | all | 244574   |
| AV2     | 14 dpi | 3 | host     | + | all | 10447761 |
| AV2     | 14 dpi | 3 | host     | - | all | 5976742  |
| AV2     | 14 dpi | 3 | unmapped | . | all | 1800072  |
| AV2-2st | 7 dpi  | 1 | virus    | + | 21  | 786803   |
| AV2-2st | 7 dpi  | 1 | virus    | - | 21  | 630903   |
| AV2-2st | 7 dpi  | 1 | host     | + | 21  | 862000   |
| AV2-2st | 7 dpi  | 1 | host     | - | 21  | 440807   |
| AV2-2st | 7 dpi  | 1 | unmapped | . | 21  | 226766   |
| AV2-2st | 7 dpi  | 1 | virus    | + | 22  | 401503   |
| AV2-2st | 7 dpi  | 1 | virus    | - | 22  | 427125   |
| AV2-2st | 7 dpi  | 1 | host     | + | 22  | 818031   |
| AV2-2st | 7 dpi  | 1 | host     | - | 22  | 410786   |
| AV2-2st | 7 dpi  | 1 | unmapped | . | 22  | 191654   |
| AV2-2st | 7 dpi  | 1 | virus    | + | 24  | 88321    |
| AV2-2st | 7 dpi  | 1 | virus    | - | 24  | 63639    |
| AV2-2st | 7 dpi  | 1 | host     | + | 24  | 4216389  |
| AV2-2st | 7 dpi  | 1 | host     | - | 24  | 2533803  |
| AV2-2st | 7 dpi  | 1 | unmapped | . | 24  | 567599   |
| AV2-2st | 7 dpi  | 1 | virus    | + | all | 1612218  |
| AV2-2st | 7 dpi  | 1 | virus    | - | all | 1434578  |
| AV2-2st | 7 dpi  | 1 | host     | + | all | 8679920  |
| AV2-2st | 7 dpi  | 1 | host     | - | all | 4857658  |
| AV2-2st | 7 dpi  | 1 | unmapped | . | all | 2009068  |
| AV2-2st | 7 dpi  | 2 | virus    | + | 21  | 586591   |

|         |        |   |          |   |     |         |
|---------|--------|---|----------|---|-----|---------|
| AV2-2st | 7 dpi  | 2 | virus    | - | 21  | 508997  |
| AV2-2st | 7 dpi  | 2 | host     | + | 21  | 857503  |
| AV2-2st | 7 dpi  | 2 | host     | - | 21  | 443205  |
| AV2-2st | 7 dpi  | 2 | unmapped | . | 21  | 167184  |
| AV2-2st | 7 dpi  | 2 | virus    | + | 22  | 345691  |
| AV2-2st | 7 dpi  | 2 | virus    | - | 22  | 384369  |
| AV2-2st | 7 dpi  | 2 | host     | + | 22  | 1012463 |
| AV2-2st | 7 dpi  | 2 | host     | - | 22  | 517723  |
| AV2-2st | 7 dpi  | 2 | unmapped | . | 22  | 165559  |
| AV2-2st | 7 dpi  | 2 | virus    | + | 24  | 73430   |
| AV2-2st | 7 dpi  | 2 | virus    | - | 24  | 54284   |
| AV2-2st | 7 dpi  | 2 | host     | + | 24  | 5230251 |
| AV2-2st | 7 dpi  | 2 | host     | - | 24  | 3084689 |
| AV2-2st | 7 dpi  | 2 | unmapped | . | 24  | 649565  |
| AV2-2st | 7 dpi  | 2 | virus    | + | all | 1230117 |
| AV2-2st | 7 dpi  | 2 | virus    | - | all | 1167815 |
| AV2-2st | 7 dpi  | 2 | host     | + | all | 9964675 |
| AV2-2st | 7 dpi  | 2 | host     | - | all | 5613881 |
| AV2-2st | 7 dpi  | 2 | unmapped | . | all | 1942258 |
| AV2-2st | 7 dpi  | 3 | virus    | + | 21  | 552816  |
| AV2-2st | 7 dpi  | 3 | virus    | - | 21  | 439666  |
| AV2-2st | 7 dpi  | 3 | host     | + | 21  | 785651  |
| AV2-2st | 7 dpi  | 3 | host     | - | 21  | 404422  |
| AV2-2st | 7 dpi  | 3 | unmapped | . | 21  | 155251  |
| AV2-2st | 7 dpi  | 3 | virus    | + | 22  | 301820  |
| AV2-2st | 7 dpi  | 3 | virus    | - | 22  | 320952  |
| AV2-2st | 7 dpi  | 3 | host     | + | 22  | 898216  |
| AV2-2st | 7 dpi  | 3 | host     | - | 22  | 459754  |
| AV2-2st | 7 dpi  | 3 | unmapped | . | 22  | 151440  |
| AV2-2st | 7 dpi  | 3 | virus    | + | 24  | 71443   |
| AV2-2st | 7 dpi  | 3 | virus    | - | 24  | 51663   |
| AV2-2st | 7 dpi  | 3 | host     | + | 24  | 4747985 |
| AV2-2st | 7 dpi  | 3 | host     | - | 24  | 2839289 |
| AV2-2st | 7 dpi  | 3 | unmapped | . | 24  | 611546  |
| AV2-2st | 7 dpi  | 3 | virus    | + | all | 1140637 |
| AV2-2st | 7 dpi  | 3 | virus    | - | all | 1010579 |
| AV2-2st | 7 dpi  | 3 | host     | + | all | 8882301 |
| AV2-2st | 7 dpi  | 3 | host     | - | all | 5037836 |
| AV2-2st | 7 dpi  | 3 | unmapped | . | all | 1773338 |
| AV2-2st | 14 dpi | 1 | virus    | + | 21  | 500457  |
| AV2-2st | 14 dpi | 1 | virus    | - | 21  | 434532  |
| AV2-2st | 14 dpi | 1 | host     | + | 21  | 737781  |
| AV2-2st | 14 dpi | 1 | host     | - | 21  | 379320  |
| AV2-2st | 14 dpi | 1 | unmapped | . | 21  | 158246  |

|         |        |   |          |   |     |          |
|---------|--------|---|----------|---|-----|----------|
| AV2-2st | 14 dpi | 1 | virus    | + | 22  | 226080   |
| AV2-2st | 14 dpi | 1 | virus    | - | 22  | 262190   |
| AV2-2st | 14 dpi | 1 | host     | + | 22  | 855869   |
| AV2-2st | 14 dpi | 1 | host     | - | 22  | 438130   |
| AV2-2st | 14 dpi | 1 | unmapped | . | 22  | 142326   |
| AV2-2st | 14 dpi | 1 | virus    | + | 24  | 63261    |
| AV2-2st | 14 dpi | 1 | virus    | - | 24  | 52838    |
| AV2-2st | 14 dpi | 1 | host     | + | 24  | 4399578  |
| AV2-2st | 14 dpi | 1 | host     | - | 24  | 2578037  |
| AV2-2st | 14 dpi | 1 | unmapped | . | 24  | 583481   |
| AV2-2st | 14 dpi | 1 | virus    | + | all | 1091744  |
| AV2-2st | 14 dpi | 1 | virus    | - | all | 1077262  |
| AV2-2st | 14 dpi | 1 | host     | + | all | 8877328  |
| AV2-2st | 14 dpi | 1 | host     | - | all | 4940102  |
| AV2-2st | 14 dpi | 1 | unmapped | . | all | 1777157  |
| AV2-2st | 14 dpi | 2 | virus    | + | 21  | 611986   |
| AV2-2st | 14 dpi | 2 | virus    | - | 21  | 510763   |
| AV2-2st | 14 dpi | 2 | host     | + | 21  | 862146   |
| AV2-2st | 14 dpi | 2 | host     | - | 21  | 446526   |
| AV2-2st | 14 dpi | 2 | unmapped | . | 21  | 170055   |
| AV2-2st | 14 dpi | 2 | virus    | + | 22  | 272373   |
| AV2-2st | 14 dpi | 2 | virus    | - | 22  | 305109   |
| AV2-2st | 14 dpi | 2 | host     | + | 22  | 983602   |
| AV2-2st | 14 dpi | 2 | host     | - | 22  | 504189   |
| AV2-2st | 14 dpi | 2 | unmapped | . | 22  | 148657   |
| AV2-2st | 14 dpi | 2 | virus    | + | 24  | 71808    |
| AV2-2st | 14 dpi | 2 | virus    | - | 24  | 60454    |
| AV2-2st | 14 dpi | 2 | host     | + | 24  | 5204807  |
| AV2-2st | 14 dpi | 2 | host     | - | 24  | 3094605  |
| AV2-2st | 14 dpi | 2 | unmapped | . | 24  | 649306   |
| AV2-2st | 14 dpi | 2 | virus    | + | all | 1318672  |
| AV2-2st | 14 dpi | 2 | virus    | - | all | 1249833  |
| AV2-2st | 14 dpi | 2 | host     | + | all | 10312606 |
| AV2-2st | 14 dpi | 2 | host     | - | all | 5810738  |
| AV2-2st | 14 dpi | 2 | unmapped | . | all | 1947214  |
| AV2-2st | 14 dpi | 3 | virus    | + | 21  | 753070   |
| AV2-2st | 14 dpi | 3 | virus    | - | 21  | 640413   |
| AV2-2st | 14 dpi | 3 | host     | + | 21  | 956017   |
| AV2-2st | 14 dpi | 3 | host     | - | 21  | 491360   |
| AV2-2st | 14 dpi | 3 | unmapped | . | 21  | 215224   |
| AV2-2st | 14 dpi | 3 | virus    | + | 22  | 340707   |
| AV2-2st | 14 dpi | 3 | virus    | - | 22  | 388792   |
| AV2-2st | 14 dpi | 3 | host     | + | 22  | 1086332  |
| AV2-2st | 14 dpi | 3 | host     | - | 22  | 556084   |

|         |        |   |          |   |     |          |
|---------|--------|---|----------|---|-----|----------|
| AV2-2st | 14 dpi | 3 | unmapped | . | 22  | 181428   |
| AV2-2st | 14 dpi | 3 | virus    | + | 24  | 87592    |
| AV2-2st | 14 dpi | 3 | virus    | - | 24  | 69277    |
| AV2-2st | 14 dpi | 3 | host     | + | 24  | 5542900  |
| AV2-2st | 14 dpi | 3 | host     | - | 24  | 3276754  |
| AV2-2st | 14 dpi | 3 | unmapped | . | 24  | 766900   |
| AV2-2st | 14 dpi | 3 | virus    | + | all | 1625210  |
| AV2-2st | 14 dpi | 3 | virus    | - | all | 1569510  |
| AV2-2st | 14 dpi | 3 | host     | + | all | 11200593 |
| AV2-2st | 14 dpi | 3 | host     | - | all | 6274925  |
| AV2-2st | 14 dpi | 3 | unmapped | . | all | 2240760  |

**Supplementary Table E.** Comparisons of vsRNA read counts across different samples and timepoints. Each count (columns 4 and 5) is based on the average of three replicates where, for each replicate, the sum of positive-sense and negative-sense virus-mapping read counts from Supplementary Table D is multiplied by the corresponding normalisation factor from Supplementary Table F.

| Comparison (group1 – group 2) | Read length (nt) | Time point | Mean read count – group 1 (normalised) | Mean read count – group 2 (normalised) | Mean difference | <i>t</i> | df | <i>p</i> -value | Fold change |
|-------------------------------|------------------|------------|----------------------------------------|----------------------------------------|-----------------|----------|----|-----------------|-------------|
| AV2 – AV2-2st                 | 21               | 7 dpi      | 28464                                  | 301891                                 | 273427          | -18.4    | 2  | 0.0000          | 10.6        |
| AV2 – AV2-2st                 | 21               | 14 dpi     | 104040                                 | 420645                                 | 316605          | -18.7    | 2  | 0.0000          | 4.0         |
| AV2 – AV2-2st                 | 22               | 7 dpi      | 18380                                  | 188607                                 | 170226          | -23.7    | 2  | 0.0000          | 10.3        |
| AV2 – AV2-2st                 | 22               | 14 dpi     | 70457                                  | 218828                                 | 148370          | -15.3    | 2  | 0.0001          | 3.1         |
| AV2 – AV2-2st                 | 24               | 7 dpi      | 2260                                   | 34871                                  | 32610           | -121.3   | 2  | 0.0000          | 15.4        |
| AV2 – AV2-2st                 | 24               | 14 dpi     | 9150                                   | 49663                                  | 40512           | -23.5    | 2  | 0.0000          | 5.4         |
| AV2 – AV2-2st                 | all              | 7 dpi      | 69471                                  | 654452                                 | 584981          | -19.4    | 2  | 0.0000          | 9.4         |
| AV2 – AV2-2st                 | all              | 14 dpi     | 237837                                 | 967540                                 | 729702          | -18.9    | 2  | 0.0000          | 4.1         |
| 7 dpi – 14 dpi AV2            | 21               | –          | 28464                                  | 104040                                 | 75576           | -8.0     | 2  | 0.0006          | 3.7         |
| 7 dpi – 14 dpi AV2            | 22               | –          | 18380                                  | 70457                                  | 52077           | -11.7    | 2  | 0.0002          | 3.8         |
| 7 dpi – 14 dpi AV2            | 24               | –          | 2260                                   | 9150                                   | 6889            | -18.8    | 2  | 0.0000          | 4.0         |
| 7 dpi – 14 dpi AV2            | all              | –          | 69471                                  | 237837                                 | 168366          | -8.9     | 2  | 0.0004          | 3.4         |
| 7 dpi – 14 dpi AV2-2st        | 21               | –          | 301891                                 | 420645                                 | 118754          | -5.8     | 2  | 0.0022          | 1.4         |
| 7 dpi – 14 dpi AV2-2st        | 22               | –          | 188607                                 | 218828                                 | 30221           | -2.7     | 2  | 0.0271          | 1.2         |
| 7 dpi – 14 dpi AV2-2st        | 24               | –          | 34871                                  | 49663                                  | 14791           | -8.7     | 2  | 0.0005          | 1.4         |
| 7 dpi – 14 dpi AV2-2st        | all              | –          | 654452                                 | 967540                                 | 313087          | -6.9     | 2  | 0.0011          | 1.5         |

**Supplementary Table F.** Normalisation factors for each library. These were calculated based on the total number of 21 nt reads mapped in positive sense to the curated set of 128 miRNAs (see main text). (Note, the products of the values in columns 4 and 5 equates to 34477, the size of the smallest library i.e. mock 14 dpi replicate 2.)

| Virus   | Timepoint | Replicate | Number of reads | Normalisation factor |
|---------|-----------|-----------|-----------------|----------------------|
| AV2-2st | 14 dpi    | 1         | 76778           | 0.4490               |
| AV2-2st | 7 dpi     | 1         | 149678          | 0.2303               |
| AV2-2st | 14 dpi    | 2         | 98284           | 0.3508               |
| AV2-2st | 7 dpi     | 2         | 126994          | 0.2715               |
| AV2-2st | 14 dpi    | 3         | 107183          | 0.3217               |
| AV2-2st | 7 dpi     | 3         | 121476          | 0.2838               |
| mock    | 14 dpi    | 1         | 75187           | 0.4586               |
| mock    | 7 dpi     | 1         | 144431          | 0.2387               |
| mock    | 14 dpi    | 2         | 34477           | 1.0000               |
| mock    | 7 dpi     | 2         | 95164           | 0.3623               |
| mock    | 14 dpi    | 3         | 62630           | 0.5505               |
| mock    | 7 dpi     | 3         | 109721          | 0.3142               |
| AV2     | 14 dpi    | 1         | 95636           | 0.3605               |
| AV2     | 7 dpi     | 1         | 124258          | 0.2775               |
| AV2     | 14 dpi    | 2         | 72417           | 0.4761               |
| AV2     | 7 dpi     | 2         | 140068          | 0.2461               |
| AV2     | 14 dpi    | 3         | 79809           | 0.4320               |
| AV2     | 7 dpi     | 3         | 167169          | 0.2062               |

**Supplementary Figure A.** Histograms of median length across a cluster of the ORF in-frame with and immediately 3'-adjacent to the CP stop codon, for sequences with (pink) and sequences without (black) a putative RT domain. Data from columns 3 and 4 of Supplementary Table A.

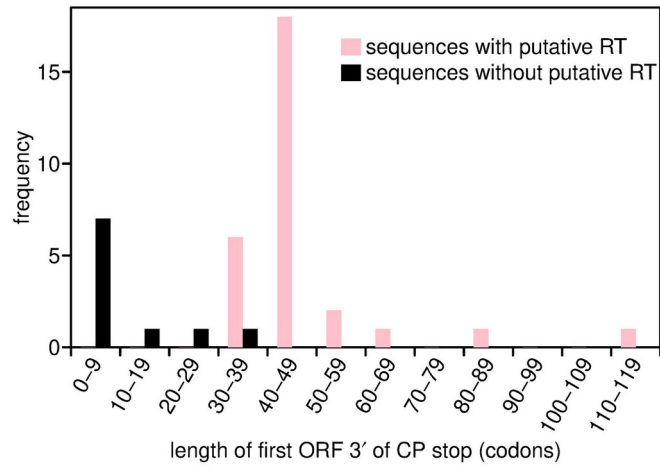



**Supplementary Figure B.** Phylogenetic tree of the *Iilarvirus* CP protein. CP amino acid sequences translated from reference sequences (one for each cluster) were aligned with MUSCLE [7] and a phylogenetic tree was estimated using the Bayesian Markov chain Monte Carlo method implemented in MrBayes version 3.2.3 [4], sampling across the default set of fixed amino acid rate matrices, with one million generations, discarding the first 25% as burn-in. The tree was visualized with FigTree (<http://tree.bio.ed.ac.uk/software/figtree/>). Reference sequences that have a putative readthrough domain (as defined by the apparent presence of a lengthy insert in RNA3 when the 3'-of-CP region was compared with the 3'UTRs of RNAs 2 and 3) are in red. Sequences for which this is unknown due to the absence of appropriate RNA1/RNA2 sequence data are in purple. Sequences that are proposed not to have a readthrough domain are in black. The tree is midpoint rooted and nodes are labelled with posterior probability values. Note that apple mosaic virus and lilac leaf chlorosis virus each occur twice on the tree since each species has representatives in >1 clusters (indicated by the cluster suffixes 6a/6b and 28/31, respectively) – see Supplementary Data C for details.

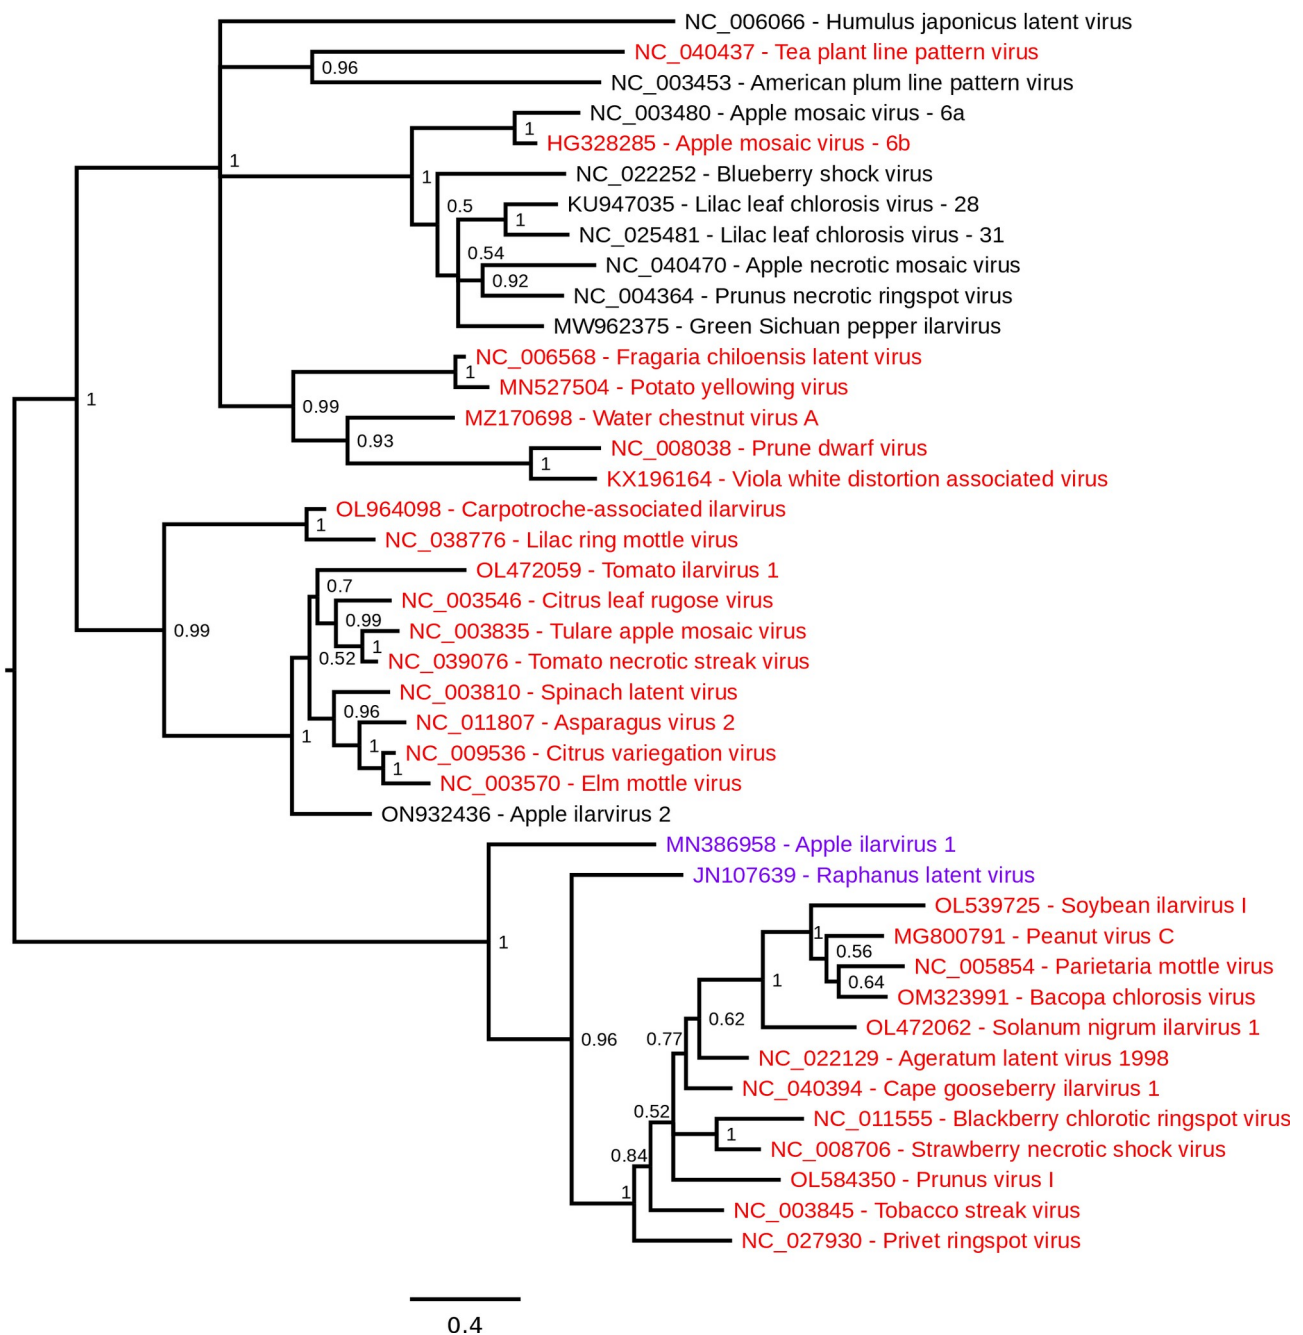

**Supplementary Figure C.** Phylogenetic tree of the *Iilarvirus* MP protein. MP amino acid sequences were translated from the same set of reference sequences used in Supplementary Figure B. Other details are as described in the Supplementary Figure B caption.

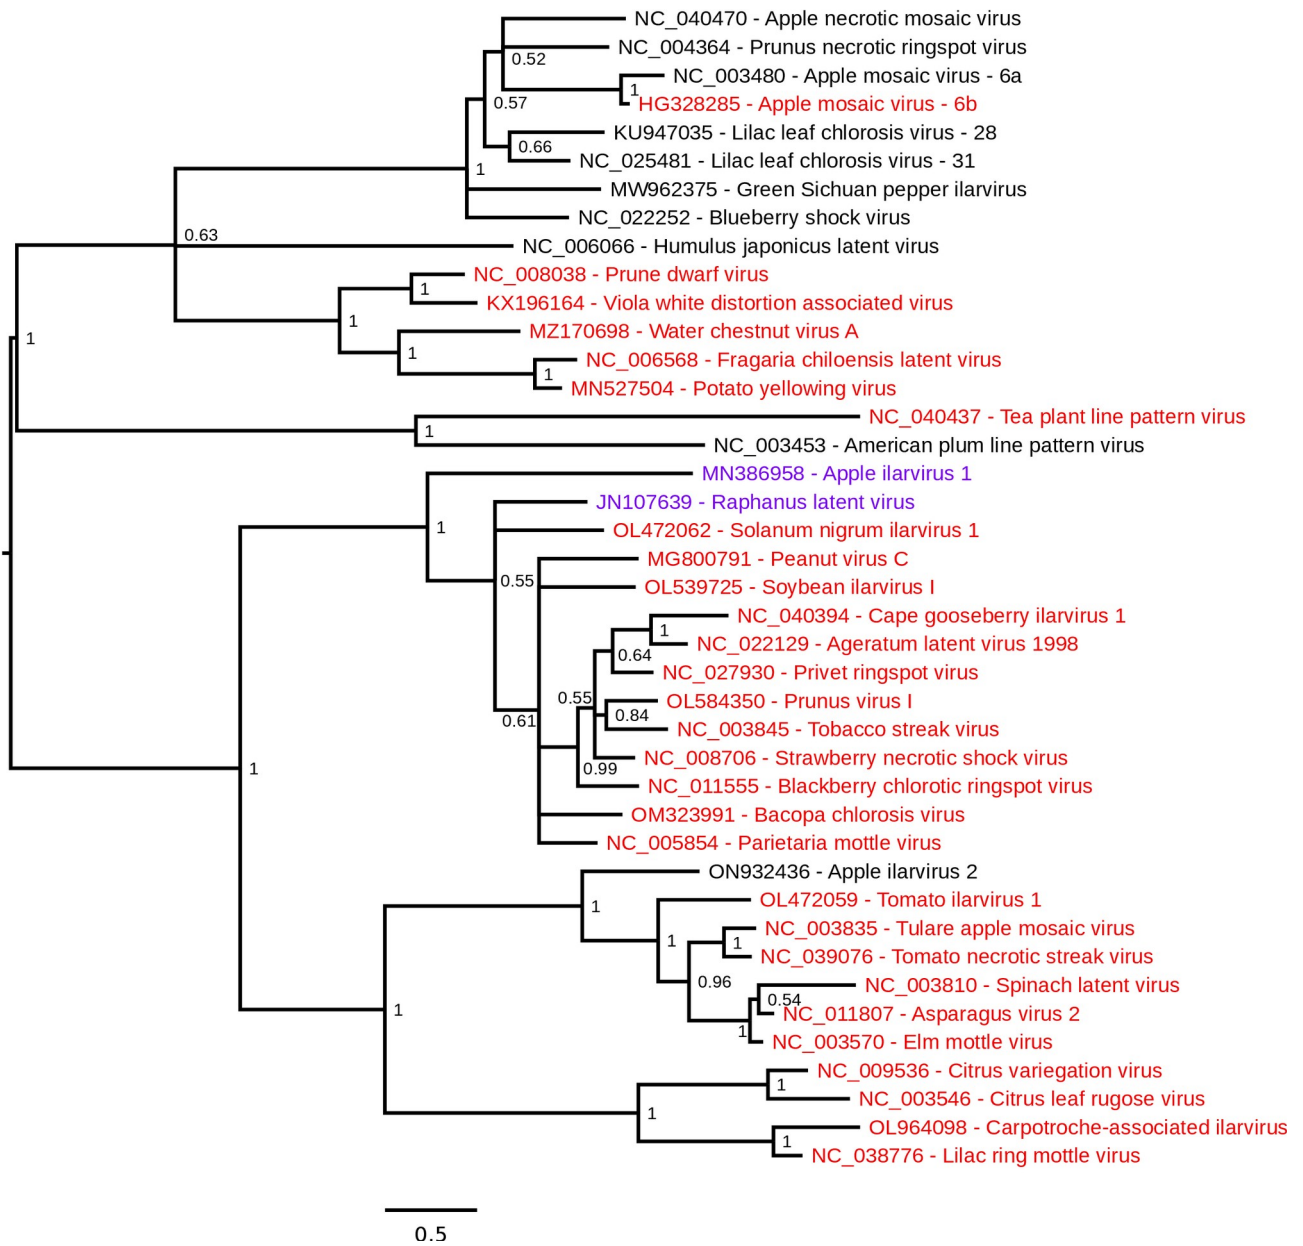

**Supplementary Figure D.** Phylogenetic tree of the *Iilarvirus* ORF1 protein. ORF1 amino acid sequences were translated from a set of RNA1 reference sequences matched to the RNA3 reference sequences used in Supplementary Figure B and elsewhere in this study. Other details are as described in the Supplementary Figure B caption. Note that, due to the absence of matched RNA1 sequences for the RNA3 sequences HG328285, MN386958 and JN107639, these species are excluded from the ORF1 tree.

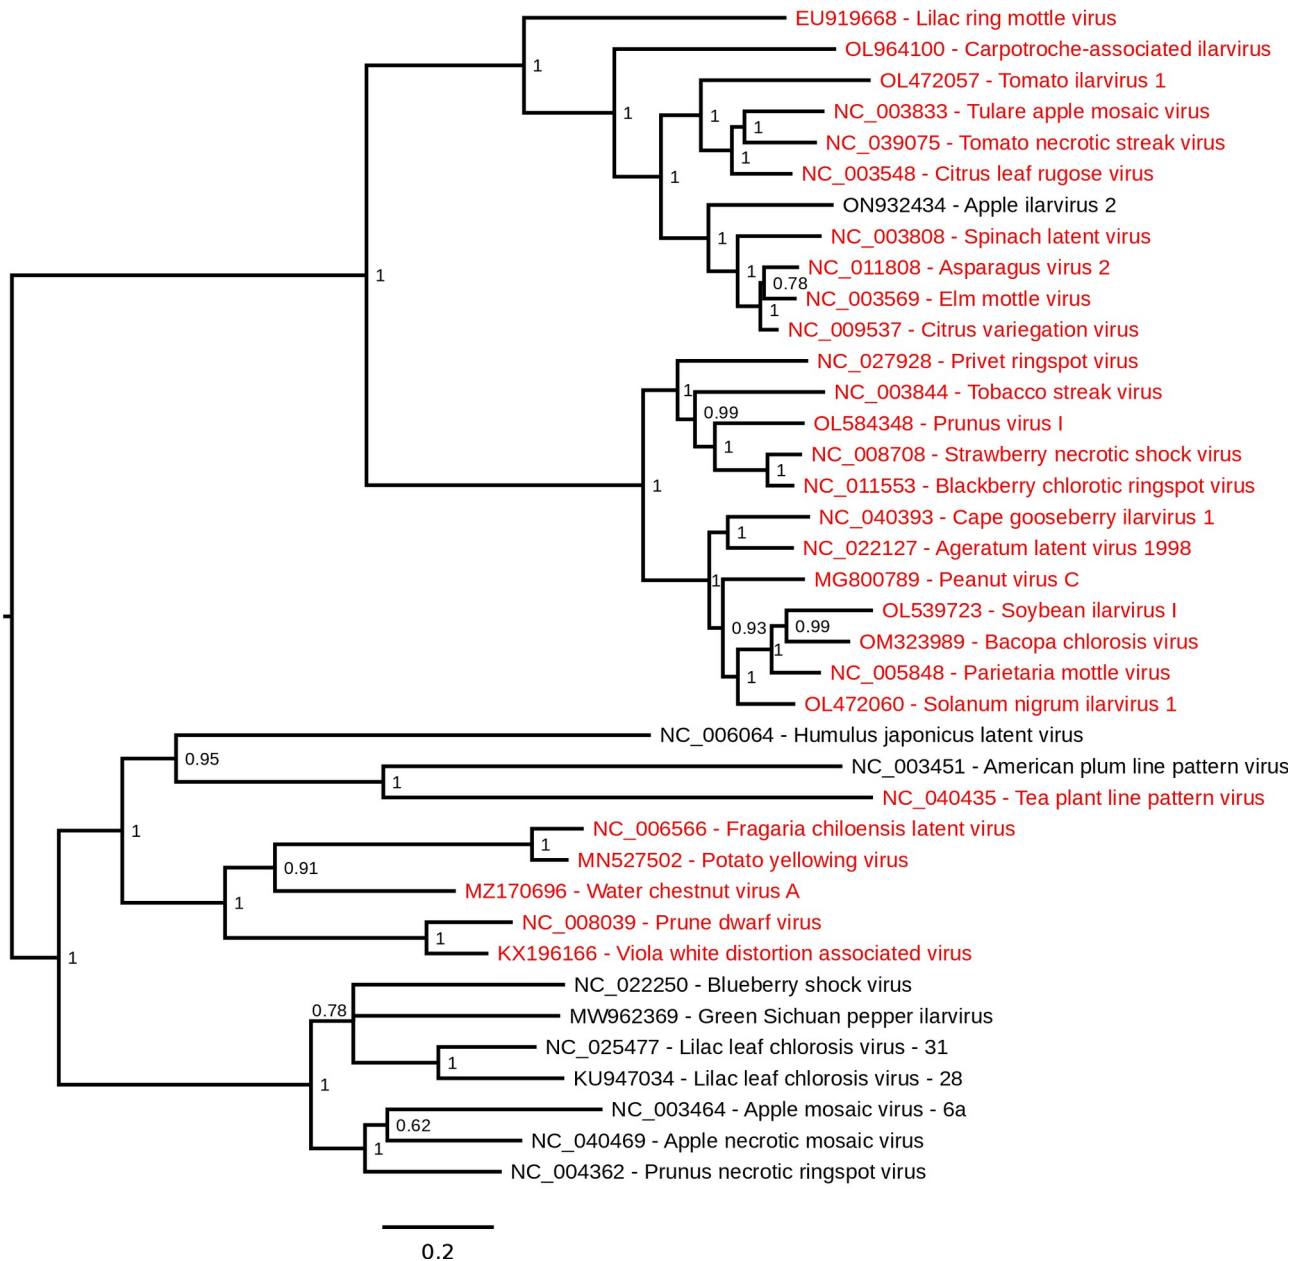

**Supplementary Figure E.** Phylogenetic tree of the *Iilarvirus* ORF2a protein. ORF2a amino acid sequences were translated from a set of RNA2 reference sequences matched to the RNA3 reference sequences used in Supplementary Figure B and elsewhere in this study. Other details are as described in the Supplementary Figure B caption. Note that, due to the absence of matched RNA2 sequences for the RNA3 sequences HG328285, MN386958 and JN107639, these species are excluded from the ORF2a tree.

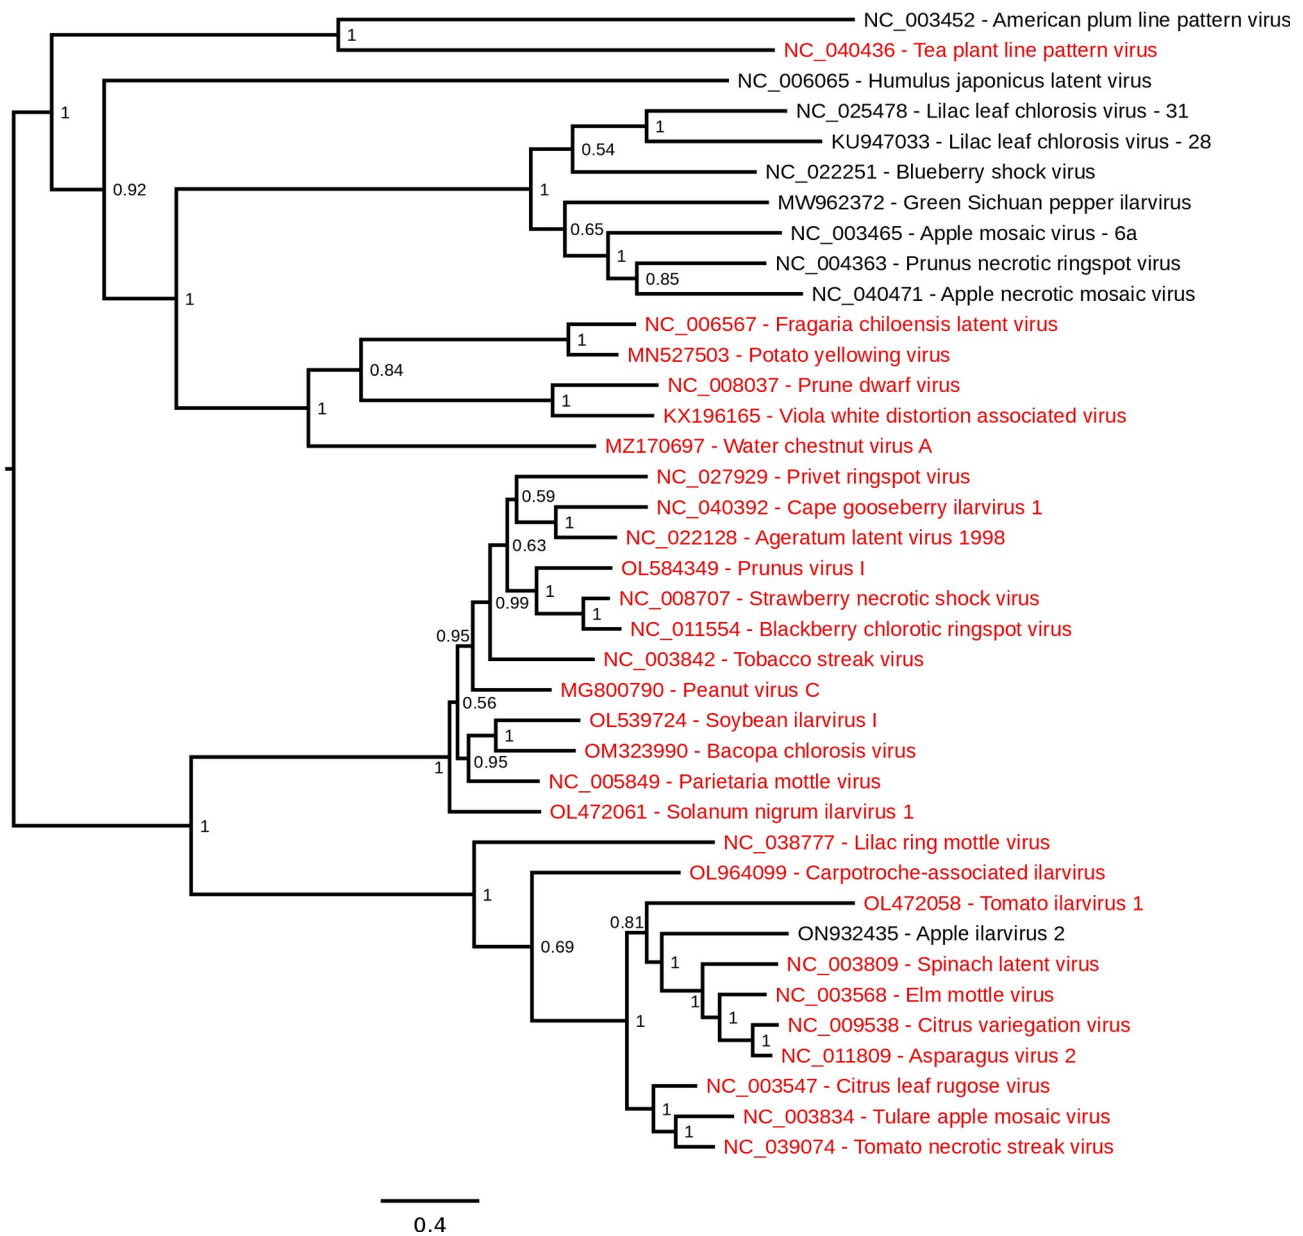

**Supplementary Figure F.** Amino acid sequences of the putative readthrough domains in the cluster reference sequences. Columns are: cluster; reference sequence accession number; readthrough peptide sequence. Sequences are ordered according to the CP phylogenetic tree (Supplementary Figure B), and clades based on the tree are separated by blank lines. In the case of NC\_008706, the peptide is shown after insertion of the frame-correcting "A" nucleotide (see Supplementary Dataset C for details). All cysteine and histidine residues are highlighted.

|            |           |                                                                                                                                                                           |
|------------|-----------|---------------------------------------------------------------------------------------------------------------------------------------------------------------------------|
| <b>37</b>  | NC_040437 | LHSGDYLSELEYDPMMSGWFLNRGVRWYYCPIPA <sup>C</sup> CVFTNGYRLGED <sup>H</sup> *                                                                                               |
| <b>6b</b>  | HG328285  | QSGSQISNIVRIFDNLDDLMEFAPYAEGA*                                                                                                                                            |
| <b>5a</b>  | NC_006568 | QLGRDISRLRDVSRRAKVPNDFIVGCEPAYDIDMCEQA <sup>H</sup> H <sup>H</sup> DGYPEVNPVAVLRPRFFSVPRTRRRSRRLNPRLVDEANLPYFTGECVRC <sup>C</sup> GYTPKSLIDQREWECSS <sup>C</sup> CYMLYAA* |
| <b>5b</b>  | MN527504  | QLGRVNTQFRVLARRVEIPGIDPRCEFDAQGS <sup>L</sup> LTFRSRSVPRVFNRRRLNPRLSKEEEEALD <sup>H</sup> FDQVDNSDGADYLDDWRSYVD*                                                          |
| <b>27</b>  | MZ170698  | LHSGGVNFDTWNGICSR <sup>C</sup> CGFKPKRLVDQYTYTCRE <sup>C</sup> CGKIYFA*                                                                                                   |
| <b>3</b>   | NC_008038 | LYDPSFDCASTMSIPRNIRSWKCC <sup>C</sup> FNRI <sup>H</sup> HSEFVTEC*                                                                                                         |
| <b>23</b>  | KX196164  | LYDPFFDCSDSANFSFLPPEEMEFKAWRCC <sup>C</sup> CNEI <sup>H</sup> HYV*                                                                                                        |
| <b>34</b>  | OL964098  | PHSGGRCLVCEVSWGLQTYTRIDDFSLRDECLYCGADAEIGLLCPSFKC <sup>C</sup> PQGCTQCL*                                                                                                  |
| <b>35</b>  | NC_038776 | PHSGSRCLVCGTWSLQTYTYLED <sup>F</sup> SLRDECLL <sup>C</sup> CGADAEIGLIC <sup>C</sup> PSFKC <sup>C</sup> PLGCTQYPC <sup>C</sup> FG*                                         |
| <b>33</b>  | OL472059  | PRSGCESCGYVPYCH <sup>C</sup> CKCYNDACSVVGCEQNIWFIPDEVFP*                                                                                                                  |
| <b>18</b>  | NC_003546 | PQDCESCGYIPYCH <sup>C</sup> CECWPYRCYTIGCNANDLWFIDS*                                                                                                                      |
| <b>17a</b> | NC_003835 | LHSGFCPVC <sup>C</sup> GYVPLCH <sup>C</sup> CMCYNSCDVIGCDANDTFCIEDDQV*                                                                                                    |
| <b>17b</b> | NC_039076 | PRSGLCQSCGFIPYCH <sup>C</sup> CYCCDDVCDVIGCLANDTVYDEV*                                                                                                                    |
| <b>13</b>  | NC_003810 | LHSDDCSSRNVIPFCH <sup>C</sup> SCCPFH <sup>C</sup> CDVIGVCNDAFFYED*                                                                                                        |
| <b>14</b>  | NC_011807 | PRSGECVYLH <sup>S</sup> NECEKKNVIPFCH <sup>C</sup> CECYDNACNTLWCPANVFC <sup>H</sup> HEP*                                                                                  |
| <b>8a</b>  | NC_009536 | LHSDDCPSQSVIPFCH <sup>C</sup> CECYDNACGTPWCPANANCF <sup>H</sup> EF <sup>H</sup> HENY*                                                                                     |
| <b>8b</b>  | NC_003570 | LHSGDYLH <sup>S</sup> VECKERKCVIPFCH <sup>C</sup> VCYDDACDVLWCSPNDLCY <sup>H</sup> HESNDW*                                                                                |
| <b>25</b>  | OL539725  | RSTSSGSELPCIMNNSCARCGFRPPYVIDQYIWSCALCH <sup>H</sup> YKH <sup>H</sup> YA*                                                                                                 |
| <b>36</b>  | MG800791  | KVAASGVVPEMPH <sup>H</sup> VDGN <sup>S</sup> CVRCGYTPKYLIDSYIWT <sup>C</sup> FMCSYEQYA*                                                                                   |
| <b>12</b>  | NC_005854 | MVVTDVSGVDANVKSDDSYQGDYDYDTDMFQYDCTDDDDGTAYMQDFFSC <sup>C</sup> VAAAMNF*                                                                                                  |
| <b>20</b>  | OM323991  | RSQSSH <sup>H</sup> DEMPH <sup>H</sup> VKNNSCVRCGFRPPQIIDQYVWRCRR <sup>C</sup> CYLEHAA*                                                                                   |
| <b>10</b>  | OL472062  | RSQVSPRLELPYFTEKCVRCGFAPKYTVDQYIWKCH <sup>H</sup> VCSYE <sup>H</sup> YA*                                                                                                  |
| <b>30</b>  | NC_022129 | LTADSSSTVDELPH <sup>H</sup> MDGN <sup>S</sup> CVRCGFTPKRIVDQYVWRCYLCDYPQMA*                                                                                               |
| <b>15</b>  | NC_040394 | LSDMPQVNELPYITNCCVRCGFKPRRVVDQLVWSCTFCLYKQRA*                                                                                                                             |
| <b>4</b>   | NC_011555 | LVNYLEENFEVPH <sup>H</sup> ILPTIVGSCVRCGFRPRRVPDARYLWCGMCKYL <sup>H</sup> YA*                                                                                             |
| <b>11</b>  | NC_008706 | LSPILEFDLELPH <sup>H</sup> IKNNSCVRCGY <sup>H</sup> PMYVVDQ <sup>H</sup> IWKCDVCH <sup>H</sup> QRHYA*                                                                     |
| <b>16</b>  | OL584350  | LLSDLDNVELPH <sup>H</sup> MRSSCVRCGFCPKYAVDQLIWRCH <sup>L</sup> CGYPHSA*                                                                                                  |
| <b>1</b>   | NC_003845 | LDGH <sup>L</sup> LGETEMPH <sup>H</sup> IDGN <sup>S</sup> CVRCGFTPRRIVDQYIWK <sup>C</sup> DICSYEQYA*                                                                      |
| <b>29</b>  | NC_027930 | LDGLVTSGRVSDLP <sup>H</sup> IDGN <sup>S</sup> CVRCGYAPRYIVDQ <sup>C</sup> YWE <sup>C</sup> TL <sup>C</sup> SYEQRA*                                                        |



**Supplementary Figure G.** Positions of start and stop codons in ilarvirus reference sequences. RNAs 1, 2 and 3 are shown at left, middle and right, respectively. For each RNA, the three tracks show the positions of stop codons (black) and AUG codons (green) in each of the three positive-sense reading frames. Note that EU919668, JN107639, KX196166 and KX196165 (at least) are not coding-complete and, in addition, various sequences are missing various amounts of the 5' and/or 3' UTR.

**Humulus japonicus latent virus**

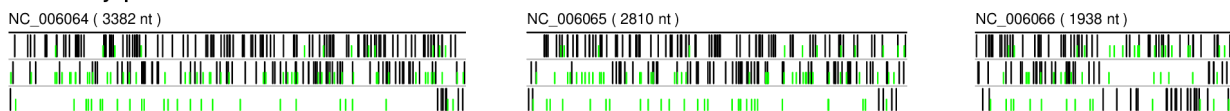

**Tea plant line pattern virus**

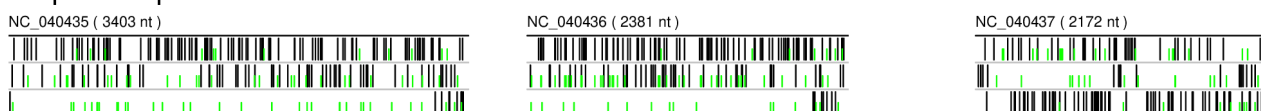

**American plum line pattern virus**

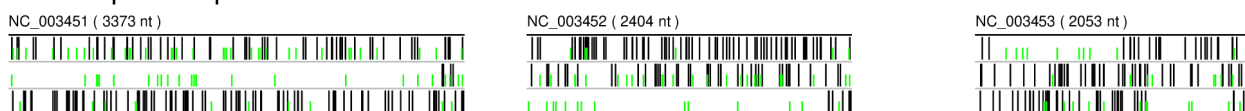

**Apple mosaic virus - 6a**

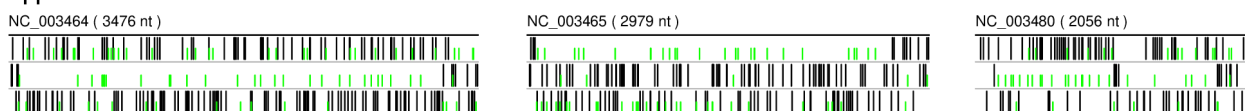

**Apple mosaic virus - 6b**

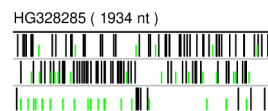

**Blueberry shock virus**

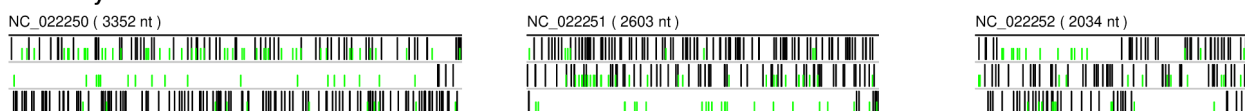

**Lilac leaf chlorosis virus - 28**

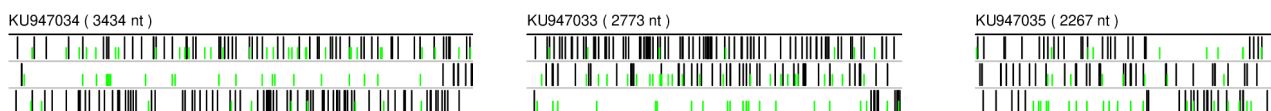

**Lilac leaf chlorosis virus - 31**

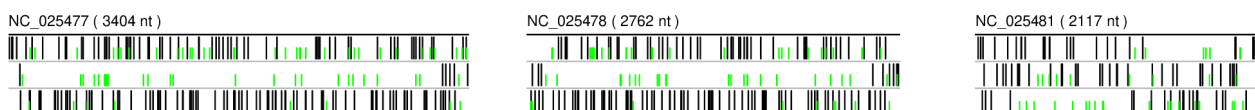

### Apple necrotic mosaic virus

NC\_040469 ( 3378 nt)

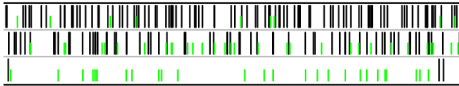

NC\_040471 ( 2767 nt)

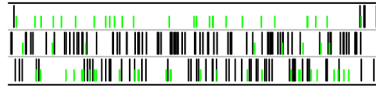

NC\_040470 ( 1956 nt)

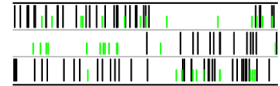

### Prunus necrotic ringspot virus

NC\_004362 ( 3332 nt)

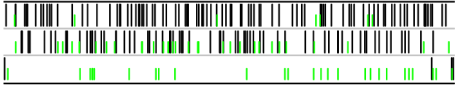

NC\_004363 ( 2591 nt)

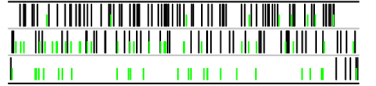

NC\_004364 ( 1957 nt)

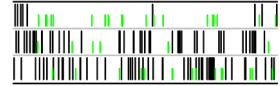

### Green Sichuan pepper ilarvirus

MW962369 ( 3295 nt)

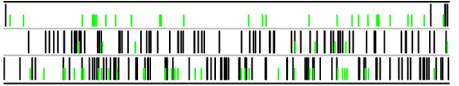

MW962372 ( 2419 nt)

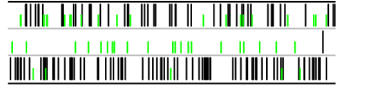

MW962375 ( 1853 nt)

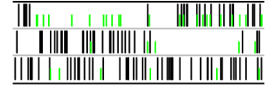

### Fragaria chiloensis latent virus

NC\_006566 ( 3431 nt)

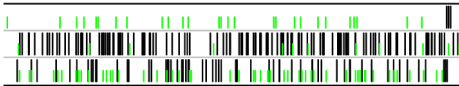

NC\_006567 ( 2570 nt)

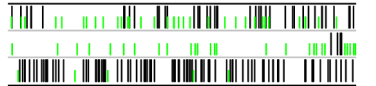

NC\_006568 ( 2484 nt)

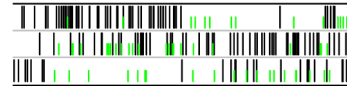

### Potato yellowing virus

MN527502 ( 3472 nt)

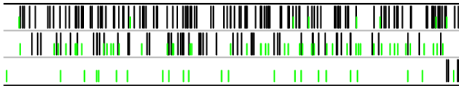

MN527503 ( 2565 nt)

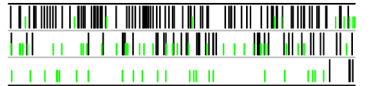

MN527504 ( 2380 nt)

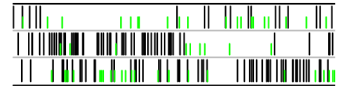

### Water chestnut virus A

MZ170696 ( 3578 nt)

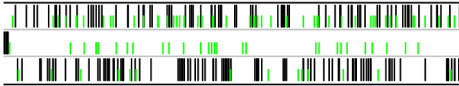

MZ170697 ( 2873 nt)

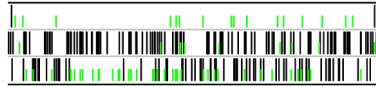

MZ170698 ( 2073 nt)

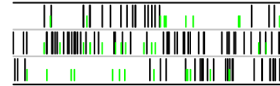

### Prune dwarf virus

NC\_008039 ( 3374 nt)

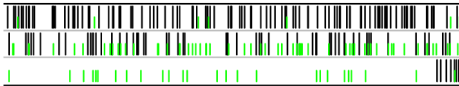

NC\_008037 ( 2593 nt)

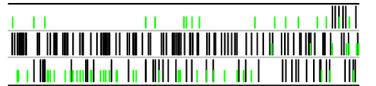

NC\_008038 ( 2129 nt)

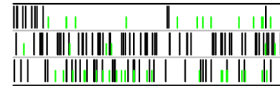

### Viola white distortion associated virus

KX196166 ( 3320 nt)

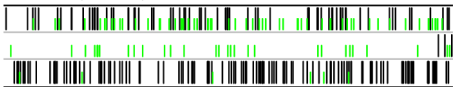

KX196165 ( 2581 nt)

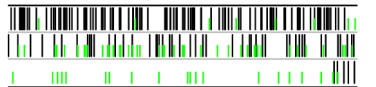

KX196164 ( 2104 nt)

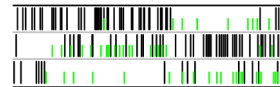

### Carpotroche-associated ilarvirus

OL964100 ( 3467 nt)

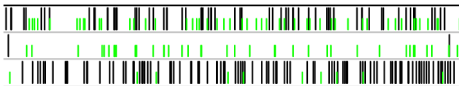

OL964099 ( 2954 nt)

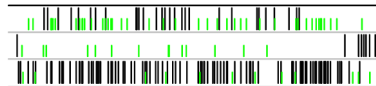

OL964098 ( 2442 nt)

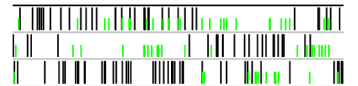

### Lilac ring mottle virus

EU919668 ( 2031 nt)

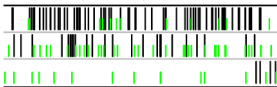

NC\_038777 ( 2821 nt)

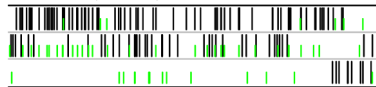

NC\_038776 ( 2287 nt)

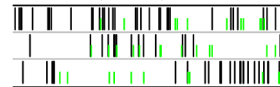

### Tomato ilarvirus 1

OL472057 ( 3392 nt)

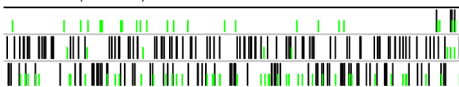

OL472058 ( 2866 nt)

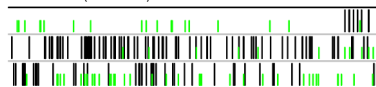

OL472059 ( 2181 nt)

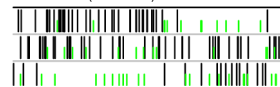

**Citrus leaf rugose virus**

NC\_003548 ( 3404 nt )

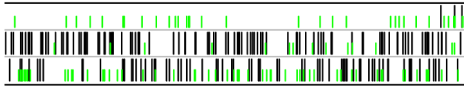

NC\_003547 ( 2990 nt )

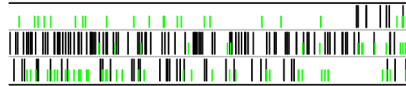

NC\_003546 ( 2289 nt )

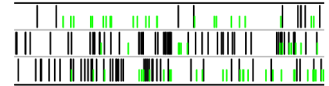

**Tulare apple mosaic virus**

NC\_003833 ( 3459 nt )

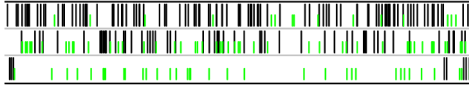

NC\_003834 ( 2944 nt )

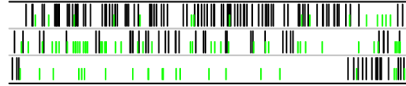

NC\_003835 ( 2229 nt )

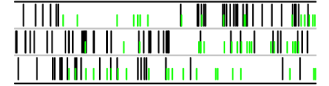

**Tomato necrotic streak virus**

NC\_039075 ( 3378 nt )

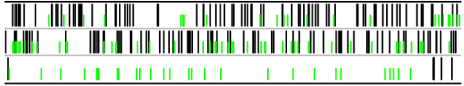

NC\_039074 ( 3024 nt )

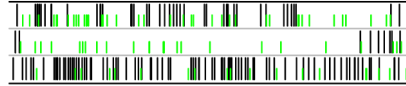

NC\_039076 ( 2219 nt )

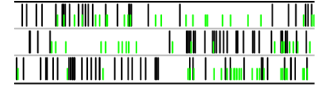

**Spinach latent virus**

NC\_003808 ( 3439 nt )

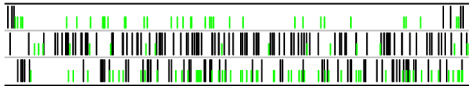

NC\_003809 ( 2939 nt )

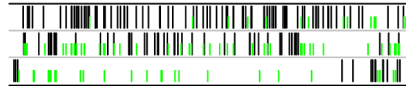

NC\_003810 ( 2310 nt )

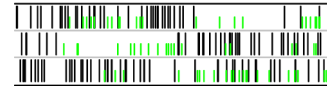

**Asparagus virus 2**

NC\_011808 ( 3431 nt )

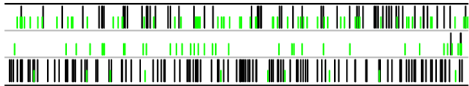

NC\_011809 ( 2916 nt )

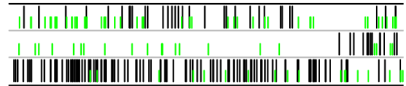

NC\_011807 ( 2307 nt )

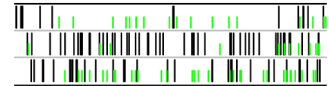

**Citrus variegation virus**

NC\_009537 ( 3433 nt )

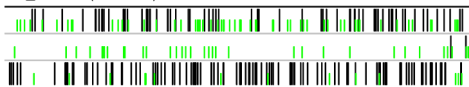

NC\_009538 ( 2914 nt )

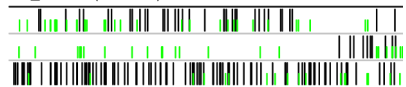

NC\_009536 ( 2309 nt )

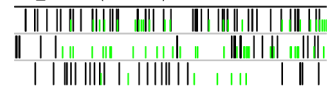

**Elm mottle virus**

NC\_003569 ( 3431 nt )

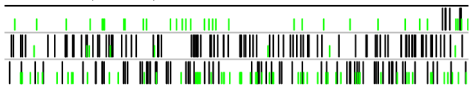

NC\_003568 ( 2874 nt )

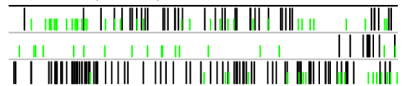

NC\_003570 ( 2315 nt )

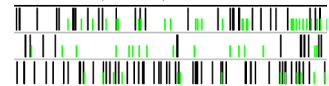

**Apple ilarvirus 2**

ON932434 ( 3456 nt )

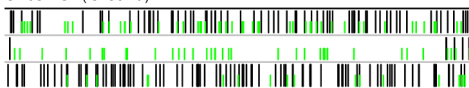

ON932435 ( 2913 nt )

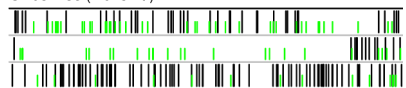

ON932436 ( 2269 nt )

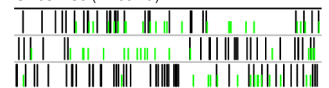

**Apple ilarvirus 1**

MN386958 ( 2124 nt )

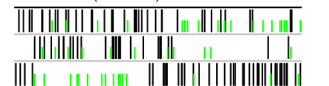

**Raphanus latent virus**

JN107639 ( 1350 nt )

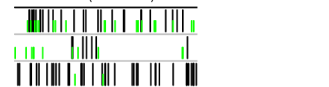

**Soybean ilarvirus I**

OL539723 ( 3466 nt )

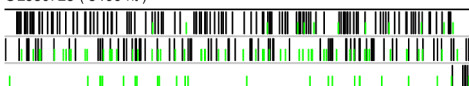

OL539724 ( 2955 nt )

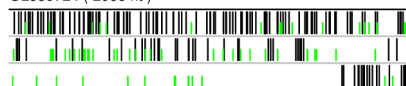

OL539725 ( 2327 nt )

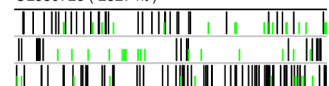





**Supplementary Figure H.** RNA-seq analysis of AV2 and AV2-2st viruses. *N. benthamiana* plants were agroinfected with AV2 or AV2-2st, and systemically infected leaves were harvested at 7 dpi for RNA-seq. Libraries were generated for three separate plants for each virus. Note these samples are not paired with the Ribo-seq samples. **(i)** RNA-seq density on the AV2 and AV2-2st genomes. Green – read coverage of vRNA(+); brown – read coverage of vRNA(-) (scaled 100×). **(ii)** Mean RNA-seq density for each segment relative to RNA 2.

(i)

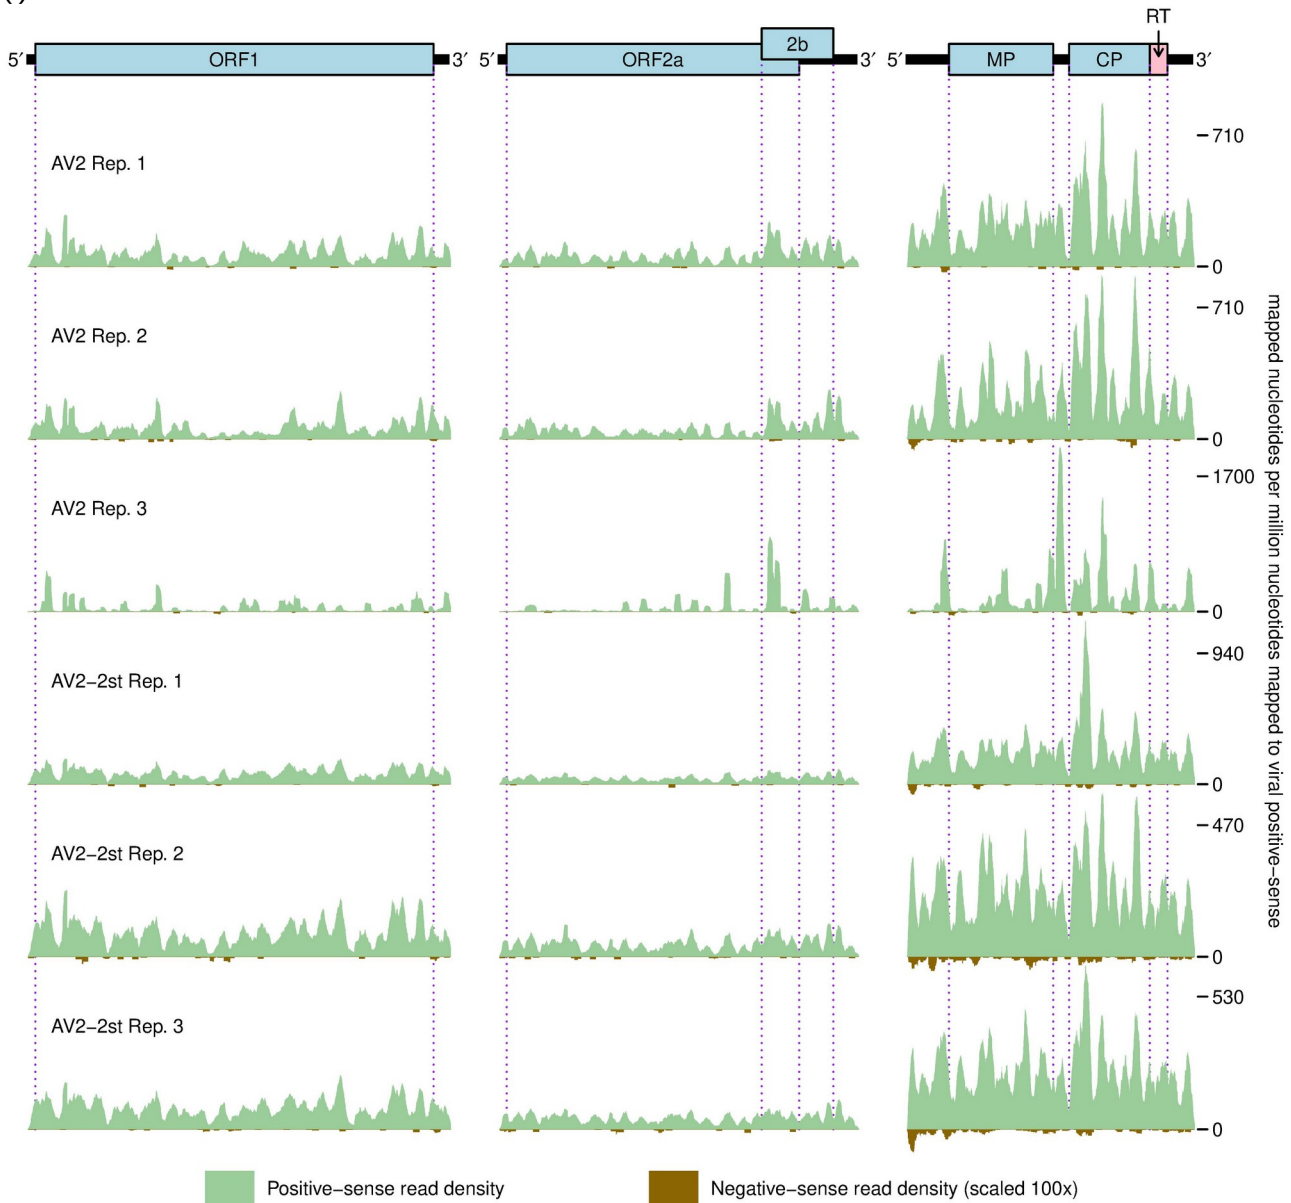

(ii)

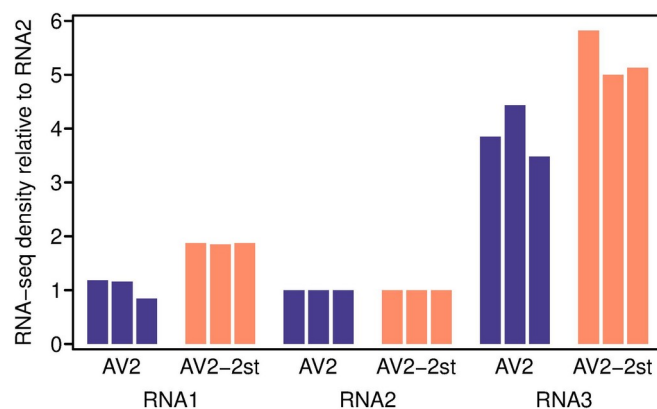

**Supplementary Figure I.** Detection of CP and CP-RT-HA by western blot. **(i)** Plants were infected with AV2 or AV2-HA, and samples were collected from the inoculated leaf and 2nd non-inoculated leaf at 4 dpi and 7 dpi, and from the 3rd non-inoculated leaf at 14 dpi. **(ii)** Plants were infected with AV2, AV2-HA or AV2-2st-HA, and samples were collected from the 2nd non-inoculated leaf at 4 dpi. Sizes of molecular weight markers are indicated on the right. Ponceau red staining (lower panels) of the large Rubisco subunit (RbcL) was used as a loading control.

(i)

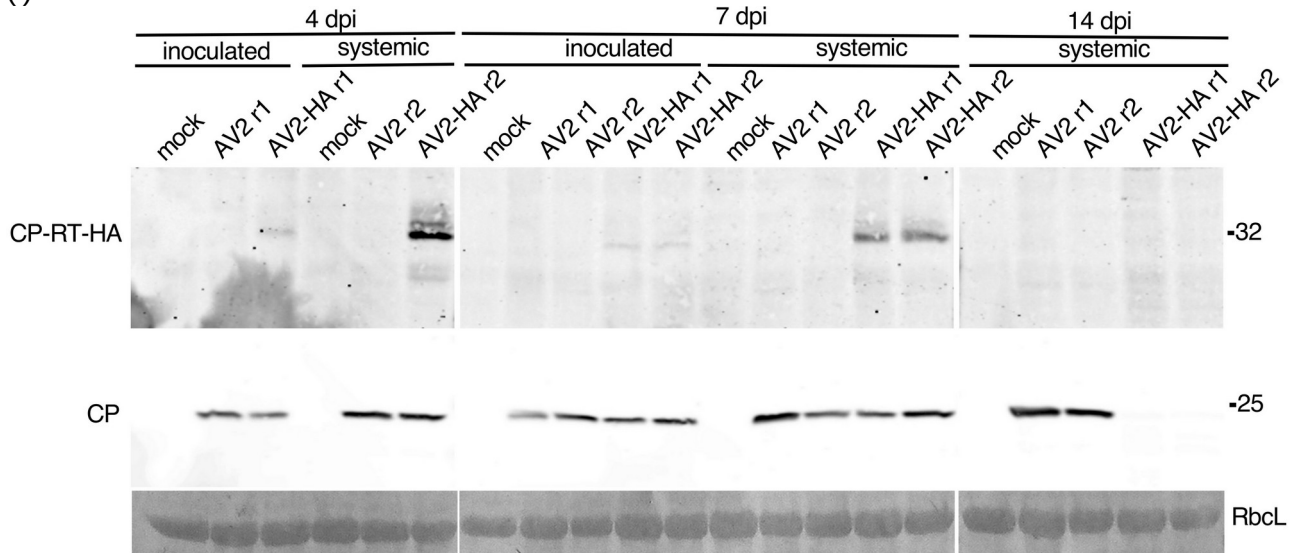

(ii)

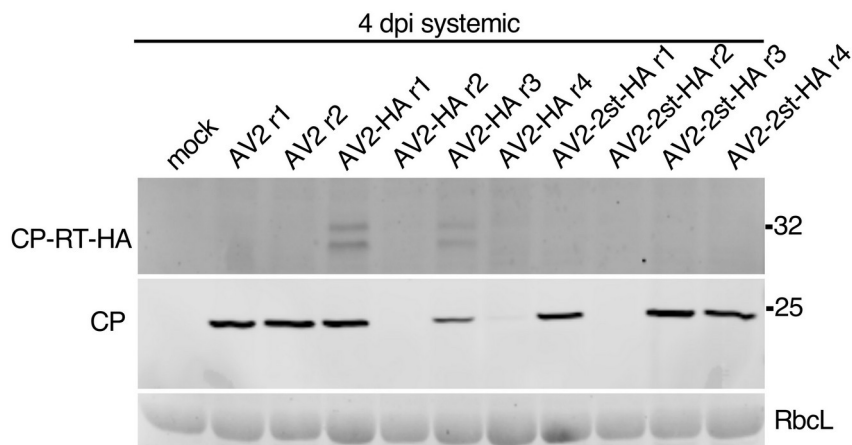

**Supplementary Figure J.** Quality assessment of ribosome profiling samples for *Nicotiana benthamiana* agroinfected with AV2 or AV2-2st. **(i)** Phasing of 5' ends of 27-nt and 28-nt RPFs that map to the viral ORFs (excluding dual coding regions) or host mRNA coding regions. **(ii)** Histograms of approximate P-site positions of 27-nt and 28-nt RPFs relative to annotated initiation and termination sites summed over all host mRNAs.

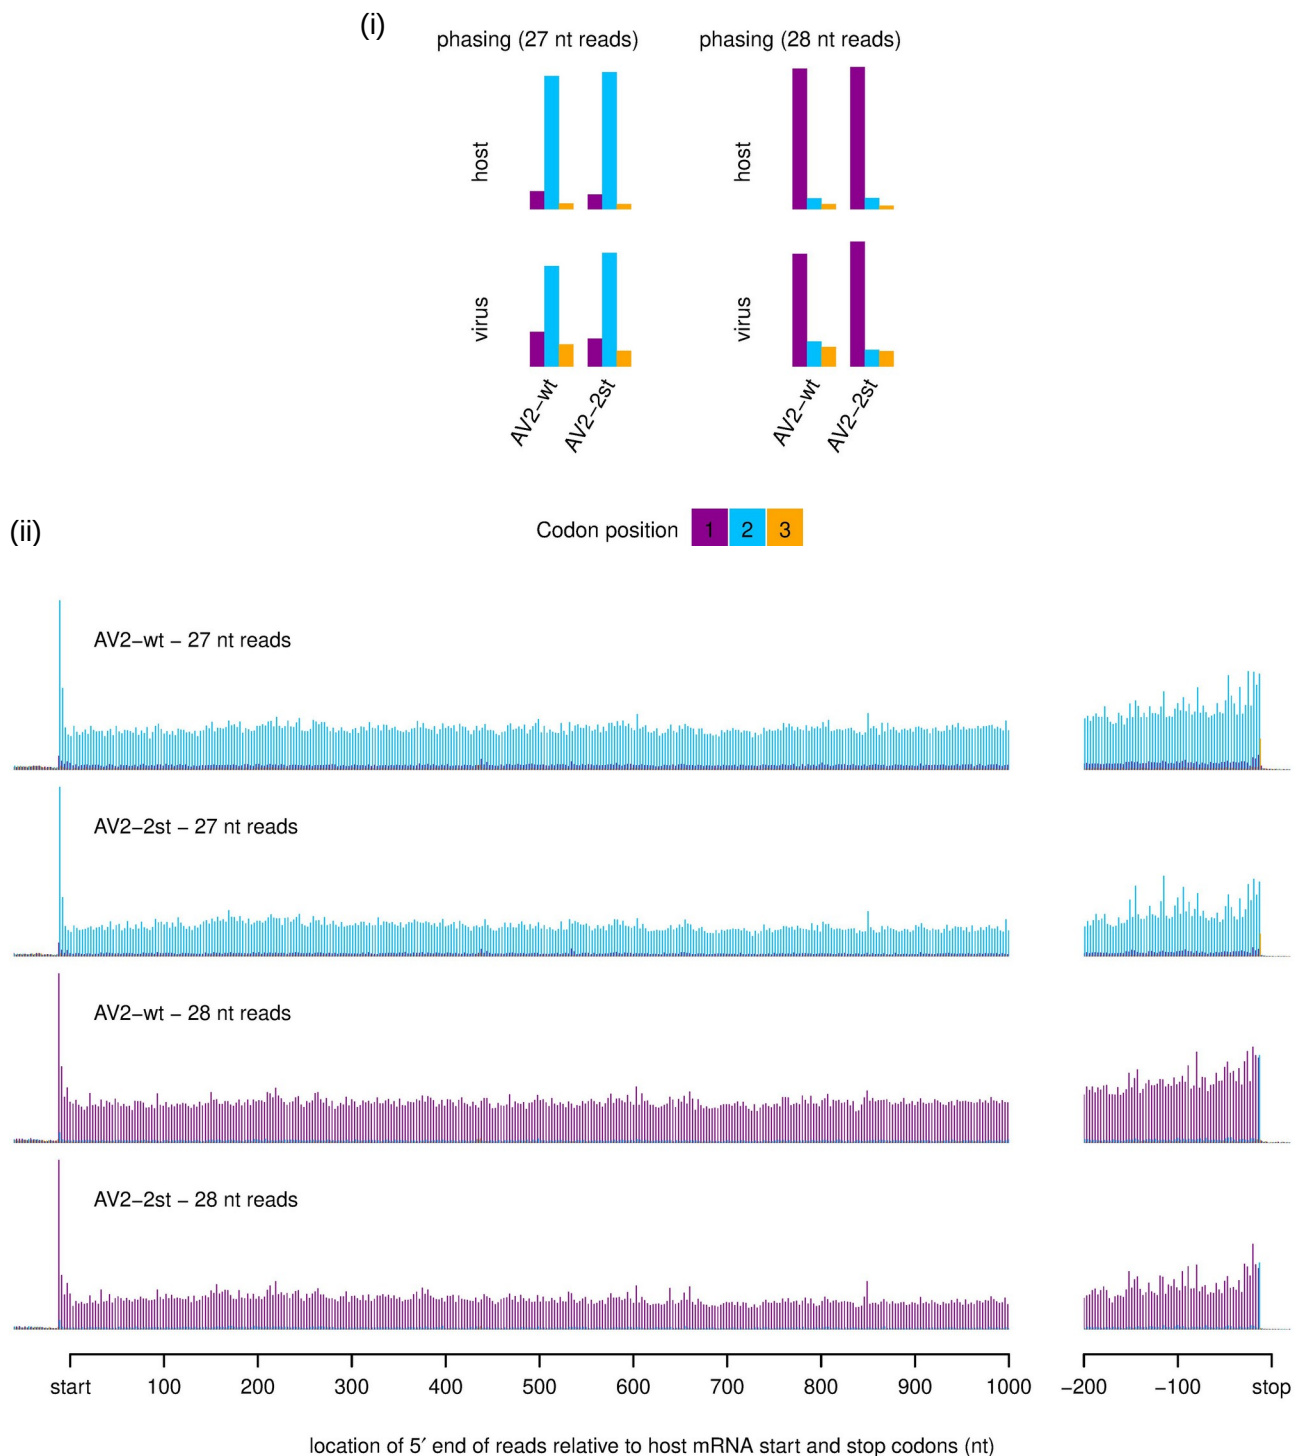

**Supplementary Figure K.** Distribution of 27 nt ribosome profiling reads on the AV2 and AV2-2st genomes. *N. benthamiana* plants were agroinfected with AV2 or AV2-2st, and systemically infected leaves were harvested at 12 dpi for Ribo-seq. Histograms show the positions of the 5' ends of reads, with a +12 nt offset to map approximate P-site positions. Colours purple, blue and orange indicate the three different phases relative to the reading frame of ORFs 1, 2a and CP in RNAs 1, 2 and 3 respectively. Therefore, consistent with Supplementary Figure J(i), most 27 nt reads map to the blue phase in ORFs 1, 2a, and CP as well as MP; reads map predominantly to the yellow phase in ORF2b, and true RPF reads are expected to map to the blue phase in the RT ORF. Note that nucleotide-to-nucleotide variation in RPF counts may be influenced by technical biases besides ribosome codon dwell-times. Reads in the 3'UTR and a fraction of reads throughout the genome undoubtedly derive from non-RPF contamination, and contamination is likely to be relatively more pronounced in the lowly expressed AV2-2st (cf. Supplementary Table C). Reads that map to the 3'UTR sequences that are shared between all three RNAs cannot be assigned to a specific RNA; the mapping algorithm, bowtie [5], assigns such multimapping reads at random; thus many reads that probably arise from the highly expressed RNA3 3'UTR would be mismapped to the lowly expressed RNA1 and RNA2 3'UTRs. Therefore, for each RNA, 3'UTR peaks have been truncated to a maximum of 1.25 times the peak value outside of the 3'UTR conserved-sequence region.

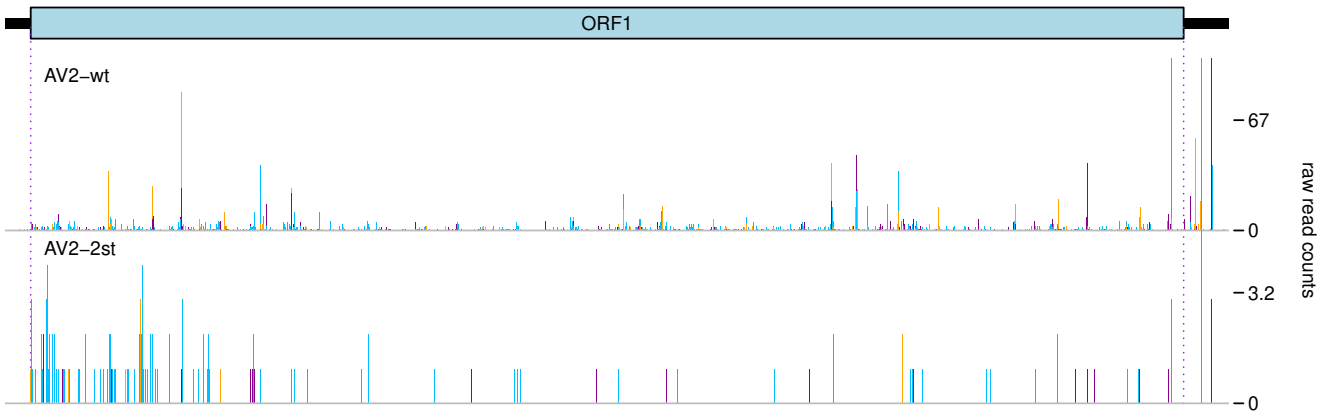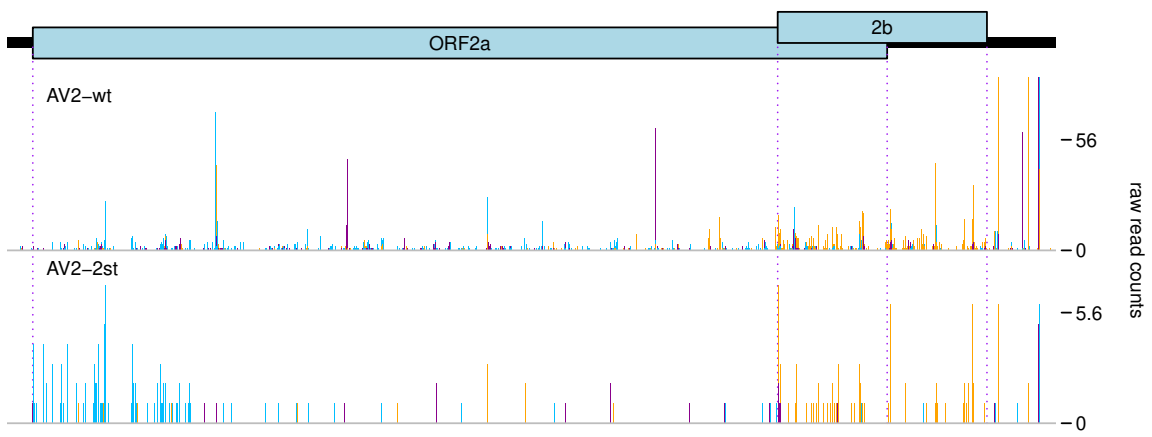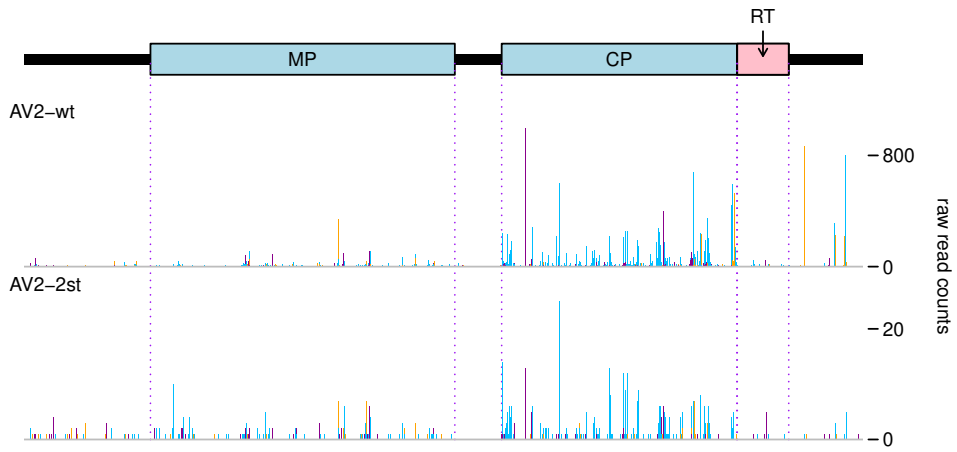

Codon position 1 2 3

27 nt reads

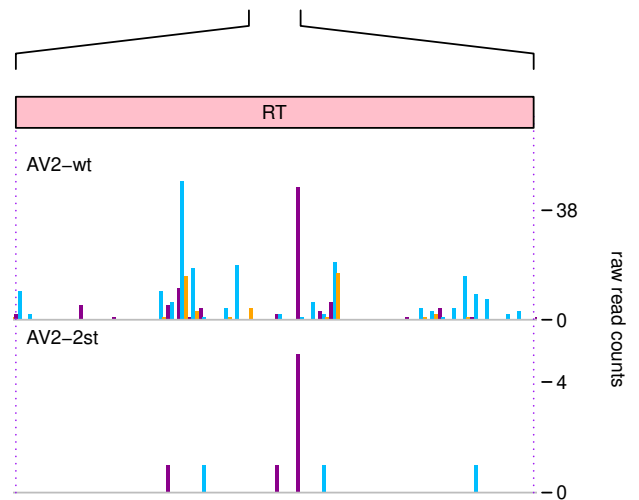

**Supplementary Figure L.** Distribution of 28 nt ribosome profiling reads on the AV2 and AV2-2st genomes. *N. benthamiana* plants were agroinfected with AV2 or AV2-2st, and systemically infected leaves were harvested at 12 dpi for Ribo-seq. Histograms show the positions of the 5' ends of reads, with a +12 nt offset to map approximate P-site positions. Colours purple, blue and orange indicate the three different phases relative to the reading frame of ORFs 1, 2a and CP in RNAs 1, 2 and 3 respectively. Therefore, consistent with Supplementary Figure J(i), most 28 nt reads map to the purple phase in ORFs 1, 2a, and CP as well as MP; reads map predominantly to the blue phase in ORF2b, and true RPF reads are expected to map to the purple phase in the RT ORF. See the Supplementary Figure K caption for additional details.

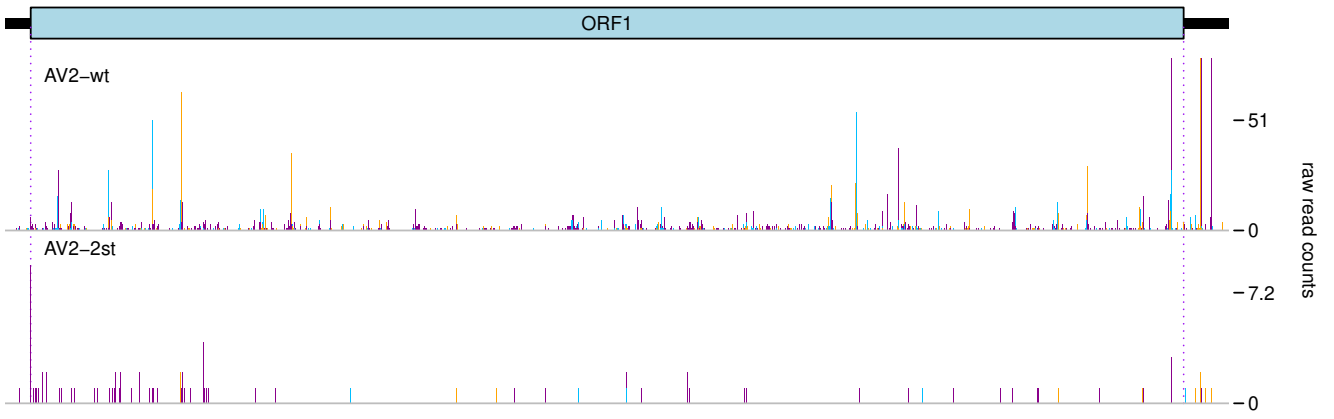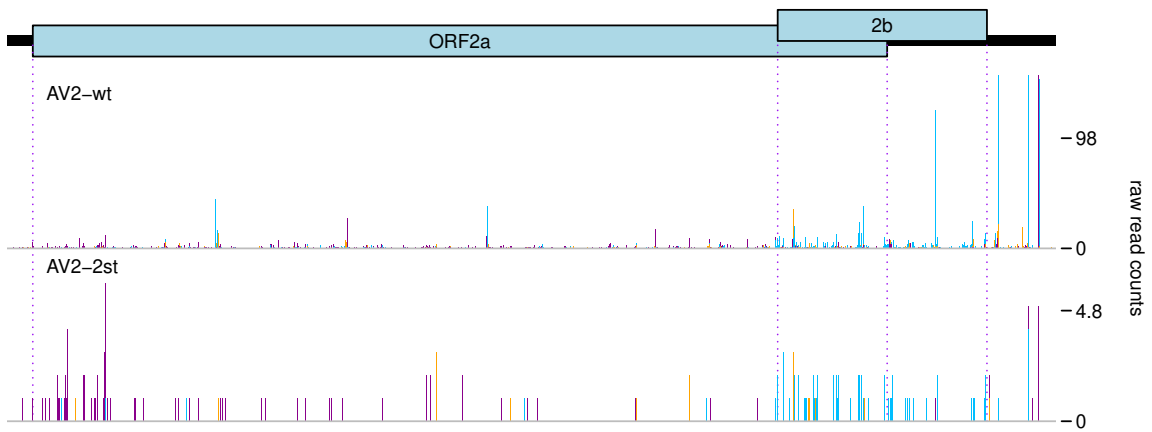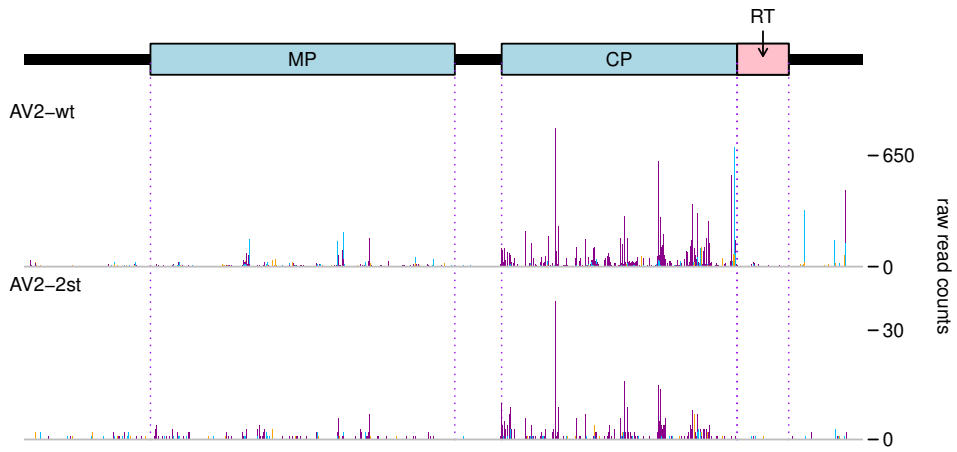

Codon position 1 2 3

28 nt reads

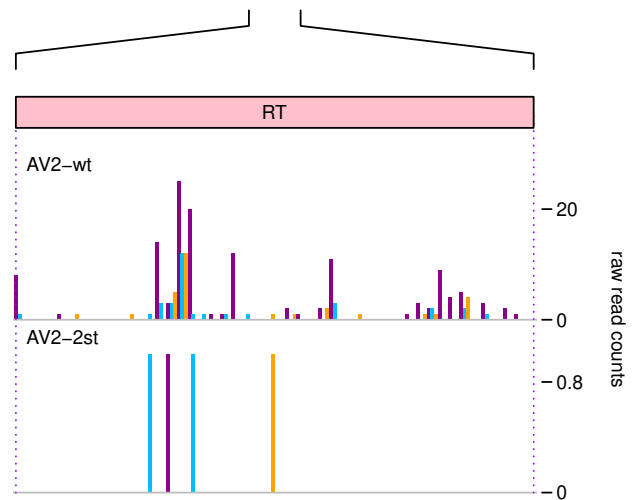



**Supplementary Figure M.** Detection of AV2 CP by western blot in plants infected with AV2. Samples were collected from the upper leaves at 47 dpi. Sizes of molecular weight markers are indicated on the right. Ponceau red staining of the large Rubisco subunit (RbcL) was used as a loading control.

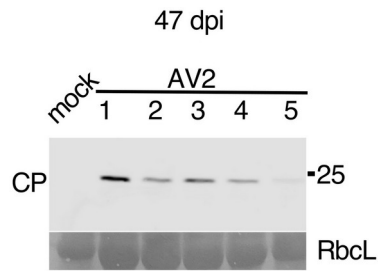

**Supplementary Figure N.** Detection of CP by western blot in wild type *N. benthamiana* (upper panels) and RDR6i *N. benthamiana* (lower panels) infected by AV2, AV2-2st, AV2-mutZF, AV2-st2b, AV2-st2b-2st or AV2-st2b-mutZF. Samples were collected from the 2nd non-inoculated leaf at 7 dpi and from the 3rd non-inoculated leaf at 14 dpi. Sizes of molecular weight markers are indicated on the right. Ponceau red staining of the large Rubisco subunit (RbcL) was used as a loading control.

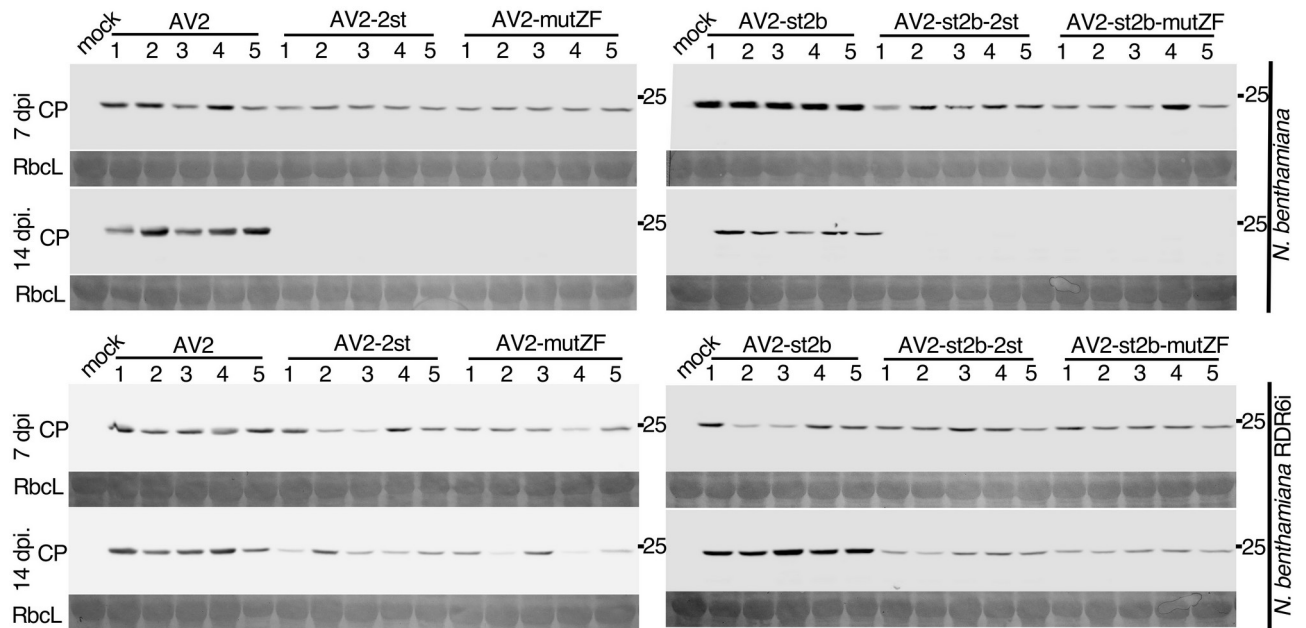

**Supplementary Figure O.** The number of 22 nt, 24 nt and all reads mapping to each RNA, divided by the number of virus mapping reads in the replicate, for each replicate, time point and treatment, for AV2 and AV2-2st infected samples. RNA1 is shown in black and at the bottom of each bar, RNA2 in cyan and in the centre, RNA3 in orange and at the top.

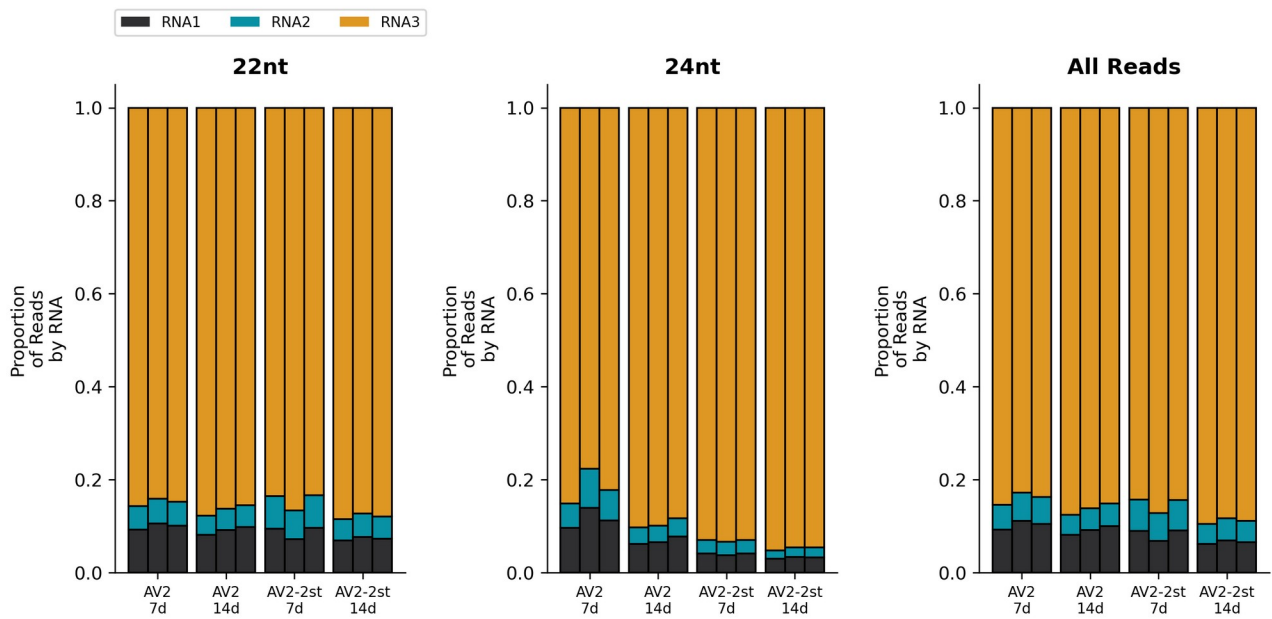

**Supplementary Figure P. (i)** The proportion of 21 nt, 22 nt, 24 nt and all reads which mapped to the host (bottom section of each bar, light colours), virus (middle section, dark colours) and was unmapped for each sample (top section, grey), separated by treatment, time point and replicate. **(ii)** The raw number of reads mapping to the each strand of the host and the virus, plus the number of unmapped reads (unstranded but shown as "+") for each replicate, treatment and time point.

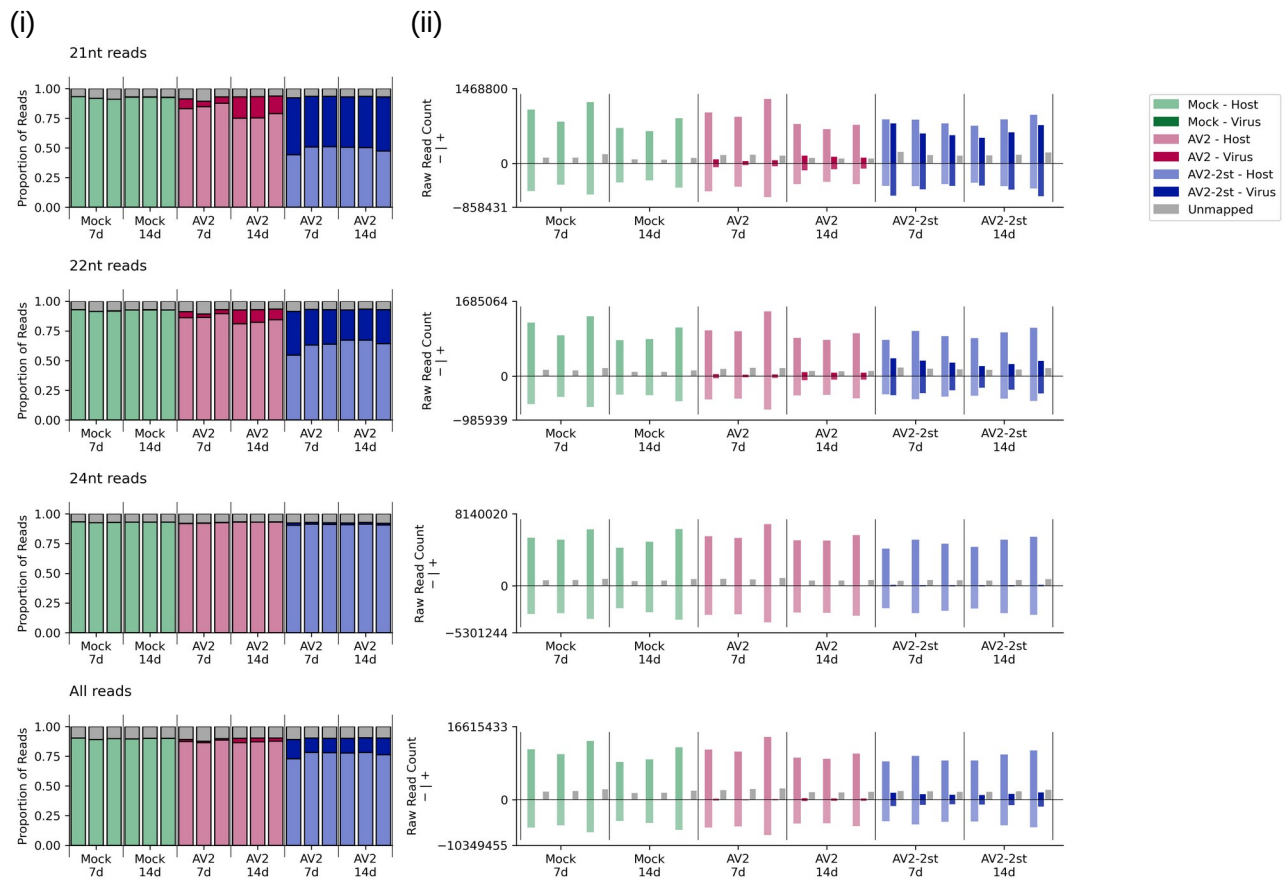

**Supplementary Figure Q.** The number of virus mapped 21 nt, 22 nt, 24 nt and all reads, with each possible 5-terminal nucleotide for AV2 and AV2-2st infected samples, for each timepoint, divided by the total number of virus mapped reads for the corresponding read length, sample and timepoint.

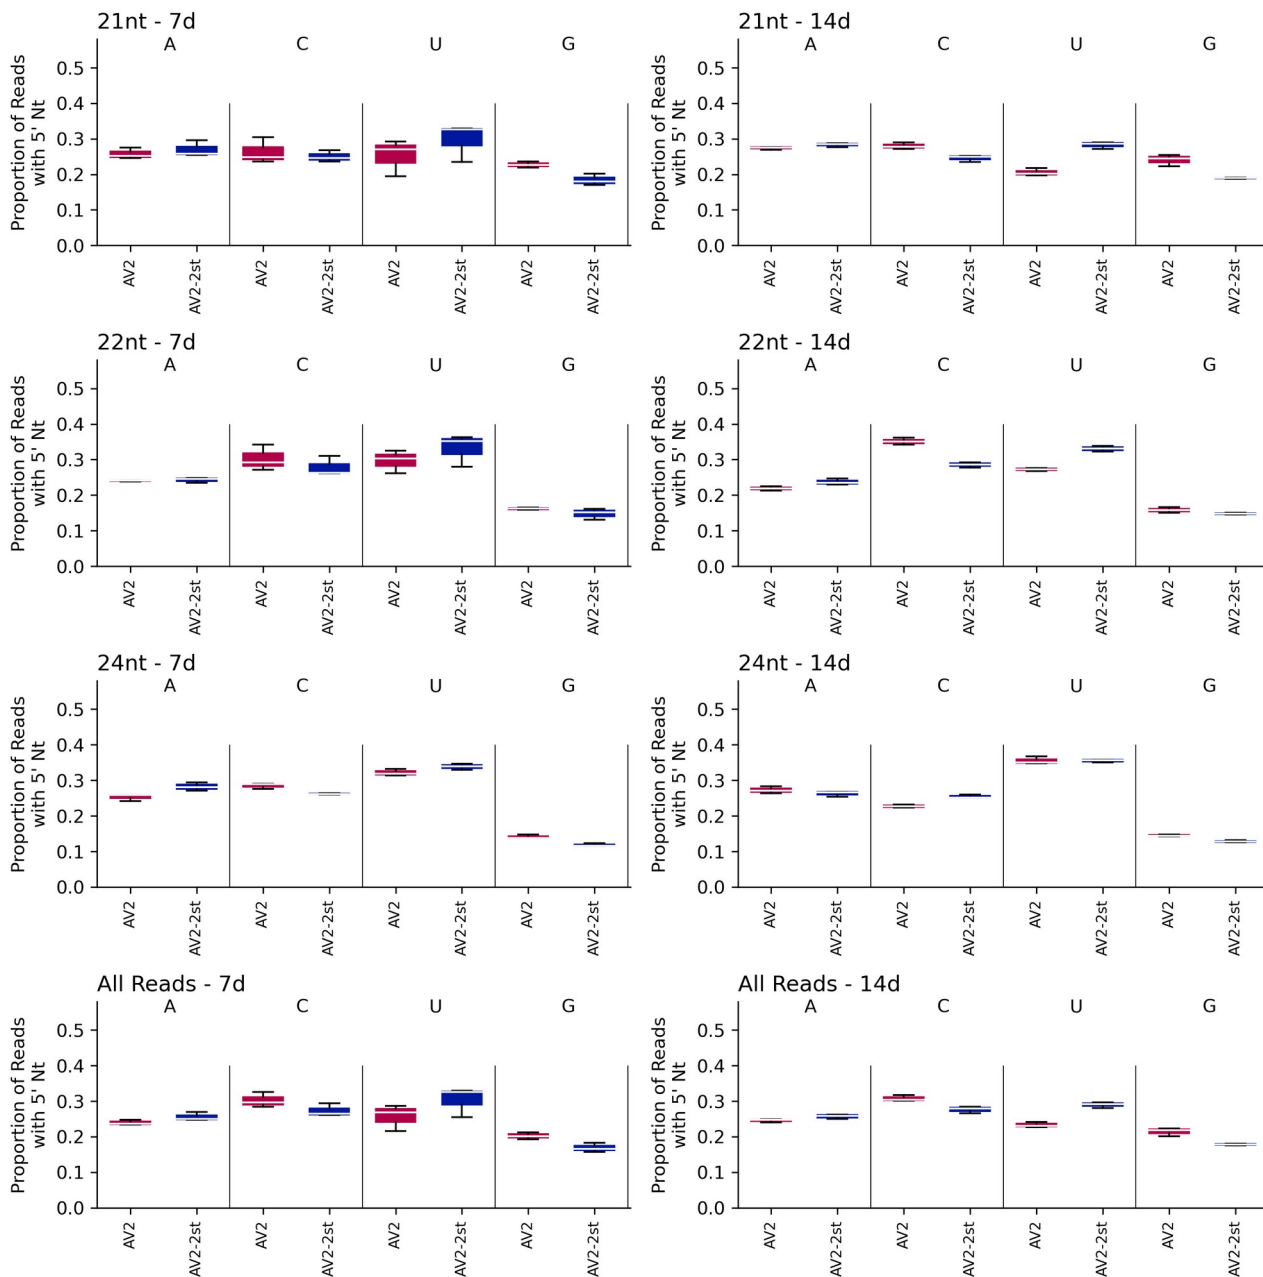

**Supplementary Figure R.** The normalised number of 22 nt, 24 nt and all reads (shown as one line per replicate, left y axis) and the proportion of all reads of this length mapping to this RNA (shaded and summed across replicates, right y axis) spanning each position in the viral genome across RNA1 (left), RNA2 (middle) and RNA3 (right). Both annotations are smoothed with a 100 nt sliding window. AV2 infected samples are shown in red and AV2-2st infected samples in blue. Positive-sense reads are shown above the axis and negative-sense reads are shown below the axis. Note, reads that map to the conserved 3' regions may be assigned at random to one of the three segments, potentially leading to an apparent over-abundance in RNAs 1 and 2 due to mismapping of reads that actually derive from the more abundant RNA3. **(i)** 22 nt reads, 7 dpi. **(ii)** 22 nt reads, 14 dpi. **(iii)** 24 nt reads, 7 dpi. **(iv)** 24 nt reads, 14 dpi. **(v)** All reads, 7 dpi. **(vi)** All reads, 14 dpi.

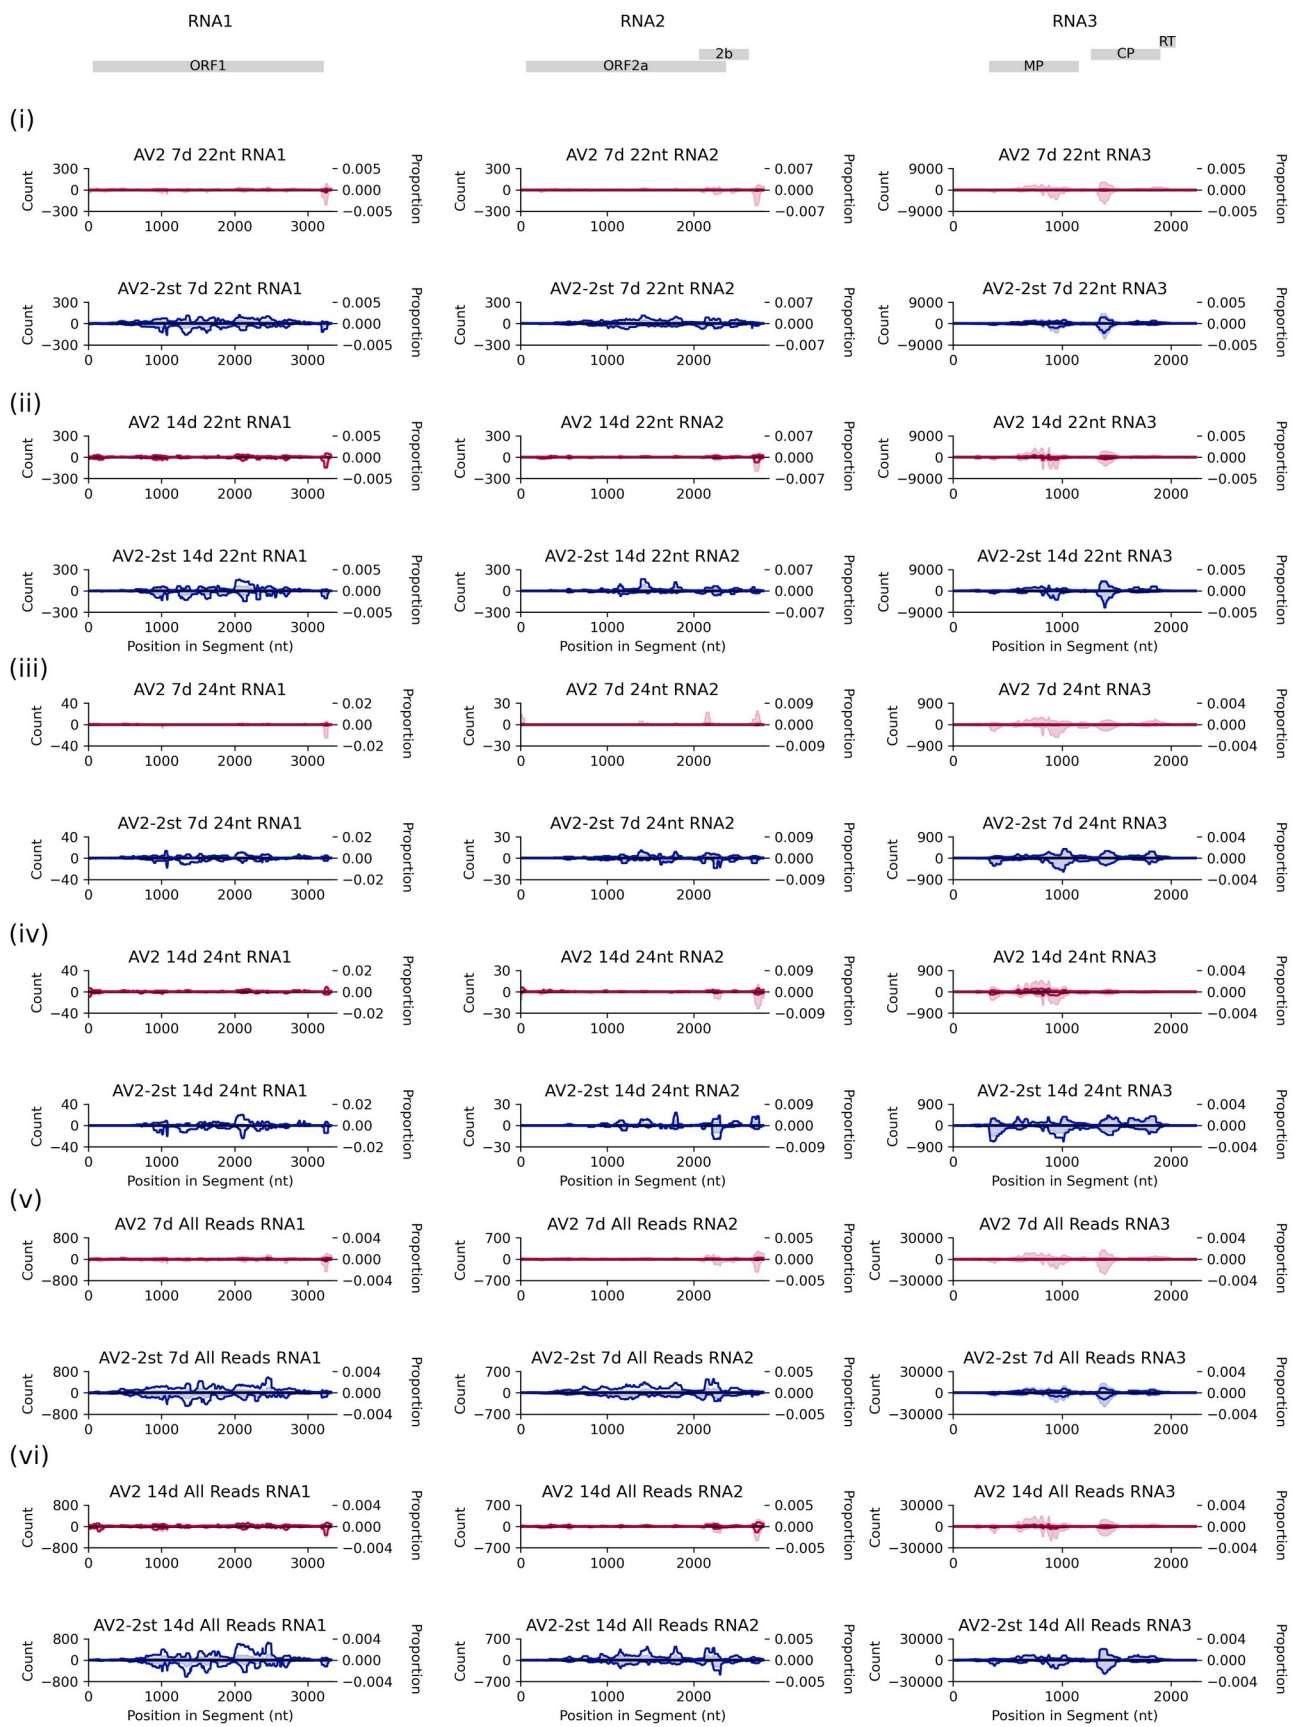

**Supplementary Figure S.** The number of 21 nt reads mapping to miRNAs in our “curated” miRNA set, normalised as reads per million host mapped reads, for mock, AV2 and AV2-2st infected samples, for each treatment, time point and replicate.

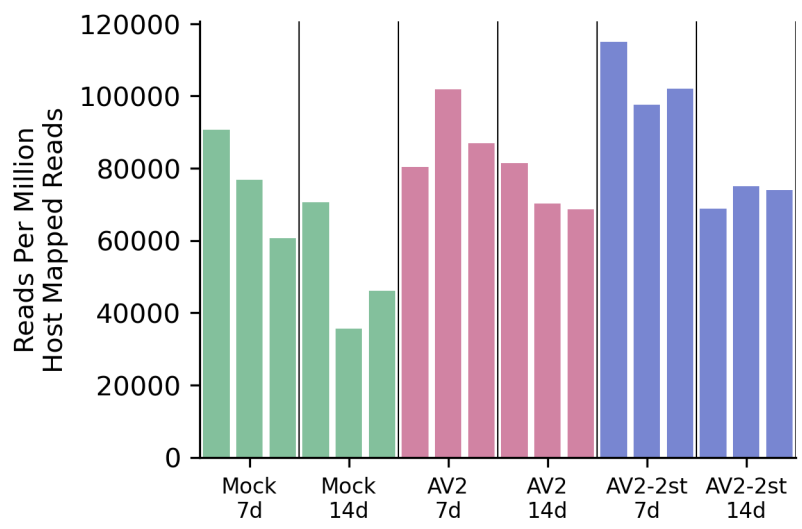







**Read through domain and 3'UTR**

OL472059 UGCCUGGGUUGAAACCACCACCGAAUUUCUAGUAUGCGAG-----GAAUGACCAC  
NC\_003546 UACCUUGUAUAAGCCUCCGCCUAUUUCCUGUAUGUGAGAUGGAUGAUAAGACCAC  
NC\_003835 UUCCUGGUGUGAAGCCUCCAGCAAACUUUUUAGUUUGUGAG-----GAGUGACUAC  
NC\_039076 UACCUUGGUGUGAAGCCUCCUCAAAACUUUUUGGUUUGUGAG-----GAGUGACCAC  
NC\_009536 UUCCUGGUGUGAAGCCACCAAGCAAUUUCUUGGUUUGUUGAA-----GAAUGACUAC  
NC\_003810 UACCGGGAGUGAAGCCACCAAGUAUUUCUUGGUUGUGUGAG-----GAUUGACUAC  
NC\_003570 UUCCAGGCGUGAAGCCACCAGCAAUUUCUUGGUUUGUUGAG-----GAAUGACUAC  
NC\_011807 UACCCGGUGUGAAGCCACCAAGUAUUUCUUGGUUUGUUGAG-----GAAUGACCAC  
\* \* \* \* \* \* \* \* \* \* \* \* \* \* \* \* \* \* \* \* \* \* \* \* \* \* \* \* \* \* \* \* \* \* \* \* \* \* \* \* \* \*

**CP stop**

OL472059 GCUCGGGG-----UGUGAAUCGUGUGGUUAUGUACCAU  
NC\_003546 A--AGAU-----UGUGAAUCUUGUGGUUAUAUUCCAU  
NC\_003835 ACUCGGGCUUU-----UGUCCGUGUGUGGUUAUGUACCAC  
NC\_039076 GCUCGGGCUUA-----UGCCAGAGUUGGGAUUUAUUCCAU  
NC\_009536 ACUCGGACGAU-----UGUCCGAGUCAAGUGUCAUCCUU  
NC\_003810 ACUCGGGGAU-----UACCUCAUUCUGUUGAUGGAGAGGAAGUGUGAUUCCAU  
NC\_003570 ACUCGGGUGAU-----UACCUCAUUCUGUUGAUGGAGAGGAAGUGUGAUUCCAU  
NC\_011807 GCUCGGGUGAGUGUGUAUACCUCAUUCUAAUGAUGUGAGAAGAAAUGUGAUUCCAU  
\* \* \* \* \* \* \* \* \* \* \* \* \* \* \* \* \* \* \* \* \* \* \* \* \* \* \* \* \* \* \* \* \* \* \* \* \* \* \* \* \* \*

OL472059 AUUGCCAUUGUAAUGCUACAAUGAUGCCUGCUCAGUGGUUGGUUGUGAGCAGAAUAUCU  
NC\_003546 ACUGCCACUGUGAAUUGGCCGACAGAUAGCUACACCAUUGGGUGUAUGCUAAUGAUC  
NC\_003835 UUUGUCAUUGUAUGUGCUACAAUACUCAUGUGAUGUCAUUGGUUGUGAUGCCAAUGAU  
NC\_039076 AUUGUCAUUGUUAUUGGUUGCAGACGUAUGUGAUGUCAUUGGAUGUUUAGCCAAUGAU  
NC\_009536 UCUGUCAUUGCGAAUGUUAUGACAUGCUUGCGGUACACCUUGGUGUCCUGCUAAUGCCA  
NC\_003810 UUUGCCAUUGCUCUUGGUUGCCUUUUCACUGUGAUGUGAUGGAUGUGUGCAUUGAUG  
NC\_003570 UCUGUCAUUGCGUGUGCUAUGACGAUGCUUGCGAUGUUUUUGGUUGUCCCCAAUUGAU  
NC\_011807 UCUGUCAUUGGAUUGUUAUGACAUGCUUGCAACACCUUGGUGGUUCCUGCAAUUGUCU  
\* \* \* \* \* \* \* \* \* \* \* \* \* \* \* \* \* \* \* \* \* \* \* \* \* \* \* \* \* \* \* \* \* \* \* \* \* \* \* \* \* \*

**RT stop**

((((

OL472059 GGUUUAUACCGAUG-----AAGUUUCCAUA--GAACCUUAUC  
NC\_003546 UAUGUUUAUAGAUUCUA-----AAGUCACUUCUGUG--AGCUAUG  
NC\_003835 CCUUCUGUAUAGAAGAUGAUC-----AAGUGUAACAUUCAUGUUAUACUAGCG  
NC\_039076 CCGUCUAUGACG-----AAGUGUAACAUUCAUGUUAUACUAGUG  
NC\_009536 AUUGUUUCCAUGAAUUUCAUGAAUUUAUGAUGACGUGUU-CUUUCAUAGAUAUAGCA  
NC\_003810 CUUUCUUUACGAAGAU-----UAGUGUU-CUUUCAUGGAACCUUGGUA  
NC\_003570 UAUGUUAACACGAGUCUAUAGACUGGUAUGU--UAGUGUUUUUUAUGAAACCUAUGUG  
NC\_011807 UUUUUUCCACGAACCUUA--AUGGUUAGUGAUGAAGUGUUUUUUAUGAAACCUAUGUG  
\* \* \* \* \* \* \* \* \* \* \* \* \* \* \* \* \* \* \* \* \* \* \* \* \* \* \* \* \* \* \* \* \* \* \* \* \* \* \* \* \* \*

((((( ())) ))))

OL472059 AGACGUCUUCAGGGAUGUACUAAAGUACUCGGUCUGAUGAAAUCAUAUGCCUAGU--CG  
NC\_003546 AAGGCCUCCGCGGUGUGCUCAGCACUUAACCUAAGUCAAGUUAUAUGCCACCUUUG  
NC\_003835 AAGGUCCUCCGGAUGUGCUCAGCACCUCAGCCUUAAGCUAAGUUAUAUGCCACCUUUG  
NC\_039076 AAGGUCCUCCGGAUGUGCUCAGCACCUCAGCCUUAAGCUAAGUUAUAUGCCACCUUUG  
NC\_009536 AAGGACCCUACGCGGUGCUCAGUGCUAGUCUACGCUAAGUUAUAUGCCACCUUUG  
NC\_003810 AAGGUCCUCCGGAUGUGCUCAGCACCUCAGCCUUAAGCUAAGUUAUAUGCCACCUUUG  
NC\_003570 AAGGAUCCUCCGGAUGUGCUCAGCACCUCAGCCUUAAGCUAAGUUAUAUGCCACCUUUG  
NC\_011807 AAGGU-CUCGCGGAUK-GCUCAGCACCUCAGCCUUAAGCUAAGUUAUAUGCCACCUUUG  
\* \* \* \* \* \* \* \* \* \* \* \* \* \* \* \* \* \* \* \* \* \* \* \* \* \* \* \* \* \* \* \* \* \* \* \* \* \* \* \* \* \*

))))

OL472059 CCU-CUACAACUAGAGUCCU-----C-UAUAGAUGCCCAUACUGUAUUGGU  
NC\_003546 CUG-CUCGCGGUGGAUGCUUCGUGCAAAGC-UAUGAUGCCUACGUA--UAUGGCGUA  
NC\_003835 CUGUCUCCGGGUGGAUGCCU--CAUGGUGC-UAUGGAUGC-----  
NC\_039076 CUA-CUCCGGGUGGAAGCCU-AUACAAAGC-UAUGGAUGCCUAUAUUUGAAAUAUAUA  
NC\_009536 CUA-CUCCGGGUGGAUGUU--UAAGUGUAUAUAGAUGCCUAUAUUUGAAAUAUAUA  
NC\_003810 CUG-CUCCGGGUGGAUGCU--AUACAUGC-UAUGGAUGCCUAUAUUUGAAAUAUAUA  
NC\_003570 CUG-CUCCGGGUGGAUGUUA--AUACCC--UAUGGAUGCCUAUAUUUGAAAUAUAUA  
NC\_011807 CUG-CUCCGGGUGGAUGUU--AUACCCGC-UAUGGAUGCCUAUAUUUGAAAUAUAUA  
\* \* \* \* \* \* \* \* \* \* \* \* \* \* \* \* \* \* \* \* \* \* \* \* \* \* \* \* \* \* \* \* \* \* \* \* \* \* \* \* \* \*

) (((((((((( )))))))) ) ) (((

OL472059 GAUGCCA-AAUCUCUCUCUU-GAGAGAGAUU-UGAUGCCUACCUUUGGUAGAGGCGAC  
NC\_003546 GAUGCCU-AUAUUUCUCUCCU-GAGAAAUAU-AGAUGCCUCC---AAAGGAGAUGC-  
NC\_003835 -----  
NC\_039076 GAUGCCUAAAUUUUCUCUCAUGGAGAAAAUUUAGAUGCCUCC---AAAGGAGAUGC-  
NC\_009536 GAUGCCCAA-ACUCUCUCUCAUGGAGAGAGAAU-GGAUGCCUCC---GAAGGAGAUGC-  
NC\_003810 GAUGCCUAAUACUCUCUCUCAGGGAGAGAGUUU-AGAUGCCUCC---AAAGGAGAUGC-  
NC\_003570 GAUGCCUAAUUCUCUCUCUCAGGGAGAGAGAUU-AGAUGCCUCC---AAAGGAGAUGC-  
NC\_011807 GAUGCCUAAUACUCUCUCUCAGGGAGAGAGUUU-AGAUGCCUCC---AAAGGAGAUGCU

## Supplementary Data C

Identification and annotation of putative readthrough (RT) domains in different ilarvirus clades. Iilarvirus clusters were defined by applying BLASTCLUST [8] to CP amino acid sequences with an 80% identity threshold, as described in Methods. Clusters are ordered by the number of component sequences, from most to fewest. Subsequently, clusters 8 and 17 were each split into two subclusters (8a, 8b, 17a, 17b) due to the presence of two NCBI RefSeqs in each of the initial clusters. Cluster 6 was split into two subclusters (6a, 6b) because sequences in this cluster appeared to divide into two groups – those with or without an insert in the RNA3 3'UTR. Cluster 5 was split into two subclusters because the single *Fragaria chiloensis* latent virus sequence (cluster 5a) contained a putative RT domain with a predicted zinc-finger motif, whereas the potato yellowing virus sequences (cluster 5b) had a shorter putative RT domain without a predicted zinc-finger motif. For each cluster or subcluster, the following pages present: (a) an intersegment alignment of the 3'UTR sequences of reference RNA 1, 2 and 3 sequences (where RNA1/RNA2 3'UTR sequences are available); and (b) for all available RNA3 sequences in the cluster with 3'UTR coverage (see Methods), the context of the CP stop codon, and the amino acid translation of the ORF in-frame with and immediately 3' of the CP stop codon whether or not readthrough is proposed to occur in that cluster.

Alignments of the RNA 1, 2 and 3 3'UTRs were performed with MUSCLE [7] with default parameters. Note that the 3'UTRs are often 3'-incomplete. Where the 3' truncation point differs between segments, this sometimes leads to poor quality/misleading alignments. In this study, the presence of a lengthy insert (or inserts) in RNA3 when the 3'-of-CP region was compared with the 3'UTRs of RNAs 1 and 2, was taken as a proxy for the putative presence of a RT domain in that cluster.

A few sequences in clusters proposed to encode a RT domain can be observed to have atypical (truncated or extended) RT ORFs. These may be due to sequencing errors or sequencing of defective viral genomes. Whereas insertion/deletion sequencing errors that occur in known coding ORFs are generally corrected before submission of sequences to NCBI, insertion/deletion errors that occur outside of known ORFs often escape notice (examples in Refs [9] and [10]).

Note that shortened RT peptides can result from early termination codons or from sequences with incomplete 3'UTR coverage. In the peptide sequences presented, an "\*" indicates a termination codon. Shorter-than-normal RT peptides that do not end in an "\*" are shortened because the RT ORF runs off the end of the available RNA3 nucleotide sequence.

**UNN** CP stop codon in RNA3

**UNN** Next in-frame stop codon in RNA3

## CLUSTER 1

### Alignment of 3'UTRs from the 3 segments of a representative genome

```
RNA3      UGA CUAGAUGGUCACCUCGGUGAGACCGAGAUGCCGCACAUAGAUGGUAUUCCUGUGUG
RNA1      U-----GUAACAUAUGUUUAUUGUACUCCU-----
RNA2      U-----GAUUUAG-----GUAUUUCCU-----
          *                               ***           *** *   ***

RNA3      CGAUGUGGAUUCACACCUCGACGUAUUGUAGAUAUACAUAUUGGAAGUGUGACAUCUGU
RNA1      -----CUAUAGA-----GAGUUGCCGCAGAUUU
RNA2      -----CUCUUAUAGA-----GAGAUGCCGCUU-----
          *   ****                               **  *   *

RNA3      UCCUAUGAACAGUAUGCAUAGCUGCCGCGCAUCCGGGCGUGAGACUAUGAUCCAUGUGAG
RNA1      UC--UGCGAAGU-UUCGGAACUGUAUUUUGCCGGUGGAUAGG-----
RNA2      -----UGCGAAGA-----UGUCAGUAGGUGGG-----
          **   **                               *   *   *   *

RNA3      CAUUCCGAAUCGGACGAUUCCAUGGGAAACCAUGAGACCUUUGGGUCGAUGCUUACGUU
RNA1      -----CGGGUGUAGUGCUUCU-----CCAACACACUCCA-----C
RNA2      -----CGAAACAUACGCUUCU-----UUAUGUUUUCUACUGAU-----
          **           *   **                   *           *

RNA3      UGGUGCCAGUAGUAUAUAAU-AUACUACUGAUGCCUCCUUUAUAGGAGAUGC
RNA1      UGAUGCUGUUUAUUAUCUAAUGAUUAACAACUAGCCUCCUUAAAGGAGAUGC
RNA2      --AUUCCAGUUUAUUAUCUAAUGAUUAACUGAUGCCUCC--AAAUGGAGAUGC
          * *   *   ***   ***   ***   *   *****   *   *****
```

RNA1 NC\_003844 172 nt  
RNA2 NC\_003842 142 nt  
RNA3 NC\_003845 291 nt

**Note:** Unlike for many ilarvirus genomes (see other clusters below), here the 3'UTRs are not so highly conserved between RNAs 1, 2 and 3 and so the insert of the RT region is less clear in the alignment. Nonetheless, the difference in length between the RNA3 and the RNA1 and RNA2 sequences shown ( $291 - 0.5 \times (172 + 142) = 134$  nt) is close to the length of the RT sequence (138 nt), consistent with Cluster 1 sequences encoding a RT domain in their RNA3s.

### All sequences in the cluster

104 Tobacco streak virus  
5 Sunflower necrosis virus (JF340380 JF340381 JF340382 JF340383 JF340384)

Accession number / CP stop and 3'-adjacent 6 nt / CP-frame translation of sequence from immediately after CP stop codon to next in-frame stop codon (\*), if present, or to end of available sequence

```
KP256520 UGA CUGAUG LMVTSARAEMPHIRGNSCVRCGFRPPRVVDQRVWGCNFCSEYEQYA*
MT893737 UGA CUAGAU LDGQPDDVELPYIDGNACVRCGYAPKYIVDQC VWSCTLCSYEQKA*
MT596820 UGA CUAGAU LDGHLGRTEMPHIRGNSCVRCGYTPPRIVDQYVWKC VVCSYEQHA*
MT596823 UGA CUAGAU LDGHLGRTEMPHIRGNSCVRCGYTPPRIVDQYVWKC VVCSYEQHA*
MT669379 UGA CUAGAU LDGHLGRTEMPHIRGNSCVRCGYTPPRIVDQYVWKC VVCSYEQHA*
FJ403377 UGA CUAGAU LDGHLGRTEMPRIRGNSCARCGYTPPRIVDQYVWKC VVCSYEQHA*
JX073658 UGA CUAGAU LDGHLGRTEMPRIRGNSCARCGYTPPRIVDQYVWKC VVCSYEQHA*
KT445969 UGA CUAGAU LDGHLGRTEMPRIRGNSCARCGYTPPRIVDQYVWKC VVCSYEQHA*
JX463339 UGA CUAGAU LDGHLGRTELPHIRRNSCVRCGFTPPRIVDQYVWSCNMCSYEQHA*
MH184523 UGA CUAGAU LDGHLGRTELPHIRRNSCVRCGFTPPRIVDQYVWSCNMCSYEQHA*
JX463349 UGA CUAGAU LDGHLGRTELPHIRRNSCVRCGFTPPRIVDQYVX
NC_003845 UGA CUAGAU LDGHLGETEMPHIDGNSCVRCGFTPPRIVDQYIWKCDICSYEYQA*
JX463347 UGA CUAGAU LDGHLGGTEMPHIDGNSCVRCGFTPPRIVDQYIWSCDVCSYEYQA*
KR017710 UGA CUAGAU LDGHLGETEMPHIDGNSCVRCGFTPRCIVDQYIWACDICSYEYQA*
MT602530 UGA CUAGAU LDGHLGRTEMPHIDGNTCVRCGFTPPRIVDQYVWKC NICSYEYQA*
MT669385 UGA CUAGAU LDGHLGRTEMPHIDGNTCVRCGFTPPRIVDQYVWKC NICSYEYQA*
MT602533 UGA CUAGAU LDGHLGRTEMPHIDGNTCVRCGFTPPRIVDQYVWKC NICSYEYQA*
MT602536 UGA CUAGAU LDGHLGRTEMPHIDGNTCVRCGFTPPRIVDQYVWKC NICSYEYQA*
MT602539 UGA CUAGAU LDGHLGRTEMPHIDGNTCVRCGFTPPRIVDQYVWKC NICSYEYQA*
```

MT602545 UGA CUAGAU LDGHLGRTEMPHIDGNTCVRCGFTPPRIVDQYVWKCNICSYEQYA\*  
MT602542 UGA CUAGAU LDGHLGRTEMPHIDGNTCVRCGFTPPRIVDQYVWKCNICSYEQYA\*  
MH299981 UGA CUAGAU LDGPPR\*  
KY547804 UGA CUAGAU LDGHLGRTELPYIRGNSCVRCGFTPPRIVDQYVWSCNFCSYEQHA\*  
KY176876 UGA CUAGAU LDGHLGRTELPYIRGNSCVRCGFTPPRIVDQYVWSCNFCSYEQHA\*  
MF555193 UGA CUAGAU LDGHLGRTESPYIRGNSSFRCGYTPPCS  
MH299986 UGA CUAGAU LDGHLGRTELPYIRGNSCVRCGFTPPRIVDQYVWSCSFCSYEQHA\*  
KX452727 UGA CUAGAU LDGHLGRTELPYIRGNSCVRCGFTPPRIVDQYVWSCNFCSYEQHA\*  
KX881767 UGA CUAGAU LDGHLGRTELPYIRGNSCVRCGFTPPRIVDQYVWSCNFCSYEQHA\*  
MF555190 UGA CUAGAU LDGHLGRTESPYIRGNPCLRCGVX  
MH299982 UGA CUAGAU LDGHLGRTELPYIRGNSCVRCGFTPPRIVDQYVWSCNFX  
JF340383 UGA CUAGAU LDGHLGRTELPYIRGNSCVRCGFTPPRIVDQYVWSCNFCSYEQHA\*  
JF340384 UGA CUAGAU LYGHLGRTELPYIRGNSCVRSFTPPRIVDQYVWSCNFCSYEQQA\*  
EF159704 UGA CUAGAU LDGHLGRTELPYIRGNSCVRCGFTPPRIVDRYVWSCNFCSYEQHA\*  
FJ561301 UGA CUAGAU LDGHLGRTELPYIRGNSCVRCGFTPPRIVDQYVWSCNFCSYEQHA\*  
MH299979 UGA CUAGAU LDGHLGRTELPYIRGNSCVRCGFTPPRIVDQYVWSCNFCSYERHA\*  
JF340381 UGA CUAGAU LDGHLGRTELPYIRGNSCVRCGFTPPRIVDQYVWSCYFCSYEQHA\*  
KF264469 UGA CUAGAU LDGHLGRTELPYIRGNSCVRCGFTPPRIVDQYVWSCNFCSYEQHA\*  
KY547795 UGA CUAGAU LDGHLGRTELPYIRGNSCVRCGFTPPRIVDQYVWSCNFCSYEQHA\*  
KY176873 UGA CUAGAU LDGHLGRTELPYIRGNSCVRCGFTPPRIVDQYVWSCNFCSYEQHA\*  
FJ655171 UGA CUAGAU LDGHLGRTELPYIRGNSCVRCGFTPPRIVDQYVWSCNFCSYEQHA\*  
DQ067449 UGA CUAGAU LDGHLGRTELPYIRGNSCVRCGFTPPRIVDQYVWSCNFCSYEQHA\*  
FJ608537 UGA CUAGAU LDGHLGRTELPYIRGNSCVRYGFTPPRIVDQYVWSCNFCSYEQHA\*  
JF340382 UGA CUAGAU LDGHLGRTELPYIRGNSCVRCGFTPPRIVEQYVWSYNFCSYEQYT\*  
MH299985 UGA CUAGAU LDGHLGRTELPYIRGNSCVRCGFTPPRIVDQYVWSCNFCSYERHA\*  
MH299980 UGA CUAGAU LDGHLGRTELPYIRGNSCVRCGFTPPX  
KX523132 UGA CUAGAU LDGHLGRTELPYIRGNSCVRCGFTPPRIVDQYVWSCNFCSYEQHA\*  
KM504248 UGA CUAGAU LDGHLGRTELPYIRGNSCVRCGFTPPRIVDQYVWSCNFCSYEQHA\*  
KU509214 UGA CUAGAU LDGHLGRTELPYIRGNSCVRCGFTPPRIVDQYVWSCNFCSYEQHA\*  
KX394691 UGA CUAGAU LDGHLGRTELPYIRGNSCVRCGFTPPRIVDQYVWSCNFCSYEQHA\*  
KU242583 UGA CUAGAU LDGHLGRTELPYIRGNSCVRCGFTPPRIVDQYVWSCNFCSYEQHA\*  
KU496882 UGA CUAGAU LDGHLGRTELPYIRGNSCVRCGFTPPRIVDQYVWSCNFCSYERHA\*  
KX405022 UGA CUAGAU LDGHLGRTELPYIRGNSCVRCGFTPPRIVDQYVWSCNFCSYERHA\*  
KX838948 UGA CUAGAU LDGHLGRTELPYIRGNSCVRCGFTPPRIVDQYVWSCNFCSYEQHA\*  
MG523398 UGA CUAGAU LDGHLGRTELPYIRGNSCVRCGFTPPRIVDQYVWSCNFCSYEQHA\*  
MG523400 UGA CUAGAU LDGHLGRTELPYIRGNSCVRCGFTPPRIVDQYVWSCNFCSYEQHA\*  
MH299983 UGA CUAGAU LDGHLGRTELPYI\*  
MH299984 UGA CUAGAU LDGHLGRTELPYIIGYSCVRCGFTPPRIGNQYVW  
MH299978 UGA CUAGAU LDGHLGRTELPYIRGNSCVRCGFTPPRIVD  
FJ655173 UGA CUAGAU LDGHLGRTELPYIRGNSCVRCGFTPPRIVDQYVWSCNFCSYEQHA\*  
MH744487 UGA CUAGAU LDGHLGRTELPYIRGNSCVRCGFTPPRIVDQYVWSCNFCSYEQHA\*  
JF340380 UAA CUAGAU LDGHLGRTELPYIRGNSCV\*  
AY501478 UGA CUAGAU LDGHLGRTELPYIRGNSCVRCGFTPPRIVDQYVWSCNFCSYEQHA\*  
AY501477 UGA CUAGAU LDGHLGRTELPYIRGNSCVRCGFTPPRIVDQYVWSCNFCSYEQHA\*  
AY501483 UGA CUAGAU LDGHLGRTELPYIRGNSCVRCGFTPPRIVDQYVWSCNFCSYEQHA\*  
AY501484 UGA CUAGAU LDGHLGRTELPYIRGNSCVRCGFTPPRIVDQYVWSCNFCSYEQHA\*  
EF159703 UGA CUAGAU LDGHLGRTELPYIRGNSCVRCGFTPPRIVDQYVWSCNFCSYEQHA\*  
KU242587 UGA CUAGAU LDGHLGRTELPYIRGNSCVRCGFTPPRIVDQYVWSCNFCSYEQHA\*  
KU496881 UGA CUAGAU LDGHLGRTELPYIRGNSCVRCGFTPPRIVDQYVWSCNFCSYEQHA\*  
KX394690 UGA CUAGAU LDGHLGRTELPYIRGNSCVRCGFTPPRIVDQYVWSCNFCSYEQHA\*  
KX838947 UGA CUAGAU LDGHLGRTELPYIRGNSCVRCGFTPPRIVDQYVWSCNFCSYEQHA\*  
MG523397 UGA CUAGAU LDGHLGRTELPYIRGNSCVRCGFTPPRIVDQYVWSCNFCSYEQHA\*  
KY547793 UGA CUAGAU LDGHLGRTELPYIRGNSCVRCGFTPPRIVDQYVWSCNFCSYEQHA\*  
KY547794 UGA CUAGAU LDGHLGRTELPYIRGNSCVRCGFTPPRIVDQYVWSCNFCSYEQHA\*  
MN631093 UGA CUAGAU LDGHLGRTELPYIRGNSCVRCGFTPPRIVDQYVWSCNFCSYEQHA\*  
KU378234 UGA CUAGAU LDGHLGRTELPYIRGNSCVRCGFTPPRIVDQYVWSCNFCSYEQHA\*  
KX523133 UGA CUAGAU LDGHLGRTELPYIRGNSCVRCGFTPPRIVDQYVWV\*  
MN631094 UGA CUAGAU LDGHLGRTELPYIRGNSCVRCGFTPPRIVDQYVWSCNFCSYEQHA\*  
FJ655169 UGA CUAGAU LDGHLGRTELPYIRGNSCVRCGFTPPRIVDQYVWSCNFCSYEQHA\*  
KF264468 UGA CUAGAU LDGHLGRTELPYIRGNSCVRCGFTPPRIVDQYVWSCNFCSYEQHA\*  
FJ561304 UGA CUAGAU LDGHLGRTELPYIRGNSCVRCGFTPPRIVDQYVWSCNFCSYEQHA\*  
FJ655172 UGA CUAGAU LDGHLGRTELPYIRGNSCVRCGFTPPRIVDQYVWSCNLCSEYEQHA\*  
FJ417082 UGA CUAGAU LDGHLGRTELPYIRGNSCVRCGFTPPRIVDQYVWSCNFCSYEQHA\*  
FJ417083 UGA CUAGAU LDGHLGRTELPYIRGNSCVRCGFTPPRIVDQYVWSCNFCSYEQHA\*  
AY501476 UGA CUAGAU LDGHLGRTELPYIRGNSCVRCGFTPPRIVDQYVWSCNFCSYEQHA\*  
AY501480 UGA CUAGAU LDGHLGRTELPYIRGNSCVRCGFTPPRIVDQYVWSCNFCSYEQHA\*  
AY501482 UGA CUAGAU LDGHLGRTELPYIRGNSCVRCGFTPPRIVDQYVWSCNFCSYEQHA\*  
EF159702 UGA CUAGAU LDGHLGRTELPYIRGNSCVRCGFTPPRIVDQYVWSCNFCSYEQHA\*  
FJ655170 UGA CUAGAU LDGHLGRTELPYIRGNSCVRCGFTPPRIVDQYVWSCNFCSYEQHA\*  
KF264467 UGA CUAGAU LDGHLGRTELPYIRGNSCVRCGFTPPRIVDQYVWSCNFCSYEQHA\*  
KF264470 UGA CUAGAU LDGHLGRTELPYIRGNSCVRCGFTPPRIVDQYVWSCNFCSYEQHA\*



KU242582 UGA CUAGAU LDGHLGRTELPYIRGNCVRCGFTPPRIVDQYVWSCNFCSSYEQHA\*  
KU242584 UGA CUAGAU LDGHLGRTELPYIRGNSCVRCGFTPPRIVDQYVWSCNFCSSYEQHA\*  
KU242585 UGA CUAGAU LDGHLGRTELPYIRGNSCVRCGFTPPRIVDQYVWSCNFCSSYEQHA\*  
KU242586 UGA CUAGAU LDGHLGRTKLPYIISYSRVRCEFTPPHKYIEKRQDMVKYNTLVQHYIQYSHILCKIYSKNVYKIIVX  
KX778723 UGA CUAGAU LDGHLGRTELPYIRGNSCVRCGFTPPRIVDQYVWSCNFCSSYEQHA\*  
KY132090 UGA CUAGAU LDGHLGRTELPYIRGNSCVRCGFTPPRIVDQYVWSCNFCSSYEQHA\*  
KY176870 UGA CUAGAU LDGHLGRTELPYIRGNSCVRCGFTPPRIVDQYVWSCNFCSSYEQHA\*  
KY547796 UGA CUAGAU LDGHLGRTELPYIRGNSCVRCGFTPPRIVDQYVWSCNFCSSYEQHA\*  
KY547805 UGA CUAGAU LDGHLGRTELPYIRGNSCVRCGFTPPRIVDQYVWSCNFCSSYEQHA\*  
MG523399 UGA CUAGAU LDGHLGRTELPYIRGNSCVRCGFTPPRIVDQYVWSCNFCSSYEQHA\*  
MH299987 UGA CUAGAU LDGHLGRTELPYIRGNSCVRCGFTPPIRLVV\*  
MT682308 UGA CUAGAU LDGHLGRTELPYIRGNSCVRCGFTPPRIVDQYVWSCNFCSSYEQHA\*  
KY547799 UGA CUAGAU LDGHLGRTELPYIRGNSCVRCGFTPPRX  
KJ825822 UGA CUAGAU LDGHLGRTELPYIRGNSCVRCGFTPPRIVDQYVWSCNFCSSYEQHA\*  
GQ370526 UGA CUAUCU LSSHLGNTEMPYINGNSCVRCGFTPPRIVDQYVWDCTFCSYEQRA\*  
MK732934 UGA CUAUUA LLSHPDDVGLPHIHGNSCVRCGFAPRHVVDQRVWDCTFCSYEQYA\*  
AY354406 UGA CUAUCU LSSHLGDTELPHINGNTCVRCGFTPPRVVDQHVWDCTFCSYEQYA\*  
JX463336 UGA CUAUCU LSSHLGDTELPHINGNTCVRCGFTPPRVVDQHVWDCTFCSYEQYA\*  
MT360269 UGA CUAUCU LSSHLGDTELPHINGNTCVRCGFTPPRVVDQHVWDCTFCSYEQYA\*

## CLUSTER 2

### Alignment of 3'UTRs from the 3 segments of a representative genome

```
RNA2      UAGAACGAGUUGAACGCGUUCGAAUUUCCUCGAAUAGAGAAGAAUCGUACCACCG - - UGU
RNA3      UAGAGUGAGAUAAAGCACACUCGAAUUUCUCCGA - - AUGGAAAGUUCGCACCACCGAUAGU
RNA1      UAGAGUGAGAUAAAGCACACUCG - - UUCCAGAUUAUGGAAGAACCGUACCACCG - - UGU
          **** * * * * * * * * * * * * * * * * * * * * * * * * * * * * * *
          * * * * * * * * * * * * * * * * * * * * * * * * * * * * * *

RNA2      GGGU - UUGC - GAUUAGUUCUAGAGAGUUGCUUCCGGCUCUCGAGUUCAUAGGUACUJAC
RNA3      GGAUUAUUGCGAAAUAGAUUUUCUGAAAGUCGCUUCCCGCUCUUGCAUGCUUGGAAUUCUJAC
RNA1      GGAU - UUAUCGGUUAUCUCUUUUGAAGUUGUUUCCUJACUUCAGUGUUCUGAGAGAUJAC
          ** * * * * * * * * * * * * * * * * * * * * * * * * * * * * * *

RNA2      CUGCUIUJ - GCAGAUGCCUACGACGUGAAGUCGUGAUGCCCCGAUAGGGAAGC
RNA3      CUGCUIUJAGCAGAUGCCACAACGUGAAGUUGUGGAUGCCCCGUJAGGGAAGC
RNA1      CUGCUIUJAGCAGAUGCCUACAACGAGAAGUUGUGAUGCCCCGUJAGGGAAGC
          **** * * * * * * * * * * * * * * * * * * * * * * * * * * * * * *
```

RNA1 NC\_004362 168 nt  
RNA2 NC\_004363 168 nt  
RNA3 NC\_004364 171 nt

**Note:** No insert in RNA3, so no evidence for RT domain.

### All sequences in the cluster

101 Prunus necrotic ringspot virus  
1 Apple mosaic virus (U03857\*)

\* tblastn analysis indicates this is a mislabelled prunus necrotic ringspot virus sequence: 100% coverage x 96% a.a. identity to closest prunus necrotic ringspot virus sequence, but 100% coverage x 51% a.a. identity to closest apple mosaic virus sequence

Accession number / CP stop and 3'-adjacent 6 nt / CP-frame translation of sequence from immediately after CP stop codon to next in-frame stop codon (\*), if present, or to end of available sequence

```
MZ451050 UAG GGCGAG GEISTPEFPP*
MZ451054 UAG GGCGAG GEISAPEFPP*
MZ451055 UAG GGCGAG GEISAPEFPP*
L38823 UAG AGUGAG SEISTLEFLR*
AJ133207 UAG AGUGAG SEISTLEFLR*
AJ133210 UAG AGUGAG SEISTLEFLR*
FJ546090 UAG AGUGAG SEISTLEILR*
FJ546091 UAG AGUGAG SEISTLEILR*
AJ133203 UAG AGUGAG SEISTLEFSPNGKFAPPVVDIAN*
U03857 UAG AGUGAG SEISTLEFLRMESHHHR*
AJ133201 UAG AGUGAG SEISTLEFLRMESHHHR*
JQ005047 UAG AGUGAG SEISTLEFSPNGKFAPPVVDIAN*
AJ133209 UAG AGUGAG SEISTLEFSPNGKFAPPLVDIAN*
AJ133202 UAG AGUGAG SEISTLEFSPNGKFAPPVVDIAN*
KY883322 UAG AGUGAG SEISTLEFSPNGKFAPPVVDIAN*
AJ133204 UAG AGUGAG SEISTLEFSPNGKFAPPVVDIAN*
AJ133199 UAG AGUGAG SEISTLEFSPNGKFAPPVVDIAN*
MF069046 UAG AGUGAG SEISTLEFSPNGKFAPPVVDIAN*
KY883335 UAG AGUGAG SEISTLEIFSEWKVRTTDSGYCELD*
S78312 UAG AGUGAG SEISTLEFSPNGKFAPPVVDIAN*
AJ133212 UAG AGUGAG SEISTLEFSPNGKFAPPVVDIAN*
MZ451049 UAG AGUGAG SEISTLDFSPNGKFAPPVVDIAN*
MZ451048 UAG AGUGAG SEISTLDFSPNGKFAPPVVDIAN*
AF013286 UAG AGUGAG SEISTLEFLQMESSHTRISP
AJ133208 UAG AGUGAG SEISTLEFSPNGKFAPPVVDIAN*
JQ005040 UAG AGUGAG SEISTLEFSPNGKFAPPVVDIAN*
JQ005031 UAG AGUGAG SEISTLEFSPNGKFAPPVVDIAN*
AJ133200 UAG AGUGAG SEISTLEFSPNGKFAPPVVDIAN*
JQ005039 UAG AGUGAG SEISTLEFSPNGKFAPPVVDIAN*
```



JQ005046 UAG AGUGAG SEISTLEFSPNGKFAPPVIDIAN\*  
JQ005050 UAG AGUGAG SEISTLEFSPNGKFAPPVIDIAN\*  
JQ005052 UAG AGUGAG SEISTLEFSPNGKFAPPVIDIAN\*  
JQ005053 UAG AGUGAG SEISTLEFSPNGKFAPPVIDIAN\*  
JQ005054 UAG AGUGAG SEISTLEFSPNGKFAPPVIDIAN\*  
JQ005055 UAG AGUGAG SEISTLEFSPNGKFAPPVIDIAN\*  
JQ005056 UAG AGUGAG SEISTLEFSPNGKFAPPVIDIAN\*  
JQ005057 UAG AGUGAG SEISTLEFSPNGKFAPPVIDIAN\*  
JQ005058 UAG AGUGAG SEISTLEFSPNGKFAPPVIDIAN\*  
MZ451047 UAG AGUGAG SEISTLEFSPNGKFAPPVIDIAN\*  
MZ451060 UAG AGUGAG SEISTLEFSPNGKFAPPVIDIAN\*  
MZ451061 UAG AGUGAG SEISTLEFSPNGKFAPPVIDIAN\*  
MZ451062 UAG AGUGAG SEISTLEFSPNGKFAPPVIDIAN\*  
MZ451063 UAG AGUGAG SEISTLEFSPNGKFAPPVIDIAN\*  
AJ133205 UAG AGUGAG SEISTLEFSPNGKFAPPVIDIAN\*  
JN416773 UAG AGUGAG SEISTLEFSPNGKFAPPVIDIAN\*  
JQ005030 UAG AGUGAG SEISTLEFSPNGKFAPPVIDIAN\*  
JQ005032 UAG AGUGAG SEISTLEFSPNGKFAPPVIDIAN\*  
JQ005033 UAG AGUGAG SEISTLEFSPNGKFAPPVIDIAN\*  
JQ005034 UAG AGUGAG SEISTLEFSPNGKFAPPVIDIAN\*  
JQ005035 UAG AGUGAG SEISTLEFSPNGKFAPPVIDIAN\*  
JQ005036 UAG AGUGAG SEISTLEFSPNGKFAPPVIDIAN\*  
JQ005037 UAG AGUGAG SEISTLEFSPNGKFAPPVIDIAN\*  
JQ005038 UAG AGUGAG SEISTLEFSPNGKFAPPVIDIAN\*  
JQ005041 UAG AGUGAG SEISTLEFSPNGKFAPPVIDIAN\*  
JQ005042 UAG AGUGAG SEISTLEFSPNGKFAPPVIDIAN\*  
JQ005043 UAG AGUGAG SEISTLEFPPNGKFAPPVIDIAN\*  
JQ005044 UAG AGUGAG SEISTLEFSPNGKFAPPVIDIAN\*  
JQ005045 UAG AGUGAG SEISTLEFSPNGKFAPPVIDIAN\*  
KU977374 UAG AGUGAG SEISTLEFSPNGKFAPPVIDIAN\*  
KU977375 UAG AGUGAG SEISTLEFSPNGKFAPPVIDIAN\*  
KU977376 UAG AGUGAG SEISTLEFSPNGKFAPPVIDIAN\*  
KU977377 UAG AGUGAG SEISTLEFSPNGKFAPPVIDIAN\*  
KU977378 UAG AGUGAG SEISTLEFSPNGKFAPPVIDIAN\*  
KY883325 UAG AGUGAG SEISTLEFSPNGKFAPPVIDIAN\*  
MF198443 UAG AGUGAG SEISTLEFSPNGKFAPPVIDIAN\*  
MH730938 UAG AGUGAG SEISTLEFSPNGKFAPPVIDIAN\*  
MH730939 UAG AGUGAG SEISTLEFSPNGKFAPPVIDIAN\*  
ON304061 UAG AGUGAG SEISTLEFSPNGKFAPPVIDIAN\*  
MZ451052 UAG AGUGAG SEISTLEVSPNGKFAPPVIDIAN\*  
MZ451056 UAG AGUGAG SEISTLEFLRMESHHHR\*  
AJ133213 UAG AGUGAG SEISTLEFLRMESHHHR\*  
KT444703 UAG AGUGAG SEISTLEFLRMESHHHR\*  
Y07568 UAG AGUGAG SEISTLEFLRMESHHHR\*  
MF069040 UAG AGUGAG SEISTLEFLRMESHHHR\*  
MZ451051 UAG AGUGAG SEISTLEFLRMESHHHR\*  
MZ451057 UAG AGUGAG SEISTLEFLRMESHHHR\*  
AJ133206 UAG AGUGAG SEISTLEFLRMESYHR\*  
LC382468 UAG AGUGAG SEISTLEFLRMESYHR\*  
MZ451059 UAG AGUGAG SEISTLEVSPNGKFAPPVIDIAN\*  
AJ133211 UAG AGUGAG SEISTLEFLRMESHHHR\*  
AM408910 UAG CCCGGG PGGNH\*  
AF013287 UAG AGUGAG SEISTLEFLRMESHTRISP  
MZ451053 UAG AGUGAG SEISTLEFSPNGKFAPPLVDIAN\*  
KX650619 UAG AGUGAG SEISTLEFLRMESHHHR\*  
MH730940 UAG AGUGAG SEISTLEFLRMESHHHR\*  
MH730941 UAG AGUGAG SEISTLEFLRMESHHHR\*  
MH730942 UAG AGUGAG SEISTLEFLRMESHHHR\*  
FJ546092 UAG AGUGAG SEISTLEFLRMESHHHR\*  
MN656197 UAG AGUGAG SEISTLEFLRMESHHHR\*  
JQ005048 UAG AGUGAG SEISTLEFLRMESHHHR\*  
JQ005051 UAG AGUGAG SEISTLEFLRMESHHHR\*  
JQ005049 UAG AGUGAG SEISTLEFLRMESHHHR\*  
MZ451065 UAG AGUGAG SEISTLEFLRMESHHHR\*  
AJ969095 UAG AGUGAG SEISTLEFLRMESHTRISP  
MZ451058 UAG AGUGAG SEISTLEFLRMESHHHR\*  
MZ451064 UAG AGUGAG SEISTLEFLRMESHHHR\*  
NC\_004364 UAG AGUGAG SEISTLEFLRMESHHHR\*  
FJ610344 UAG AGUGAG SEISTLEFFSEWKVRTTDSGYCELDF\*  
JN416776 UAG AGUGAG SEISTLEFLRMESYHR\*  
MN656194 UAG AGUGAG SEISTLEFLRMESHHHR\*

AY948440 UAG AGUGAG SEISTLEFLRMESSHR\*  
AY948441 UAG AGUGAG SEISTLEFLRMESSHR\*

### CLUSTER 3

#### Alignment of 3'UTRs from the 3 segments of a representative genome

```
RNA1      UG-----
RNA2      UGACCAUACUAUCUAUUUUGU-----
RNA3      UGA CUAUAUGAUCCAUCUAUUUGAUUGGCUUCCACUAUGAGUAUUCUAGGAAUUAUCGU
          **

RNA1      -----ACCGUUCAGAUUUUGUCACUGGACGUAAA
RNA2      -----UAGAAUCCACCAUUCAGAUUUUGUCACUGAAUGU--C
RNA3      AGUUGGAAAUGCUGCUUUUGCAACAGAAUCCACCAUUCAGAGUUUGUCACUGAAUGU-UA
          *** ***** ***** **

RNA1      AAUCCUUUUGGUUAACUCGUCACUGCGUACUUUUUGAGUUAAGAUAAAAUGCCCAUUGUA
RNA2      AAUCCUUUUGGUUAACUCGUCACUAAGUGCGUAAAAGGUUAAGAUAAAAUGCCCAUUGUA
RNA3      AAUCCUUUUGGUUAACUCGUCACUAAGUGCGUAAAAGGUUAAGAUAAAAUGCCCAUUGUA
          ***** * ** * * * *****

RNA1      UCCUGAAUGGAUGACACUUUUUAUUGCCUACAAA-UUUGUAGAUGCCUCACCGUAAGGU
RNA2      UCCUGAAUGGAUGACACUUUUUAUUGCCUACAGA-UUUGUAGAUGCCUCACCGUAAGGU
RNA3      UCCUGAAUGGAUGACACUUUUUAUUGCCUACAAAUUUUGUACAUGCCUCACCGUAAGGU
          ***** ***** * *****

RNA1      GAGGAUGCCCUU--AAGGAUGC
RNA2      GAGGAUGCCCUUUAAGGAUGC
RNA3      GAGGAUGCCCUUUAAGGAUGC
          ***** * *****
```

```
RNA1 NC_008039 171 nt
RNA2 NC_008037 198 nt
RNA3 NC_008038 262 nt
```

#### All sequences in the cluster

39 Prune dwarf virus

Accession number / CP stop and 3'-adjacent 6 nt / CP-frame translation of sequence from immediately after CP stop codon to next in-frame stop codon (\*), if present, or to end of available sequence

```
KU215404 UGA CUACAU LHDPSFDCTSTMSIPKNIRSWKCCFCNRIHHSDFVTEC*
MF078480 UGA CUAUUAU LYDPSFDCTSTMSIPRNIRSWKCCFCNRIHHSDFVTEC*
MZ221000 UGA CUAUUAU LYDPLFDCTSTMSIPRNIRSWRCCFCNRIHHSDFVTEC*
MK560342 UGA CUAUUAU LYDPLFDCTSTMSIPRNIRSWRCCFCNRIHHSDFVTEC*
MZ221002 UGA CUAUUAU LYDPLFDCTSTMSIPRNIRSWRCCFCNRIHHSDFVTEC*
MZ221003 UGA CUAUUAU LYDPLFDCTSTMSIPRNIRSWRCCFCNRIHHSDFVTEC*
MZ220997 UGA CUAUUAU LYDPLFDCTSTMSIPRNIRSWRCCFCNRIHHSDFVTEC*
KY883330 UGA CUAUUAU LYDPSFDCASTMSIPRNIRSWKCCFCNGIHHSDFVTEC*
MK834276 UGA CUAUUAU LYDPLFDCTSTMSIPRNIRSWRCCFCNRIHHSDFVTEC*
MZ221009 UGA CUAUUAU LYDPSFDCASTMSIPRNIRSWKCCFCNGIHHSDFVTE*
MZ220992 UGA CUAUUAU LYDPSFDCTSTMSIPRNIRSWKCCFCNGIHHSDFVTEC*
KY883331 UGA CUAUUAU LYDLSFDCASTMSIPRNIRSWKCCFCNRIHHSEFVTEC*
MK392156 UGA CUAUUAU LYDPLFDCTSTMSVPRNIRSWKCCFLN
MZ221005 UGA CUAUUAU LYDPSFDCASTMSIPRNIRSWKCCFCNGIHHSDFVTEC*
MZ221010 UGA CUAUUAU LYDPSFDCASTMSIPRNIRSWKCCFCNGIHHSDFVTEC*
MZ220998 UGA CUAUUAU LYDSSFDCASTMSIPRNIRSWKCCFCNGIHHSDFVTE*
KU215407 UGA CUAUUAU LYDPSFDCASTMSIPRNIRSWKCCFCNRIHHSEFVTE*
MK369931 UGA CUAUUAU LYDPSFDCASTMSIPRNIRSWKCCFCNRIHHSEFVTE*
MZ220994 UGA CUAUUAU LYDSSFDCASTMSIPRNIRSWKCCFCNGIHHSDFVTE*
MZ221012 UGA CUAUUAU LYDPSFDCASTMSIPRNIRSWKCCFCNRIHHSEFVTEC*
MT013235 UGA CUAUUAU LYDLSFDCASTMSIPRNIRSWKCCFSNRIHHSEFVTEC*
MZ221014 UGA CUAUUAU LYDPSFDCASTMSIPKNIRSWKCCFCNRIHHSEFVTEC*
MZ221008 UGA CUAUUAU LYDPSFDCASTMSIPKNIRSWKCCFCNRIHHSEFVTEC*
MZ221006 UGA CUAUUAU LYDPSFDCASTMSIPKNIRSWKCCFCNRIHHSEFVTEC*
MZ221007 UGA CUAUUAU LYDPSFDCASTMSIPKNIRSWKCCFCNRIHHSEFVTEC*
MW334945 UGA CUAUUAU LYDPSFDCASTMSIPKNIRSWKCCFCNRIHHSEFVTEC*
```

MZ220993 UGA CUAUUAU LYDPSFDCASTMSIPKNIRSWKCCFCNRIHHSEFVTEC\*  
MZ220999 UGA CUAUUAU LYDPSFDCTSTMSIPRNIRSWKCCFCNRIHHSEFVTEC\*  
MZ221001 UGA CUAUUAU LYDPSFDCTSTMSIPRNIRSWKCCFCNRIHHSEFVTEC\*  
MZ221013 UGA CUAUUAU LYDPSFDCTSTMSIPRNIRSWKCCFCNRIHHSEFVTEC\*  
MZ291946 UGA CUAUUAU LYDPSFDCTSTMSIPRNIRSWKCCFCNRIHHSEFVTEC\*  
MZ291949 UGA CUAUUAU LYDPSFDCTSTMSIPRNIRSWKCCFCNRIHHSEFVTEC\*  
NC\_008038 UGA CUAUUAU LYDPSFDCASTMSIPRNIRSWKCCFCNRIHHSEFVTEC\*  
MZ291943 UGA CUAUUAU LYDPSFVCASTMSIPRNIRSWKCCFCNRIHHSEFVTEC\*  
MZ221004 UGA CUAUUAU LYDPSFDCASTMSIPRNIRSWKCCFCNRIHHSEFVTEC\*  
MK392155 UGA CUAUUAU LYDPSFDCASTMSIPKNIRSWKCCFLDX  
MZ220996 UGA CUAUUAU LYDPSFDCASTMSIPRNIRSWKCCFCNRIHHSEFVTEC\*  
MZ220995 UGA CUAUUAU LYDPSFDCTSTMSIPKNIRSWKCCFCNGIHHSDFFVTEC\*  
MZ221011 UGA CUAUUAU LYDPSFDCASTMSIPKNIRSWKCCFCNGIHHSDFFVTEC\*

## CLUSTER 4

### Alignment of 3'UTRs from the 3 segments of a representative genome

```
RNA3      UGACUGGUUAAUUACCUCGAAGAAACUUCGAGGUGCCUCACAUUUUACCGACUAUUGUU
RNA1      UGAUUG--UCAUUUUUU-----GACAUUUUUU
RNA2      -----

RNA3      GGUUCAUGUGUGAGAUCCGGAUCCGCCACGGAGAGUGCCAGACGCACGCUAUUUGUGG
RNA1      UAUUCCAGUUUACUGGAUGCCGUCGUUGACGAUGAUUUUAUUAUAC-----UAG
RNA2      -----UAA
                                                *

RNA3      UGUGGCAUGUGCAAUAUUUGCACUAUGCAUAGUUACCUCGCAUCCGGGUUAAAUCUUAU
RNA1      GUUGGCAUU-----UUGAGCGCAUCUUACUCAAAUCCUAGU-----
RNA2      CAUGGCAG-----CUGAGCGCAUCUAUCUCAGCGGUUAAU-----
                ****                *  *  *  *  *  *                *

RNA3      GAAUUUCGCUAGAACAUCCGAAUCCGACGAUUUCCACCGUAAAAGGUGAGACCUUUGGG
RNA1      -----AUUCCA-----
RNA2      -----GGUUGCUA-----
                *  *  *

RNA3      UCGAUGUUCUAAUGGUUCCGUUAAUAUAUUGAUUAUUUACGAUGCCUCC-AAUUAAGA
RNA1      UUAUAU-UCUAAUGA-----UUAUUAUGAUGCCUCUUAUAUAAGA
RNA2      UUAUAU-UCUAAUGA-----UUAUUAUUAUGCCUCCAAAUU--GGA
                *  *  *  *  *  *  *  *  *  *  *  *  *  *  *  *  *  *

RNA3      GAUGC
RNA1      GAUGC
RNA2      GAUGC
                ****
```

RNA1 NC\_011553 163 nt  
RNA2 NC\_011554 89 nt  
RNA3 NC\_011555 304 nt

### All sequences in the cluster

38 Blackberry chlorotic ringspot virus

Accession number / CP stop and 3'-adjacent 6 nt / CP-frame translation of sequence from immediately after CP stop codon to next in-frame stop codon (\*), if present, or to end of available sequence

```
NC_011555 UGA CUGGUU LVNYLEENFEVPHILPTIVGSCVRCGFRPRRVPDARYLWCGMCKYLHYA*
JX429894 UGA CUGGUG LVNYLEGDFEMPHDLPEIAGSCVRCGFRPRRVPNALYWWCDMCNYLHYA*
JX429865 UGA CUGGUG LVNYLEGDFEMPHDLPEIAGSCVRCGFRPRRVPNALYWWCDMCNYLHYA*
JX429891 UGA CAGGUG QVKYLEGDFEMPHDLPEIAGSCVRCGFRPRRVPDALYWWCDMCNYLHYA*
JX429881 UGA CAGGUG QVKYLEDNFEMPHDLPEIAGSCVRCGFRPRRVPDALYWWCDMCNYLHYA*
JX429883 UGA CAGGUG QVKYLEDNFEMPHDLPEIAGSCVRCGFRPRRVPDALYWWCDMCNYLHYA*
JX429888 UGA CUGGUG LVNHLEGNFEMPHDLPEVAGSCVRCGFRPRRVPDALYWWCDMCNYLHYA*
OK338426 UGA CUGGUG LVNLEGDFEMPHNLPEIAGSCVRCGFRPRRVPDALYWWCDMCNYLHYA*
KX834012 UGA CUGGUG LVNYLEGDFEMPHNLPEIAGSCVRCGFRPRRVPDALYWWCDMCNYLHYA*
ON557618 UGA CUGGUG LVNYLEGDFEMPHNLPEIAGSCVRCGFRPRRVPDALYWWCDMCNYLHYA*
LC592046 UGA CUGGUG LVNYLEGDFEMPHNLPEIAGSCVRCGFRPRRVPDALYWWCDMCNYLHYX
JX429889 UGA CUGGUG LVNHLEGNFEMPHDLPEVAGSCVRCGFRPRRVPDALYWWCDMCNYLHYA*
JX429864 UGA CUGGUG LVNHLEGNFEMPHDLPEVAGSCVRCGFRPRRVPDALYWWCDMCNYLHYA*
JX429869 UGA CUGGUG LVNHLEGNFEMPHDLPEVAGSCVRCGFRPRRVPDALYWWCDMCNYLHYA*
JX429885 UGA CUGGUG LVNYLEGDFEMPHDLPEVAGSCVRCGFRPRRVPDALYWWCDMCNYLHYA*
JX429874 UGA CUGGUG LVNRLLEGNFEMPHDLPEVAGSCVRCGFRPRRVPDALYWWCDMCNYLHYA*
JX429872 UGA CUGGUG LVNHLESNFEMPHDLPEVAGSCVRCGFRPRRVPDALYWWCDMCNYLHYA*
JX429871 UGA CUGGUG LVNHLEGNFEMPHDLPEVAGSCVRCGFRPRRVPDALYWWCDMCNYLHYA*
JX429879 UGA CUGGUG LVNHLEGNFEMPHDLPEVAGSCVRCGFRPRRVPDALYWWCDMCNYLHYA*
JX429877 UGA CUGGUG LVNHLEGNFEMPHDLPEAAGSCVRCGFRPRRVPDALYWWCDMCNYLHYA*
JX429882 UGA CUGGUG LVNHLEGNFEMPHDLPEVAGSCVRCGFRPRRVPDALYWWCDMCNYLHYA*
```

JX429884 UGA CUGGUG LVNHLEGNFEMPHDLPEVAGSCVRCGFRPRRVPDALYWWCDMCNYLHYA\*  
JX429895 UGA CUGGUG LVNHLEGNFEMPHDLPEVAGSCVRCGFRPRRVPDALYWRCDMCNYLHYA\*  
JX429873 UGA CUGGUG LVNHLEGNFEMPHDLPEVAGSCVRCGFRPRRVPDALYWWCDMCNYLHYA\*  
JX429868 UGA CUGGUG LVNHLEGNFEMPHDLPEVAGSCVRCGFRPRRVPDALYWWCDMCNYLHYA\*  
JX429870 UGA CUGGUG LVNHLEGNFEMPHDLPEVAGSCVRCGFRPRRVPDALYWWCDMCNYLHYA\*  
JX429878 UGA CUGGUG LVNHLEGNFEMPHDLPEVAGSCVRCGFRPRRVPDALYWGCDMCNYLHYA\*  
JX429887 UGA CUGGUG LVNHLEGNFEMPHDLPEVAGSCVRCGFRPRRVPDALYWWCDMCNYLHYA\*  
GQ325716 UGA CUGGUG LVNHLEGNFEMPHDLPEVAGSCVRCGFRPRRVPX  
JX429866 UGA CUGGUG LVNHLEGNFEMPHDLPEVAGSCVRCGFRPRRVPDALYWGCDMCNYLHYA\*  
JX429867 UGA CUGGUG LVNHLEGNFEMPHDLPEVAGSCVRCGFRPRRVPDALYWWCDMCNYLHYA\*  
JX429875 UGA CUGGUG LVNHLEGNFEMPHDLPEVAGSCVRCGFRPRRVPDALYWWCDMCNYLHYA\*  
JX429876 UGA CUGGUG LVNHLEGNFEMPHDLPEVAGSCVRCGFRPRRVPDALYWWCDMCNYLHYA\*  
JX429890 UGA CUGGUG LVNHLEGNFEMPHDLPEVAGSCVRCGFRPRRVPDALYWWCDMCNYLHYA\*  
JX429893 UGA CUGGUG LVNHLEGNFEMPHDLPEVAGSCVRCGFRPRRVPDALYWWCDMCNYLHYA\*  
JX429892 UGA CUGGUG LVKHLEGDFEMPHDLPEIAGSCVRCGFRPRRVPDALYWWCDMCNYLHYA\*  
JX429886 UGA CUGGUG LVNYLEGDFEMPHDLPEIAGSCVRCGFRPRRVPDALYWWCDMCNYLHYA\*  
JX429880 UGA CUGGUG LVNYLEGDFEMPHDLPEIAGSCVRCGFRPRRVPDALYWWCDMCNYLHYA\*

## CLUSTER 5a

### Alignment of 3'UTRs from the 3 segments of a representative genome

```
RNA1      UAG-----
RNA2      UAA-----
RNA3      UAGCAAUUAGGUCGGGAUUAUUCCCGACUUCGGGAUGUAUCCCGACGUGCUAAAGUCCU
          * *

RNA1      -----
RNA2      -----
RNA3      AACGAUUUUUUGUUGGAUGCGAACCGCCUACGACAUUGAUUGUGUGAGCAGGCUCAU

RNA1      -----
RNA2      -----
RNA3      GAUGGUUAUCCUGAGGUUAAUCCUGCGGCUUUGAGACCAGGUUUUUCUCAGUGCCGAGG

RNA1      -----
RNA2      -----
RNA3      ACGGUUAGACGUUCUCGAAGGCUAAAUCCACGUUUAGUGGAUGAAGCGAAUUUACCAUAC

RNA1      -----
RNA2      -----
RNA3      UUCACAGGUGAGUGCGUGAGGUGUGGUUAUACUCCUAAGUCUCUCAUUGAUCAGAGAGAA

RNA1      -----GUAAA-----AUCU
RNA2      -----UUUCGUUUGUCGUUUUA-----CUAAAA-----AUCU
RNA3      UGGGAUUGUUAAGCUGUUUAUUGUUGUAUGCAGCUUGAAGAUUUCUAAAAUGAUUAUCU
          *** **

RNA1      U-----UAUGAGUUGUACCGGACUAGGUCCGAAGUUGUACAAGUAGUCUCCUCUCAUC
RNA2      UGUUUUAAUGCAAGUUAAGUUGGACAAGGUCCAGUGUAACUJAGGUAAGUUUCUCCUAUC
RNA3      UGUUUUAAUGCAAGUUAAGUUGGACAAGGUCCAGUGUAACUUAAGUAAGUUUCUCCUAUC
          * * *** ** * * * * * * * * * * * * * * * * * * * * * *

RNA1      GCCAUCUGGGUGGGUUUJAGGAGUCU AUGCCAAACUCUUGAGUUUGAUGCCAAUUCAG
RNA2      GCCAUCUGGAUGGGAUUUJAGGAGACU AUGGCAAACUCUUGAGUUUGAUGCCAAUUCAG
RNA3      GCCAUCUGGAUGGGAUUUJAGGAGACU AUGCCAAACUCUUGAGUUUGAUGCCAAUUCAG
          ***** ** * * * * * * * * * * * * * * * * * * * * * * * * * * * * * * * * * * * * * * *

RNA1      UUUUCGUCUGAAUUGAUGCCCGAAAGGAUGGC
RNA2      UUUUCGUCUGAAUUGAUGCCCGAAAGGAUGGC
RNA3      UUUUCGUCUGAAUUGAUGCCCGAAAGGAUGGC
          *****

RNA1 NC_006566 157 nt
RNA2 NC_006567 185 nt
RNA3 NC_006568 512 nt
```

### All sequences in the cluster

1 *Fragaria chiloensis* latent virus

Accession number / CP stop and 3'-adjacent 6 nt / CP-frame translation of sequence from immediately after CP stop codon to next in-frame stop codon (\*), if present, or to end of available sequence

```
NC_006568 UAG CAAUUA
QLGRDISRLRDVSRRAKVPNDFIVGCEPAYDIDMCEQAHDGYPEVNPVLRPRFFSVPRTVRRSRRLLNPRLVDEANLPYFTGECVRCGY
TPKSLIDQREWECSSCYMLYAA*
```

## CLUSTER 5b

### Alignment of 3'UTRs from the 3 segments of a representative genome

```
RNA1 -----UGAGACCGCGUUUA-----
RNA2 -----
RNA3 UAGCAGUUAGGUCGGGUAAUACCCAGUUUCGGUUUUAGCCCGACGCGUUGAGAUUCCU

RNA1 -----
RNA2 -----
RNA3 GGGAUUGAUCCAGAU GCGAGUUUGAUGCUC AAGGAUCGUUGACCUUUCGGUCAAGAUCA

RNA1 -----
RNA2 -----
RNA3 GUUCCGAGGGUUUUUAAUAGACCUCGAAGACUCAAUCCUAGAUUAUCUAAGGAGGAAGAA

RNA1 -----
RNA2 -----
RNA3 GAAGCCCUUGAUCAUUUCGAUCAAGUGGACAAUUCUGACGGUGCAGAUUAUCUGGAUGAU

RNA1 -----GUGGUCGUGUGGUUUUUAUUACCGAAAAUCUUGUUU
RNA2 -----UAGACGUGCGGUCGCGUGGUUUUUAUUACCGAAAAUCUUGUUU
RNA3 UGGCGAUCGUACGUUGAUUAGACGUGCGGUCGCGUGGUUUUUAUUACCGAAAAUCUUGUUU
      * * * * *

RNA1 CGAUGCAAGUUAAGUUGGACAAGGUCCGCUUAUAACUUAAGUAAGUUUCACCUAUCGCCA
RNA2 CGAUGCAAGUUAAGUUGGACAAGGUCCGCUUAUAACUUAAGUAAGUUUCACCUAUCGCCA
RNA3 CGAUGCAAGUUAAGUUGGACAAGGUCCGCUUAUAACUUAAGUAAGUUUCACCUAUCGCCA
      * * * * *

RNA1 UCUGGAUGGGGAUUAUGGAACUUAUGCCAAGCUCUUUAGAGUUUGAUGC UAAUUCAGUUUU
RNA2 UCUGGAUGGGGAUUAUGGAACUUAUGCCAAGCUCUUUAGAGUUUGAUGC UAAUUCAGUUUU
RNA3 UCUGGAUGGGGAUUAUGGAACUUAUGCCAAGCUCUUUAGAGUUUGAUGC UAAUUCAGUUUU
      * * * * *

RNA1 CGUCUGAAUUAUGCCCGAAAGGAUGGC
RNA2 CGUCUGAAUUAUGCCCGAAAGGAUGGC
RNA3 CGUCUGAAUUAUGCCCGAAAGGAUGGC
      * * * * *

RNA1 MN527502 197 nt
RNA2 MN527503 190 nt
RNA3 MN527504 448 nt
```

### All sequences in the cluster

32 Potato yellowing virus

Accession number / CP stop and 3'-adjacent 6 nt / CP-frame translation of sequence from immediately after CP stop codon to next in-frame stop codon (\*), if present, or to end of available sequence

```
MN527501 UAG CAGUUA
QLGRVEAQSRVLTTRVEIPRNIRCGFDTQGSLTLRSRSIPRVVPRRLNPRLSKKEEEALDYFDQVDNSDGDYLSDWRSYND*
MN527514 UAG CAAUCA
QSSRVSSRFRVLARRVEVPGIIPRCEFDAQGSLTSRSSVPRVVKPRRLNPRLSKKEEEALDHFDQVDSDGADYLNDWRSYVY*
MN527498 UAG CAGUUA
QLGRVNTQFRVLARRVEIPGIDPRCEFDAQGSLTLRSRSVPRVFRPRRLNPRLSKEEEALDHFDQVDNSDGDYLDDWRSYVD*
MN527504 UAG CAGUUA
QLGRVNTQFRVLARRVEIPGIDPRCEFDAQGSLTFRSRSVPRVFNPRRLNPRLSKEEEALDHFDQVDNSDGDYLDDWRSYVD*
MN418002 UAG CAGUUA
QLGRVNTQFRVLARRVEIPGIDPRCEFDAQGSLTLRSRSXXXXRPRRLNPRLSKEEEALDHFDQVDNSDGDYLDDWRSYVD*
```



MN548139 UAG CAAUUA  
QLGRVNTQFRVLARRVEIPGIDPRCEFDAQGSGLTLRSRSVPRVFNRPRLNPRLSKKEEEEALDHFQVDNSDGADYLDDWRSYVD\*  
MH937420 UAG CAAUUA  
QLGRVNTQSRVLARRVEIPGIDPRCEFDAQGSGLTLRSRSVPRVIRPRLNPRLSKKEEEEALDHFQVDNSDGADYLDDWRSYVD\*  
MN544551 UAG CAAUUA  
QLGRVNTQSRVLARRVEIPGIDPRCEFDAQGSGLTLRSRSVPRVFRPRLNPRLSKKEEEEALDHFQVDNSDGADYLDDWRSYVD\*  
MN527519 UAG CAAUCA  
QSSRVDSRFRVLARRVEVPGIIPRCEFDAQGSSTLRSRSVPRVVKPRLNPRLSKKEEEEALDYFDQVNSDGADYLNDWRSYVY\*  
MN527511 UAG CAAUCA  
QSSRVNSRFRVLARRVEVPGIIPRCEFDAQGSGLTLRSRSVPRVVKPRLNPRLSKKEEEEALDHFQVDNSDGADYLSWRSYVY\*  
MN527513 UAG CAAUCA  
QSSRVNSRFRVLARRVEVPGIIPRCEFDAQGSGLTSRSRSVPRVVKPRLNPRLSKKEEEEALDHFQVDNSDGADYLNDWRSYVY\*  
MN527474 UAG CAAUCA  
QSSRVNSRFRVLARRVEVPGIIPRCEFDAQGSGLTSRSRSVPRVVKPRLNPRLSKKEEEEALDHFQVDNSDGADYLNDWRSYVY\*  
MN527480 UAG CAAUCA  
QSSRVNSRFRVLARRVEVPGIIPRCEFDAQGSSTLRSRSVPRVVKPRLNPRLSKKEEEEALDHFQVDNSDGADYLSWRSYVY\*  
MN527492 UAG CAAUCA  
QSSRVNSRFRVLARRVEVPGIIPRCEFDAQGSSTLRSRSVPRVVKPRLNPRLSKKEEEEALDHFQVDNSDGADYLNDWRSYVY\*  
MN527495 UAG CAAUCA  
QSSRVNSRFRVFAARRVEVPGIIPRCEFDAQGSGLTLRSRSVPRVVKPRLNPRLSKKEEEEALDHFQVDNSDGADYLNDWRSYVY\*  
MN527505 UAG CAAUCA  
QSSRVKSRFRVLARRVEVPGIIPRCEFDAQGSGLTLRSRSVPRVVKPRLNPRLSKKEEEEALDHFQVDNSDGADYLSWRSYVY\*  
MN527507 UAG CAAUCA  
QSSRVNSRFRVLARRVEVPGIIPRCEFDAQGSSTLRSRSVPRVVKPRLNPRLSKKEEEEALDHFQVDNSDGADYLNDWRSYVY\*  
MN527512 UAG CAAUUA  
QLSRVNSRFRVLARRVEVPGIIPRCEFDAQGSGLTSRSRSVPRVVKPRLNPRLSKKEEEEALDHFQVDNSDGADYLSWRSYVY\*  
MN527516 UAG CAAUCA  
QSSRVNSRFRVLARRVEVPGIIPRCEFDAQGSSTLRSRSVPRVVKPRLNPRLSKKEEEEALDHFQVDNSDGADYLNDWRSYVY\*  
MN527518 UAG CAAUCA  
QSSRVNSRFRVFAARRVEVPGIIPRCEFDAQGSGLTSRSRSVPRVVKPRLNPRLSKKEEEEALDHFQVDNSDGADYLNDWRSYVY\*  
MN527508 UAG CAACUA  
QLSRVNSRFRVLARRVEVPGIIPRCEFDAQGSSTLRSRSVPRVVKPRLNPRLSKKEEEEALDHFQVDNSDGADYLSWRSYVY\*  
MG672022 UAG CAAUCA  
QSSRVNSRFRVLARRVEVPGIIPRCEFDAQGSGLTSRSRSVPRVVKPRLNPRLSKKEEEEALDHFQVDNSDGADYLNDWRSYVY\*  
MN527471 UAG CAAUCA  
QSSRVNSRFRVLARRVEVPGIIPRCEFDAQGSGLTFRSRSVPRVVKPRLNPRLSKKEEEEALDHFQVDNSDGADYLSWRSYVY\*  
MN527483 UAG CAAUCA  
QSSRVNSRFRVLARRVEVPGIIPRCEFDAQGSGLTLRSRSVPRVVKPRLNPRLSKKEEEEALDHFQVDNSDGADYLSWRSYVY\*  
MN527486 UAG CAAUCA  
QSSRVNSRFRVLARRVEVPGIIPRCEFDAQGSGLTSRSRSVPRVVKPRLNPRLSKKEEEEALDHFQVDNSDGADYLNDWRSYVY\*  
MN527489 UAG CAAUCA  
QSSRVNSRFRVLARRVEVPGIIPRCEFDAQGSSTLRSRSVPRVVKPRLNPRLSKKEEEEALDHFQVDNSDGADYLNDWRSYVY\*  
MN527506 UAG CAAUCA  
QSGRVNSRFRVLARRVEVPGIIPRCEFDAQGSGLTLRSRSVPRVVKPRLNPRLSKKEEEEALDHFQVDNSDGADYLSWRSYVY\*  
MN527509 UAG CAAUUA  
QLGRVNSRFRVLARRVEVPGIIPRCEFDAQGSGLTLRSRSVPRVVKPRLNPRLSKKEEEEALDHFQVDNSDGADYLNDWRSYVY\*  
MN527510 UAG CAAUUA  
QLGRVNSRFRVLARRVEVPGIIPRCEFDAQGSGLTLRSRSVPRVVKPRLNPRLSKKEEEEALDHFQVDNSDGADYLNDWRSYVY\*  
MN527515 UAG CAAUCA  
QSSRVNSRFRVLARRVEVPGIIPRCEFDAQGSGLTSRSRSVPRVVKPRLNPRLSKKEEEEALDHFQVDNSDGADYLNDWRSYVY\*  
MN527517 UAG CAAUUA  
QLSRVNSRFRVLARRVEVPGIIPRCEFDAQGSGLTSRSRSVPRVVKPRLNPRLSKKEEEEALDHFQVDNSDGADYLNDWRSYVY\*  
MN527477 UAG CAAUCA  
QSSRVNSRFRVLARRVEVPGIIPRCEFDAQGSGLTLRSRSVPRVVKPRLNPRLSKKEEEEALDHFQVDNSDGADYLSWRSYVY\*

## CLUSTER 6a

### Alignment of 3'UTRs from the 3 segments of a representative genome

```
RNA2      UAAAUUGAAAGUUAGAAAGAGCGGGAGGCUCGAAGUUCUAAUUUGAGGAGCGUGGAGCUC
RNA3      UGAUGGAGCGAUUAGCUC - - - CGUCUCGCGUGAAA - - - - - GAGGACUGUGAAGCUC
RNA1      UGAGCGGGAGGCUCGAUA - - - GUUUUAUGUGG - - - - - GAGGAGCGUGAAGCUC
          * *                * *                *                *                * * * * * * * * * * * *

RNA2      GAAGUUCGAGAGGGAACUGAAGCAUAUCGUGAGGAUAUGCGUUGUAGGG - - GAGAUGGA
RNA3      GAAGUUCGAGAGGGAACUAAAGCAUAUCGCGAGGAUAUGCGAUGUAGGGGUGAGAUGGA
RNA1      GAAGUUCGAGAGGGAAGUGAAGCAUGUCGUGAGGAUAUGCAGUGUAGGG - - GAGAUGGA
          * * * * * * * * * * * * * * * * * * * * * * * * * * * * * * * * * * * * * * * *

RNA2      CCCCAGACUCGAUUAGAGUCAGACCGUACCACCGCUAGUGGAUUUGCGGUCAGUUUUC
RNA3      CCCCAGACUCGAUUAGAGUCAGACCGUACCACCGAUAGUGGGUUUGCGGUCAGUUUUC
RNA1      CCCCAGACUCGAUGAGAGUCAGACCGUACCACCGAUUGUGGGUUGCGGUCAGUUUGCC
          * * * * * * * * * * * * * * * * * * * * * * * * * * * * * * * * * *

RNA2      GAGCGUCGCCUCCUUAGGCGUGUCCUAGGAAAACAACAACUCAGUGUGGAGUUGAUUCCA
RNA3      GAGCGUCGCCUCCUUAGGCGUGUCCUAGGAAAACAACAACUCGAUGUAGAGUUGAUUCCA
RNA1      GAGCGUCGCCCGUUGAGGCGUGUCCUAGGAAGACAACAACUCGACGUAGAGUUGAUGCCA
          * * * * * * * * * * * * * * * * * * * * * * * * * * * * * * * * * *

RNA2      AUUUCUGUGAAAGAAAUUGAUGCCCCGAUUAGGAGGC
RNA3      AUUUCUGUGAAAGAAAUUGAUGCCCCGAUUAGGAGGC
RNA1      AUGUCUGUGAAAGAAAUUGAUGCCCCGAUUAGGAGGC
          * * * * * * * * * * * * * * * * * * * * * * * * * * * * * * * * * *
```

RNA1 NC\_003464 260 nt  
RNA2 NC\_003465 275 nt  
RNA3 NC\_003480 265 nt

**Note:** No insert in RNA3, so no evidence for RT domain.

### All sequences in the cluster

12 Apple mosaic virus

Accession number / CP stop and 3'-adjacent 6 nt / CP-frame translation of sequence from immediately after CP stop codon to next in-frame stop codon (\*), if present, or to end of available sequence

```
L03726      UGA UGGAGC WSD*
KY971021    UGA UGGAGC WSG*
MT303163    UGA UGGAGC WSD*
HG328281    UGA UGGAGC WSD*
HG328280    UGA UGGAGC WSD*
KY971019    UGA UGGAGC WSD*
MN822139    UGA UGGAGC WSD*
KY883320    UGA UGGAGC WSD*
KY488189    UGA UGGUGC WCQLVPLARKWTVKLDVPRGNLSX
HE574164    UGA UGGAGC WSD*
NC_003480   UGA UGGAGC WSD*
KY971020    UAG UGUGGG CGMSVKLEVPRGN*
```

## CLUSTER 6b

A subgroup of apple mosaic virus sequences (see below) have a longer downstream ORF and a UAG CAA UCA or UAG CAA UUA (consistent with a UAG CAR YYA readthrough motif). In the absence of RNA1/RNA2 sequences for the corresponding genomes, below is an alignment between a representative Cluster 6b sequence (HG328285) and a representative Cluster 6b sequence (NC\_003480). Note the clear insert immediately following the CP stop codon, indicating a RT domain in Cluster 6b sequences. However, this appears to have evolved independently of the RT Zn-finger domain in other ilarviruses.

```
HG328285      CCACCUUGUGCAAUACCGUCGAAUGUUCUACUUAUCGAUGAAGAUCUGUUAGAUUUAUAG
NC_003480     CCACCGGUGCAAUACCGACGAAUGUUCUACUUAUCGAUGAAGAUUUGUUAGAAUUA - -
*****

HG328285      CAAUCAGGAAGUCAGAUUUCAAUAUCGUGAGGAUAAUUGAUAAUCUAGACGAUUUGAUG
NC_003480     -----UGAUG
*****

HG328285      GAGAGAUUUGCUCCGU-----AUGCAGAAGGAGCGUGAAGCUCGAAGUCCGAGAAGGAA
NC_003480     GAGCGAUUAGCUCCGUCUCGCGUGAAAGAGGACUGUGAAGCUCGAAGUCCGAGAGGGAA
*****

HG328285      CUGAAAUAUUCGAGAGGAUUAUUGUUGUAGGG--GAAAAGGACCCCGAGACUCGAUUAG
NC_003480     CUAAGCAUUCGCGAGGAUUCGAUGUAGGGGUGAGAUUGGACCCCGAGACUCGAUUAG
*****

HG328285      AGUCAGACCGUACCACCAUAGUGGGUUUGCGGUCAGUUUUCUGAGCGUCGUCUCCUAG
NC_003480     AGUCAGACCGUACCACGAUAGUGGGUUUGCGGUCAGUUUUCGAGCGUCGCCUCCUAG
*****

HG328285      ACGUGUCCUAGGAAAACAACAACUCGAUUAUAGAG-----
NC_003480     GCGUGUCCUAGGAAAACAACAACUCGAUUAUAGAGUUUCCAAUUUCUGUGAAAGAAU
*****

HG328285      -----
NC_003480     UGAUGCCCCGAUAGGAGGC
```

### All sequences in the cluster

8 Apple mosaic virus

Accession number / CP stop and 3'-adjacent 6 nt / CP-frame translation of sequence from immediately after CP stop codon to next in-frame stop codon (\*), if present, or to end of available sequence

```
AM490197  UAG CAAUCA QSRGQGNIVKIFDNLDELMERLAPYAEGA*
HG328285  UAG CAAUCA QSGSQISNIVRIFDNLDDLMEFAPYAEGA*
HG328282  UAG CAAUCA QSRGQNSNIVKIFDNLDDLMEFAPYAEGA*
HG328283  UAG CAAUCA QSGGQISNIVRIFDNLDVLMERFAPYAEGA*
HG328284  UAG CAAUCA QSGGQISNIVRIFDNLDVLMERFAPYAEGA*
HG328276  UAG CAAUCA QSRGQNSNIVKIFDNLDELMERX
HG328279  UAG CAAUUA QLRGQNSNIVKIFDNLDELMERX
HG328277  UAG CAAUUA QLRGQTSNIVKIFDNLDELMERX
```

## CLUSTER 7

### Alignment of 3'UTRs from the 3 segments of a representative genome

```
RNA1      UAGGUU - CGAUG - - CAGAACUGAACCCCGAUUAGGGUAGAACCGGACCACCGUGUGGGUU
RNA2      UAGGUUGAGAUGAACACAACCGAACCCCGAUUAGGGUAGAACCGGACCACCGUGUGGGUU
RNA3      UAGGUUGAGAUGAACACAACCGAACCCCGAUUAGGGUAGAACCGGACCACCAUGUGGGUU
          *****  *****  **  ***  *****  *****  *****  *****

RNA1      UU - - CCGGUUAUCUCCGAGAGUCGCUUUCAGACUCAUGCUA - AGGAGAUUACCUACGA
RNA2      UUCCACCGGUUGUCUCCGAGAGUCGCUUUCAGACUCGUGGUUUAGGAGAUUACCUACGA
RNA3      UU - - CCGGUUAUCUCAGAGAGUCGCUUUCAGACUCGUGUUCUAAGAGAUUACCUACGA
          **      *****  *****  *****  *****  *****  *****

RNA1      AAGUAGAUGCCCGAUCCGUGAAGGAUCGGAUGCCCCGUUAGGGAAGC -
RNA2      AAGUAGAUGCCCAAUCCGUGAAGGAUUGGAUGCCCCGUUAGGGAAACC
RNA3      AAGUAGAUGCCCAAUCCGUGAAGGAUUGGAUGCCCCGUUAGGGAACC -
          *****  *****  *****  *****  *****  *****
```

```
RNA1 NC_040469 160 nt
RNA2 NC_040471 168 nt
RNA3 NC_040470 164 nt
```

**Note:** No insert in RNA3, so no evidence for RT domain.

### All sequences in the cluster

15 Apple necrotic mosaic virus

Accession number / CP stop and 3'-adjacent 6 nt / CP-frame translation of sequence from immediately after CP stop codon to next in-frame stop codon (\*), if present, or to end of available sequence

```
MN832845  UGA GCACAA AQPNDKGRTPGPCGFSGYLRESLLRLKLRRLPTKVDAQSVKDWMPR*
MN911185  UAG GUUGAG VEMNTTEPR*
KY808384  UAG GUUGAG VEMNTTEPR*
MN911186  UAG GUUGAG VEMNTTEPR*
KY808390  UAG GUUGAG VEMNTTEPR*
MG924901  UAG GUUGAG VEMNTTEPR*
KY808378  UAG GUUGAG VEMNTTEPR*
KY808381  UAG GUUGAG VEMNTTEPR*
NC_040470 UAG GUUGAG VEMNTTEPR*
MN656200  UAG GUUGAG VEMNTTEPR*
KY808387  UAG GUUGAG VEMNATEPR*
MN023212  UAG GUUGAG VEMNTTEPR*
KY808393  UAG GUUGAG VEMNTTEPR*
MG924900  UAG GUUGAG VEMNTTEPR*
MG924902  UAG GUUGAG VEMNTTEPR*
```

Note that the UGA (instead of UAG) CP stop codon and extended downstream peptide of sequence MN832845 are the result of a 4-nt frame-changing deletion at the end of the CP ORF (see alignment below). This could be a real mutation or could be a sequencing error. There is no large insertion and therefore no evidence for a RT domain in this sequence.

**UAG** CP stop codon in NC\_040470

**UGA** Apparent CP stop codon in MN832845

```
MN832845  CGAAUCGUGAUCCCGAGUGACAUUCUAAUGGUCGAUGAAGACCUUUUGGAUGU - - - GUU
NC_040470  CGAAUCGUGAUCCCGAAUGAUUCCUUAUGGUCGAUGAAGACCUUUUGGAUGUCUAGGUU
          *****  *****  *****  *****  *****  *****

MN832845  GAUAUGAGCACAACCGAACCCCGAUUAGGGUAGAACCGGACCACCUUGUGGGUUUUCGG
NC_040470  GAGAUGAACACAACCGAACCCCGAUUAGGGUAGAACCGGACCACCAUGUGGGUUUUCGG
          **  ***  *****  *****  *****  *****

MN832845  UUAUCUCCGAGAGUCGCUUCUCAGACUCAAGCU - UAGGAGAUUACCUACGAAAGUAGAUG
```

NC\_040470

UUAUCUCAGAGAGUCGCUUCCAGACUCGUGUUCUAAGAGAUUACCUACGAAAGUAGAUG  
\*\*\*\*\*

MN832845  
NC\_040470

CCCAAUCCGUGAAGGAUUGGAUGCCCCGUUAGGGAUG-  
CCCAAUCCGUGAAGGAUUGGAUGCCCCGUUAGGGAACC  
\*\*\*\*\*

## CLUSTER 8a

### Alignment of 3'UTRs from the 3 segments of a representative genome

```

RNA1 -----
RNA2 -----
RNA3 UGA CUACACUCGGACGAUUGUCCGAGUCAAAAGUGUCAUCCUUCUGUCAUUGCGAAUGU

RNA1 -----
RNA2 -----
RNA3 UAUGACAAUGCUUGCGGUACACCUUGGUGUCCUGCUAAUGCCAAUUGUUCCAUGAAUUU

RNA1 -----
RNA2 -----UGAUGUGUUCUUUCAUGGAAUCUAGCAAGGAGCCUCAGGGGUGC
RNA3 CAUGAAAAUUAUUGAUGACGUGUUCUUUCAUAGAAUCUAGCAAGGAGCCUCAGGGGUGC

RNA1 -----UAAGUCCAUAUGCCCAUCUCUGCUACUCCGGAUGGAUGUC
RNA2 ACUCAGUGCCUAGUCCACGCUAAGUCUUAUUGCCCACCUUUGCUACUCCGGGUGGAUGCU
RNA3 ACUCAGUGCCUAGUCUACGCUAAGUCUUAUUGCCCACCUUUGCUACUCCGGGUGGAUGUU
      *****  *****  *  *****  *****

RNA1 UAUAUGCCCGCUAUGGAUGCCUAAUUAUUGAAAUAAUAUAGAUGCCUAAUACUCUCUCUCA
RNA2 U-UAAGUGCA-UGUAGAUCCUAAUUAUUGAAAUAAUAUAGAUGCCCAG-ACUCUCUCUCU
RNA3 C-UAAGUGUA-UAUAGAUCCUAAUUAUUGAAAUAAUAUAGAUGCCCAA-ACUCUCUCUCA
      ** *      * * *****  *****  *****  *  *****

RNA1 GGGAGAGAGUUUAGAUGCCUCCGAAGGAGAUGC
RNA2 UGGAGAGAGAAUGGAUGCCUCCGAAGGAGAUGC
RNA3 UGGAGAGAGAAUGGAUGCCUCCGAAGGAGAUGC
      *****  *  *****

RNA1 NC_009537 133 nt
RNA2 NC_009538 195 nt
RNA3 NC_009536 330 nt

```

### All sequences in the cluster

#### 4 Citrus variegation virus

Accession number / CP stop and 3'-adjacent 6 nt / CP-frame translation of sequence from immediately after CP stop codon to next in-frame stop codon (\*), if present, or to end of available sequence

```

NC_009536 UGA CUACAC LHSDDCPSQSVIPFCHCECYDNACGTPWCPANANCFHEFHENY*
MZ330111 UGA CUACAC LHSDDCPRQCVISFCHCECYDNACSTPWCPANTNCFHEFHEDY*
MZ330094 UGA CUACAC LHSDDCPRQSVISFCHCECYDNACSTPWCPANANYFHEFHEDY*
MZ330098 UGA CUACAC LHSDDCPRQCVISFCHCECYDNACSTPWCPANANYFHEFHEDY*

```

## CLUSTER 8b

### Alignment of 3'UTRs from the 3 segments of a representative genome

```
RNA1 -----
RNA2 -----
RNA3 UGA CUACACUCGGGUGAUUACCUCCAUUCUGUUGAAUGUGAGAGGAAGUGUGAUUCCA
```

```
RNA1 -----
RNA2 -----
RNA3 UUCUGUCAUUGCGUGUGCUAUGACGAUGCUUGCGAUGUUCUUUGGUGUUCUCCCAAUGAU
```

```
RNA1 -----UAGUGUUUCUUUCAUGAAACCUAGUGA
RNA2 -----UAGUGUUUCUUUCAUGAAACCUAGUGA
RNA3 UUAUGUUACCACGAGUCUAAUGACUGGUGAUGUUAGUGUUUCUUUCAUGAAACCUAGUGA
*****
```

```
RNA1 AGGGUCCUCCGGGAUGUGCUCAGCACCUAGCCUAAGCUAAGUCCAUAUGCCCAUCUUUGC
RNA2 AGGGUCCUCCGGGAUGUGCUCAGCACCUAGCCUAACUAAGUCCAUAUGCCCAUCUUUGC
RNA3 AGGAUCCUCCGGGAUGUGCUCAGCACCUAGCCUAACUAAGUCCAUAUGCCCAUCUUUGC
*** *****
```

```
RNA1 UGCUCGGGAUGGAUGUUUAAUACCCGCUAUGGAUGCCUAAUUAUUG-AAUUAUUAGAUGCC
RNA2 UGCUCGGGAUGGAUGUUAAUACCCGCUAUGGAUGCCUAAUUAUUGAAUUAUUAGAUGCC
RNA3 UGCUCGGGAUGGAUGUUAAUACCCCUAUGGAUGCCUAAUUAUUGAAAAUAAUAGAUGCC
*****
```

```
RNA1 UAAUUCUCUCUCUCAGGGAGAGAGAUUAGAUGCCUCCAGGAGAUGC
RNA2 UAAUUCUCUCUCUCAGGGAGAGAGAUUAGAUGCCUCCAAGGAGAUGC
RNA3 UAAUUCUCUCUCUCAGGGAGAGAGAUUAGAUGCCUCCAAGGAGAUGC
*****
```

```
RNA1 NC_003569 193 nt
RNA2 NC_003568 194 nt
RNA3 NC_003570 347 nt
```

### All sequences in the cluster

- 4 Elm mottle virus
- 1 Hydrangea mosaic virus (AF172965)

Accession number / CP stop and 3'-adjacent 6 nt / CP-frame translation of sequence from immediately after CP stop codon to next in-frame stop codon (\*), if present, or to end of available sequence

```
LT898352 UGA CUACGC LRS GDYLHS IE CERK SVIPFCHC ICYDNACDVLWCSANDLCYHESNDW*
OL584365 UGA CUACGC LRS GDYLHS IE CERK SVIPFCHC ICYDNACDVLWCSANDLCYHESNDW*
AF172965 UGA CUACAC LHS GDYLHS VECERK CVIPFCHCVCYDDACDVLWCSANDLCYHESNDW*
NC_003570 UGA CUACAC LHS GDYLHS VECERK CVIPFCHCVCYDDACDVLWCS PNDLCYHESNDW*
U57048 UGA CUACAC LHS GDYLHS VECERK CVIPFCHCVCYDDACDVLWCSANDLCYHESNDW*
```

## CLUSTER 9

### Alignment of 3'UTRs from the 3 segments of a representative genome

```

RNA1      UGAUAGAAGUGAUUUGAUCACACUUCGAAUAGGGUUU - GUAACCCGAAUACCGGUCCUCC
RNA2      -----UGAUUCAUCACACUUCG -- UAGGGCCU --- AGGCCAUUACCGGUCCUCC
RNA3      ---UAG AAGUGAUUUGAUCACACUUCGAUUGAACC GUGAAGGUUCGAUACCGGUCCUCC
                *****  *****          ***          *          *****

RNA1      UUGAGGAUUUCCCGGUAGAGUCUAUAAGAUUUCGCCUUCGGAAUUCGACGAUCUAUAGAU
RNA2      GUGAGGAUUUCCCGGUAGAAUCUAUAGAUUCUUGCCUCUCAAGAUCUGUGAUGGUUAGAU
RNA3      GUGAGGAUUUACCGGUAGAAUCUAUUGUAUCUCGCCUC - CGAGAUACAUGAUCGAUAGAU
                *****  *****  *****  * * * ***** * * * *  *****  *****

RNA1      UCAACAACCGAUUUGGUUGAUUCCUAUUCUGUGAAAGAAUUAGAUGCCCCGAUAGGGA
RNA2      UCAACAUCGUAUUGAUUUGAUUCCUAAUUCGUGAAGGAAUUAGAUGCCCCGAUAGGGA
RNA3      UCAACAACCGAUUUGGUUGAUUCCUAAUUCGUGAAGGAAUUAGAUGCCCCGACAGGGA
                *****  **  *****  *****  *****  *****  *****  *****
    
```

```

RNA1 NC_022250 178 nt
RNA2 NC_022251 165 nt
RNA3 NC_022252 175 nt
    
```

**Note:** No insert in RNA3, so no evidence for RT domain.

### All sequences in the cluster

7 Blueberry shock virus

Accession number / CP stop and 3'-adjacent 6 nt / CP-frame translation of sequence from immediately after CP stop codon to next in-frame stop codon (\*), if present, or to end of available sequence

```

KY927866 UAG AAGUGA K*
KF031042 UAG AAGUGA K*
NC_022252 UAG AAGUGA K*
KY927865 UAG AAGUGA K*
KY927862 UAG AAGUGA K*
KY927864 UAG AAGUGA K*
KY927863 UAG AAGUGA K*
    
```



## CLUSTER 10

### Alignment of 3'UTRs from the 3 segments of a representative genome

```

RNA1      UGAU-----UAAUUUCAAGUCCACAUAGUGAU-----
RNA2      UAAUGGCAACCGAUC-----
RNA3      UGA CGGUCACAAGUCCGAGUCCAAGACUCGAGUUGCCGUACUUCACUGAAAAGUGUGUA
          * *                *

RNA1      -----GCCCAU-----UUGGGAAGAGAACUCUGGAAG-----
RNA2      -----GCAUC-----UUAUCGGUGUAUU-----
RNA3      CGAUGCGGGUUUGCACCAAAGUAUACUGUAGAUCAGUAUUAUUUGGAAGUGUCACGUGUGU
          ** *                * * * *

RNA1      -----CACUUCUCACGCUUCAAGAGAAGCCCA-GUGUUCUAAUACC
RNA2      -----GAGUUUA---AUUCUAC-----
RNA3      UCUUAUGAACACUACGCAUAGUUGUCACGCACCGGGCGUAAAUCUUGAAUUCGCUAUU
          * * * *

RNA1      AA-----
RNA2      -----
RNA3      AAGUGGUCCGUUUUGGACUUAACCUUGAAUCGUAAGAUUCAUGAGGCCUUUGGGCCGCCA

RNA1      -----UACUACCUAAUGGUAGUAUUGAUGCCUCCAAAAGGAGAAG
RNA2      -----UAGUAUCUAAUGAUACUAGUAAUGCCUCCAAAAGGAGAUG
RNA3      CUUAAGAACGAUGCACUAGUAUUAUUAUACUAGUAAUGCCUCCAAAAGGAGAUG
          ** **      ** * * * * *

RNA1 OL472060 139 nt
RNA2 OL472061 88 nt
RNA3 OL472062 294 nt

```

### All sequences in the cluster

- 4 Solanum nigrum ilarvirus 1
- 1 Surrounding legume associated ilarvirus (MN412727)
- 1 Grapevine associated ilarvirus (MN520744)
- 1 Erysiphe necator associated ilar-like virus 1 (MN630188)

Accession number / CP stop and 3'-adjacent 6 nt / CP-frame translation of sequence from immediately after CP stop codon to next in-frame stop codon (\*), if present, or to end of available sequence

```

MN520744  UGA CGGUCA RSQVSPRLELPYFTEKCVRCGFAPKYTVDQYIWKCHVCSYEHYA*
MN412727  UGA CGGUCA RSQVSPRLELPYFTEKCVRCGFAPKYTVDQYIWKCHVCSYEHYA*
OL472062  UGA CGGUCA RSQVSPRLELPYFTEKCVRCGFAPKYTVDQYIWKCHVCSYEHYA*
MN216376  UGA CGGUCA RSQVSPRLDLPYFTEKCVRCGFAPKYTVDQYIWKCHVCSYEHYA*
MN216377  UGA CGGUCA RSQVSPRLELPYFTEKCVRCGFAPKYTVDQYIWKCHVCSYEHYA*
MN216378  UGA CGGUCA RSQVSPRLELPYFTEKCVRCGFAPKYTVDQYIWKCHVCSYEHYA*
MN630188  UGA CGGUCA RSQVSPRLELPYFTEKCVRCGFAPKYTVDQYIWKCHVCSYEHYA*

```

## CLUSTER 11

### Alignment of 3'UTRs from the 3 segments of a representative genome

```

RNA3      UGACUGUCUCCAUCCUCGAGUUUGAUCUCGAGUUGCCUCACAUUAAGAAUAAUUCUUGUG
RNA1      -----
RNA2      -----

RNA3      UGAGAUGC GGAUAUCACCCUAUGUAUGUUGUAGAUAACAUAUAUGGAAGUGUGAUGUGU
RNA1      CGCAAUGC-----CUAUUUAAUUAUCCAACAAGAAG-----
RNA2      -----UAACAUG-----
                      ****

RNA3      GUCAUCAAGACACUAUGCAUAGUUACCACGCAUCCGGGUGUAAAUCUAUGUUAUCCGUU
RNA1      -----GCGUCUGAGCGC--AUCUUUCUCAGAUUU
RNA2      -----GCAGCUGAGCGC--AUCUAUCUCAGUGGUU
                      ** * * * * * * * * * *

RNA3      UAGAACAUCCGAAUCGGACGAUUUCCACUCUAUGAGUGAGACCUUUGGGUCGAUGUUCU
RNA1      GUUGAUGUUCCAUA-----AAUAUCA-----
RNA2      AAUGA--UUGCUAUU-----AAUAUCA-----
                      * ** * * * * ** * * *

RNA3      AUGUUGCCAUAUAAUAAUUUAAAAUUAAUUAUGAUGCCUCCUAAGGAGAUGC
RNA1      -----UUGAUAAUUAUGAUGCCUCUAAUUUAUAGAGAUGC
RNA2      -----AUGAUAAUAAUAAUGCCUCCAAUUU--GGAGAUGC
                      * * * * * * * * * *

RNA1 NC_008708 122 nt
RNA2 NC_008707 89 nt
RNA3 NC_008706 292 nt

```

### All sequences in the cluster

5 Strawberry necrotic shock virus

Accession number / CP stop and 3'-adjacent 6 nt / CP-frame translation of sequence from immediately after CP stop codon to next in-frame stop codon (\*), if present, or to end of available sequence

```

NC_008706 UGA CUGUCU LSPSSSLISSCLTLRIILV*
KU053514 UGA CUAUCU LSPILESNLELPHIKGNSCVRCGYHPMYVVDQHIWTCDVCRQRQYA*
JF781586 UGA CUAUCU LSPILESNLELPHIKGNSCVRCGYHPMYVVDQHIWTCDVCRQRQYA*
JF781587 UGA CUAUCU LSPILESNLELPHIKGNSCVRCGYHPMYVVDQHIWTCDVCRQRQX
JF781588 UGA CUAUCU LSPILESNLELPHIKGNSCVRCGYHPMYVVDQHIWTCDVCRQRQX

```

The truncated downstream peptide in NC\_008706 occurs as a result of a single nucleotide deletion 9 nt downstream of the stop codon:

```

NC_008706 UGACUGUCUCCAUCCUCGAGUUUGAUCUCGAGUUGCCUCACAUUAAGAAUAAUUCUUGU
KU053514 UGACUAUCUCCAUCCUCGAGAGUAAUCUCGAGUUGCCUCACAUUAAGGUAUUCUUGU
JF781586 UGACUAUCUCCAUCCUCGAGAGUAAUCUCGAGUUGCCUCACAUUAAGGUAUUCUUGU
JF781587 UGACUAUCUCCAUCCUCGAGAGUAAUCUCGAGUUGCCUCACAUUAAGGUAUUCUUGU
JF781588 UGACUAUCUCCAUCCUCGAGAGUAAUCUCGAGUUGCCUCACAUUAAGGUAUUCUUGU
*****

NC_008706 GUGAGAUGC GGAUAUCACCCUAUGUAUGUUGUAGAUAACAUAUAUGGAAGUGUGAUGUG
KU053514 GUGAGAUGC GGAUAUCACCCUAUGUAUGUUGUAGAUAACAUAUAUGGACGUGUGACGUA
JF781586 GUGAGAUGC GGAUAUCACCCUAUGUAUGUUGUAGAUAACAUAUAUGGACGUGUGACGUA
JF781587 GUGAGAUGC GGAUAUCACCCUAUGUAUGUUGUAGAUAACAUAUAUGGACGUGUGACGUA
JF781588 GUGAGAUGC GGAUAUCACCCUAUGUAUGUUGUAGAUAACAUAUAUGGACGUGUGACGUA
*****

```

If the deletion in NC\_008706 is replaced with an "A", the RT peptide is restored:

```

NC_008706 LSPILEFDLELPHIKNNSCVRCGYHPMYVVDQHIWKCDVCHQRHYA*

```

KU053514 LSPILES NLELPHIKGNS CVRCGYHPMYVVDQHIWTC DVCRQRQYA\*  
JF781586 LSPILES NLELPHIKGNS CVRCGYHPMYVVDQHIWTC DVCRQRQYA\*  
JF781587 LSPILES NLELPHIKGNS CVRCGYHPMYVVDQHIWTC DVCRQRQX  
JF781588 LSPILES NLELPHIKGNS CVRCGYHPMYVVDQHIWTC DVCRQRQX



## CLUSTER 13

### Alignment of 3'UTRs from the 3 segments of a representative genome

```

RNA1 -----
RNA2 -----
RNA3 UGA CUACACUCGGACGAUUGUUCGAGUAGAAAUGUCAUCCUUUUUGCCAUUGCUC AUGU

RNA1 -----UAGUG-----
RNA2 -----UGAUGUG-----
RNA3 UGCCUUUUCACUGUGAUGUGAUAGGAUGUGUGUGCAAUGAUGCCUUCUUUUACGAAGAU
      *   **

RNA1 ----UUUUUUUUUAAAAACUGGUUAAGGGUCCUCCGGGAUGUGCUCAGCACCUAGCCUA
RNA2 ----UUCCUUUCAUGGAACCUAGUGAGGGGCCUCCGGGGUGUGCUCAGCACCUAGCCUA
RNA3 UAGUGUUCCUUC AUGGAACCUAGGUAAGAGGUCCUCCGGGAUGUGCUCAGCACCUAGCUUA
      *   ** * * * * * * * * * * * * * * * * * * * * * * * * * * * * * *

RNA1 AGCCAAGUCCAUAUGCCACCUAUGCUGCUCUCCGGGUGGAUGCUUAUACAUGCUAUGGAUG
RNA2 AGCUAAGUCCAUAUGCCACCUACGCUGCUCUCCGGGUGGAUGCUUAUACAUGCUAUGGAUG
RNA3 AGCCAAGUCCAUAUGCCACCUUCGCUGCUCUCCGGGUGGAUGCUUAUACAUGCUAUGGAUG
      * * * * * * * * * * * * * * * * * * * * * * * * * * * * * * * * * *

RNA1 CCUACAUUUGAAAUA AUGUAGAUGCCUAAUACUCUCUCUCAGGGAGAGAGUUUAGAUGCC
RNA2 CCUACAUUUGAAAUA AUGUAGAUGCCUAAUACUCUCUCUCAGGGAGAGAGUUUAGAUGCC
RNA3 CCUACAUUUGAAAUA AUGUAGAUGCCUAAUACUCUCUCUCAGGGAGAGAGUUUAGAUGCC
      * * * * * * * * * * * * * * * * * * * * * * * * * * * * * * * * * *

RNA1 UCCAAAGGAGAUGC
RNA2 UCCAAAGGAGAUGC
RNA3 UCCAAAGGAGAUGC
      * * * * * * * * * *

RNA1 NC_003808 195 nt
RNA2 NC_003809 197 nt
RNA3 NC_003810 314 nt

```

### All sequences in the cluster

4 Spinach latent virus

Accession number / CP stop and 3'-adjacent 6 nt / CP-frame translation of sequence from immediately after CP stop codon to next in-frame stop codon (\*), if present, or to end of available sequence

```

KY695014 UGA CUACAC LHSDDCSSRNVIPFCHCSCCPFHCDVIGVCNDAFFYED*
MT269815 UGA CUACAC LHSDDCSSRNVIPFCHCSCCPFHCDVIGVCNDAFFYED*
OK044131 UGA CUACAC LHSDDCSSRNVIPFCHCSCCPFHCDVIGVCNDAFFYED*
NC_003810 UGA CUACAC LHSDDCSSRNVIPFCHCSCCPFHCDVIGVCNDAFFYED*

```

## CLUSTER 14

### Alignment of 3'UTRs from the 3 segments of a representative genome

```
RNA2 -----
RNA1 -----
RNA3 UGACCACGCUCGGGUGAGUGUGUAUACCUCCAUUCUAAUGAAUGUGAGAAGAAAAAUGUG

RNA2 -----
RNA1 -----
RNA3 AUUCCAUUCUGUCAUUGUGAAUGUUUAUGACAAUGCUUGCAACACCUUGGGUGUCCUGCA

RNA2 -----UGACGUGUUUCUUUCAUGAAACC
RNA1 -----
RNA3 AAUGUCUUUUGUUUCCACGAACCUUAAUGGUUAGUGAUGAAGUGUUUCUUUCAUGAAACC

RNA2 UAGUGAAGGGUCCUCCGGGAUGUGCUCAGCACCUGCCUAAGCUAAGUCCAUAUGCCCAU
RNA1 -----UAAGUCCAUAUGCCCAU
RNA3 UAGUGAAGGGU-CUCCGGGAUK-GCUCAGCACCUGCCUAAGCUAAGUCCAUAUGCCCAU
*****

RNA2 CUUCGCGUCUCCGGAUGGAUGUUUAUACCCGCUAUGGAUGCCUAAUACUGAAAUGUAAUA
RNA1 CUUUGCUGCUCGGAUGGAUGUUUAUACCCGCUUGGGAUGCCUAAUACUGAAAUGUAAUA
RNA3 CUUUGCUGCUCGGAUGGAUGUUUAUACCCGCUAUGGAUGCCUAAUACUGAAAUGUAAUA
*** *****

RNA2 GAUGCCUAAUACUCUCUCUCAGGGAGAGAGUUUAGAUGCCUCAAAGGAGAUGC-
RNA1 GAUGCCUAAUACUCUCUCUCAUGGAGAGAGUUUAGAUGCCUCAAAGGAGAUGC-
RNA3 GAUGCCUAAUACUCUCUCUCAGGGAGAGAGUUUAGAUGCCUCAAAGGAGAUGC
*****
```

RNA1 NC\_011808 131 nt  
RNA2 NC\_011809 197 nt  
RNA3 NC\_011807 353 nt

### All sequences in the cluster

- 2 Asparagus virus 2 (NC\_011807 OK058519)
- 1 Surrounding non-legume associated ilarvirus (MN412730)
- 1 Hydrangea vein-banding virus (OK666837)

Accession number / CP stop and 3'-adjacent 6 nt / CP-frame translation of sequence from immediately after CP stop codon to next in-frame stop codon (\*), if present, or to end of available sequence

```
NC_011807 UGA CCACGC PRSGECVYLHSNECEKKNVIPFCHCECYDNACNTLWCPANVFCFHEP*
OK058519 UGA CCACGC PRSGECVYLHSNECEKKNVIPFCHCECYDNACNTLWCPANVFCFHEP*
MN412730 UGA CUACGC LRSDEKYLHSDECEKRDVIPFCHCECYDYACNTMWC PANESCYHEPNG*
OK666837 UGA CUACGC LRSVERKYLHSDECEKRDVIPFCHCECYDYACSTMWC PANESCYHEPNG*
```

## CLUSTER 15

### Alignment of 3'UTRs from the 3 segments of a representative genome

```

RNA3      UGACUAUCUGACAUGCCUCAAGUUAUGAGUUGCCUJACAUACAACUUGUUGUGUAAGA
RNA1      UAAUUUUUGAAA-----GAUGUUUCCUCUUUCUUGAUGCCUCUUUUAGAGGA
RNA2      UAAUU-----AGUGAUGCCUCUUUUUGAGAUGACC-----
          * * *                               **      ***      *      *

RNA3      UGCGGAUUJAAACCUCGACGAGUUGUJAGAUCAACUAGUCUGGAGUUGUACCUUCUGUUUG
RNA1      U---GACACAACUUUAGGCACGUUA-----CUUUG
RNA2      -----ACAGUUUGGCGUCAUG-----GUUCG
          *      * * *      *                               * * *

RNA3      UAUAACAGCGGGCUJAGUUUUCACGCUCUCUCGAUGUAAAUCUAAGAAUCCGUAUGUAA
RNA1      C-----UUCUGGUAACGUUAGUUUG-----
RNA2      C-----UUCUGCC-AUGUU--UCUG-----
          ***      * * *      * *

RNA3      ACCUCCGAAUCGGACGAUUUCCACGUGCAACGUGAGGCCUUUGGGCCGGGUUJACAAUGG
RNA1      -----UGGUUUUCCAGUAU
RNA2      -----UGUGUUUCUAGUAA
          *      ***      * *

RNA3      UUACCAAUGAGUUUUACACUAUUGAUGCCUCUUUUUAAAGAGAAG
RNA1      UAUCUAAUGAUAAU----ACUGAUGCCUUCUAUAAUAAAGAAGAUGC
RNA2      UAUCUAAUGAUAAU----ACUAAUGCCUUC--UUUAAAGAAGAUGC
          * * * * * * * * * * * * * * * * * * * * * *

```

```

RNA1 NC_040393 152 nt
RNA2 NC_040392 121 nt
RNA3 NC_040394 287 nt

```

### All sequences in the cluster

3 Cape gooseberry ilarvirus 1

Accession number / CP stop and 3'-adjacent 6 nt / CP-frame translation of sequence from immediately after CP stop codon to next in-frame stop codon (\*), if present, or to end of available sequence

```

MZ357177 UGA CUAUCU LSDMPQVNELPYITNCCVRCGFKPRRVVDQLVWSCTFCLYKQRA*
MZ357180 UGA CUAUCU LSDMPQVNELPYITNCCVRCGFKPRRVVDQLVWSCTFCLYKQRA*
NC_040394 UGA CUAUCU LSDMPQVNELPYITNCCVRCGFKPRRVVDQLVWSCTFCLYKQRA*

```

## CLUSTER 16

### Alignment of 3'UTRs from the 3 segments of a representative genome

```

RNA3      UGA CUACUUUCUGACCUCGACAAUGUCGAGUUGCCUCACAUGCGAUCUUCGUGUGUGAGA
RNA1      UGAC-----GCGAGGCGCAUUUGCGCGU
RNA2      UGAU-----
          ***

RNA3      UGCGGAUUCUGUCCCAAUAUGCUGUAGAUCAAGCUUAUUUGGAGAUGUCAUUUGUGUGGA
RNA1      UCCGACGAUUUCGUCGAAGACGUACUAAACAUGGUUGUUUAGUG-----CUGUAUGUA
RNA2      -----GAGUUUGCAGCGGAU-----GAUGGCGCUCGUACGUA
          *      *      *      *      *      *      *

RNA3      UAUCCACACAGUGCAUAGUUGCCUCGCAUCCGGGCGUGAAUCUAUGGUUUUCGUUUGAAC
RNA1      AUGUGAUUUGG-----GCAUCCGUACGUUUCUCUAACGGACUUCAC-----
RNA2      UCUCUACACGA-----GUUUCGCG-----
          *      *      *      *      *

RNA3      GGUUUUCCACUUGCAAAGUGGGGCCUUUAGGCCAACGUUCAUAAAUGCCGUAAUAAUUAU
RNA1      -AUUUUCCAUU-----AAUAUCU--AAUGAUUUAAUGAUGC
RNA2      -UU AUGCCACU-----AAUAUCU--AAUGAUUUAGUGAUGC
          * * * * *      * *      * * * * *

RNA3      AUAUAUAUAUUUAACGAUGCCUCCAAAGGAGAUGC
RNA1      CUCUAUAUAU-----AUAGAGAAGC
RNA2      CUCCUUA-----AUGGAGAUGC
          * *      *      * * * * *

```

```

RNA1 OL584348 171 nt
RNA2 OL584349 107 nt
RNA3 OL584350 277 nt

```

### All sequences in the cluster

3 Prunus virus I

Accession number / CP stop and 3'-adjacent 6 nt / CP-frame translation of sequence from immediately after CP stop codon to next in-frame stop codon (\*), if present, or to end of available sequence

```

OL472065  UGA CUACUU LLSDDLDDVELPHMRSSCVRCGFCPKYAVDQLIWRCHLCEYPHSA*
OL584350  UGA CUACUU LLSDLDNVELPHMRSSCVRCGFCPKYAVDQLIWRCHLCGYPHSA*
MW579755  UGA CUACUU LLTDLDNVELPHMRLSCVRCGFSPKYAVDQCIWRCHLCGYPHSA*

```



## CLUSTER 17a

### Alignment of 3'UTRs from the 3 segments of a representative genome

```
RNA1 -----
RNA3 UGA CUACACUCGGGCUUUUGUCCCGUGUGUGUUUAUGUACCACUUUGUCAUUGUAUGUC
RNA2 -----

RNA1 -----UAGAUCAA
RNA3 UACAAUUACUCAUGUGAUGUCAUUGGUUGUGAUGCCAAUGAUACCUUCUGUAUAGAA -GA
RNA2 -----UAAUU -UA
                      **      *

RNA1 UGUUUUCGUGUAACAUGCAUGUUACCUAGUGAAGGGUCCUCCGGGAUGUGCUCAGCACCU
RNA3 UGAUCAAGUGUAACAUAUUGUUACCUAGCGAAGGGUCCUCCGGGAUGUGCUCAGCACUC
RNA2 UUAACAAGUGUAACUUUCAUGUUACCUAGUGAAGGGUCCUCCGGGAUGUGCUCAGCACCU
      *          ***** * *****

RNA1 AGCCUUAGCCAAGUUCUAUAGCCCACCUUUGCUUGUCUCCGGGUGGAUGCCUCAUGGUGC
RNA3 AGCCUUAGCUAAGUUCUAUAGCCCACCUUUGC -UGUCUCCGGGUGGAUGCCUCAUGGUGC
RNA2 AGCCUAAGCCAAGUUCUAUAGCCCACCUUUGCUUGUCUCCGGGUGGAUGCCUCAUGGUGC
      ***** ** * *****

RNA1 UAUGAAUGCCUAUAAUUGAAAUUUUAUAGAUGCCUAUUUUUCCUCUCUUGAGGAAAUUA
RNA3 UAUGGAUGC-----
RNA2 UAUGGAUGCCUAUAACUGAAAUUUUAUAGAUGCCUAUUUUCUCUCUCUUGAGAGAAUUA
      ****  ****

RNA1 GAUGCCUCC -AAGGGAGAAGC
RNA3 -----
RNA2 GAUGCCUCCAAGGGAGAAGC
```

```
RNA1 NC_003833 208 nt
RNA2 NC_003834 208 nt
RNA3 NC_003835 247 nt (note, RNA3 sequence is 3'-truncated)
```

### All sequences in the cluster

- 1 Tulare apple mosaic virus (NC\_003835)
- 1 Rosa ilarvirus-1 (MT017863)

Accession number / CP stop and 3'-adjacent 6 nt / CP-frame translation of sequence from immediately after CP stop codon to next in-frame stop codon (\*), if present, or to end of available sequence

```
MT017863 UGA CUACAC LHSYG C S S C G Y V P Y C H C Q C F D G T C D V F G C V A N D T V F Y D E V *
NC_003835 UGA CUACAC LHSGF C P V C G Y V P L C H C M C Y N Y S C D V I G C D A N D T F C I E D D Q V *
```

## CLUSTER 17b

### Alignment of 3'UTRs from the 3 segments of a representative genome

```

RNA1      U-----
RNA2      UGA-----
RNA3      UGACCACGCUCGGGCUU AUGCCAGAGUUGUGGAUUU AUUCCAUAUUGUCAUUGUUAUUGU
          *

RNA1      -----AAGUG
RNA2      -----AAGUG
RNA3      UGCGAUGACGUAUGUGAUGUCAUUGGAUGUUUAGCCAAUGAUACCGUCUAUGACGAAGUG
          *****

RNA1      UAAC-UUUCAUGUUACCUAGUGAAGGGUCCUCCGGGAUGUGCUCAGCACCUAGCCUAAGC
RNA2      UAACAUUUCAUGUUACCUAGUGAAGGAUCCUCCGGGAUGUGCUCAGCACCUAGCCUAAGC
RNA3      UAAC-AUUCAUGUUACCUAGUGAAGGGUCCUCCGGGAUGUGCUCAGCACCUAGCCUAAGC
          *****

RNA1      UAAGUCCAUAUGCCCACCUUUGCUUACUCCGGGUGGAAGCCUAUACAAAUGCUAUGGAUG
RNA2      UAAGUCCAUAUGCCCACCUUUGC-UACUCCGGGUGGAAGCCUAUACAAAUGCUAUGGAUG
RNA3      UAAGUCCAUAUGCCCACCUUUGC-UACUCCGGGUGGAAGCCUAUACAAAUGCUAUGGAUG
          *****

RNA1      CCUAUAUUUGAAAUAUAUAGAUGCCUAAA-UUUUCUCUCAUUGAG-AAAAUUUAGAUGC
RNA2      CCUAUAUUUGAAAUAUAUAGAUGCCUAAA-UUUUCUCUCAUUGAG-AAAAUUUAGAUGC
RNA3      CCUAUAUUUGAAAUAUAUAGAUGCCUAAAUUUUUCUCUCAUUGGAGAAAAUUUAGAUGC
          *****

RNA1      CUCCCACGGAGAUGCAAUCGAAUUC
RNA2      CUCCAAAGGAGAUGC-----
RNA3      CUCCAAAGGAGAUGC-----
          **** * *****

```

```

RNA1 NC_039075 208 nt
RNA2 NC_039074 200 nt
RNA3 NC_039076 313 nt

```

### All sequences in the cluster

#### 1 Tomato necrotic streak virus

Accession number / CP stop and 3'-adjacent 6 nt / CP-frame translation of sequence from immediately after CP stop codon to next in-frame stop codon (\*), if present, or to end of available sequence

NC\_039076 UGA CCACGC PRSGLCQSCGFIPYCHCYCCDDVCDVIGCLANDTVYDEV\*

## CLUSTER 18

### Alignment of 3'UTRs from the 3 segments of a representative genome

```
RNA1 -----
RNA2 U-----
RNA3 UGACCACAAGAUUGUGAAUCUUGUGGUUAUAUCCAUCUGCCACUGUGAAUGUUGGCCG
```

```
RNA1 -----
RNA2 -----AGU
RNA3 UACAGAUGCACACCAUUGGGUGUAAUGCUAUGAUCUAUGGUUUUAUAGAUUCUUAAGU
```

```
RNA1 -----UGAGCUGAUGAAGGGUCCUCCGGGAUGUGCUCAGCACUUAACCUAAGUCA
RNA2 CUCACUUUCGUGAGCUGAUGAAGGGCCUCCGGGGUGUGCUCAGCACUUAACCUAAGUCA
RNA3 CUCACUUUCGUGAGCUGAUGAAGGGCCUCCGGGGUGUGCUCAGCACUUAACCUAAGUCA
*****
```

```
RNA1 AGUUCAUAUGCCCACCUUUGCUGCUCGGGUGGAUGCUUCGUGCAAUGCUAUGAAUGCC
RNA2 AGUUCAUAUGCCCACCUUUGCUGCUCGGGUGGAUGCCUCGUGCAAUGCUAUGAAUGCC
RNA3 AGUUCAUAUGCCCACCUUUGCUGCUCGGGUGGAUGCUUCGUGCAAUGCUAUGAAUGCC
*****
```

```
RNA1 UACGUGUACAAACGUAGAGCCUAUAUUUCUCUCCUGAGAAAAUAUAGAUGCCUCCAA
RNA2 UACGUGUAUAUGCGUAGAGCCUAUAUUUCUCUCUUGAGAAAAUAUAGAUGCCUCUAAA
RNA3 UACGUAUAUGCGUAGAGCCUAUAUUUCUCUCCUGAGAAAAUAUAGAUGCCUCCAAA
***** **
```

```
RNA1 GGAGAUGC
RNA2 GGAGAUGC
RNA3 GGAGAUGC
*****
```

```
RNA1 NC_003548 178 nt
RNA2 NC_003547 192 nt
RNA3 NC_003546 308 nt
```

### All sequences in the cluster

3 Citrus leaf rugose virus

Accession number / CP stop and 3'-adjacent 6 nt / CP-frame translation of sequence from immediately after CP stop codon to next in-frame stop codon (\*), if present, or to end of available sequence

```
NC_003546 UGA CCACAA PQDCESCGYIPYCHCECWPYRCYTIGCNANDLWFIDS*
JX256249 UGA CCACAA PQEESCXYIPYCHCECWPYRCYTIGCNANDLWFIDS*
MZ330102 UGA CCACAA PQDCESCGYIPYCHCECWPYRCYTIGCNANDLWFIDS*
```

## CLUSTER 19

### Alignment of 3'UTRs from the 3 segments of a representative genome

```
RNA2      UAGUGACCCCGUUUACUAGUCCAUUGGACUAAUGGAAAUCCC - AUUGGGUCGUUGACUU
RNA1      UGAUG-----UUACUAGUCGUUUAGACUAAUGAAAAUCCCAAUUGGGUCAUUGACUU
RNA3      -----UUACUAGUCGUUUAGACUAAUGGAAAUCCC - AUUGGGUCGUUGACGU
                *****
```

```
RNA2      UGUCAACGAGUUAACUACGAUGUCGGCCCUAGGACAUCUAUCGAGCUAACGACGAUCGCU
RNA1      UGUCAAUGAGUUAACUACGAUGUCGGCCCUAGGACAUCUAUCGAGUUAACGACGAUCGCU
RNA3      UGUCAACGAGUUAACUACGAUGUCGGCCCUAGGACAUCUAUCGAGUUAACGACGAUCGCU
                *****
```

```
RNA2      UUGCGAUUAUGCUUCAUUUUUCCUUUCGGGAAAAUGAAAUGACCCUUAGGGGCC
RNA1      UUGCGAUUAUGCUUCAUUUUUCCUUUCGGGAAAAUGAAAUGACCCUUAGGGGCC
RNA3      UUGCGAUUAUGCUUCAUUUUUCCUUUCGGGAAAAUGAAAUGACCCUUAGGGGCC
                *****
```

```
RNA1 NC_003451 166 nt
RNA2 NC_003452 173 nt
RNA3 NC_003453 143 nt
```

**Note:** No insert in RNA3, so no evidence for RT domain.

### All sequences in the cluster

3 American plum line pattern virus

Accession number / CP stop and 3'-adjacent 6 nt / CP-frame translation of sequence from immediately after CP stop codon to next in-frame stop codon (\*), if present, or to end of available sequence

```
KY883317 UAA UGAAAA *
NC_003453 UAA UGAAAA *
LC496471 UAA UGAAAA *
```

## CLUSTER 20

### Alignment of 3'UTRs from the 3 segments of a representative genome

```

RNA1      U-----
RNA2      U-----
RNA3      UGAAGGUCCCAAUCCUCACAUGAUGAGAUGCCGCACGUCAAGAACA AUUCUUGUGUGCGA
          *

RNA1      -----AAUUGUGUUUC-----
RNA2      -----
RNA3      UGUGGAUUCAGACCACCGCAGAUUAUAGAUAGUAUGUAUGGCGUUGCCGUAGAUGC UAU

RNA1      -----AGUUACUUUGU
RNA2      -----AAUUUAUUGA-
RNA3      CUAGAACAUGCCGCCUGAACCAUUGUUUCAAGGUUUCGCACUUGAUACAAAUUGUUUAA
          * * *

RNA1      AACUAUGCCUCCUUUGGAGAUGACACGUU - CACAUGGCGCUCACUCGCAUCUUCGGUGAG
RNA2      ---AUGCC-----AUUGAUUAUGAAGGCCACUCAGUCGCAUUUCAGCUGAG
RNA3      AUUU AUGCCUCCAUUGGAGAUGAUUGAUCAUGUAGGCCGUUUGGUUGCAUUCUUAACAAG
          * * * * * * * * * * * * * * * * * * * * * *

RNA1      UG-UGUUCGUGAUUCUAUCAAUACCJAAUUGGUUUUGAUAAUGCCUCUAUUUCUAGAGAU
RNA2      UGAUGAUCAUGUUACCAUUAUAUCUAA - AGAUUUUAUGAUGCCUCUAUUUCUAGAGAU
RNA3      CGUUGAUCAUGUUGCCAUUAUAUCUAA - UGAUUUAUGAUGCCUCUAUUUCUAGAGAU
          * * * * * * * * * * * * * * * * * * * * * * * * * * * * * * * * * *

RNA1      GC
RNA2      GC
RNA3      GC
          **
  
```

```

RNA1 OM323989 143 nt
RNA2 OM323990 115 nt
RNA3 OM323991 301 nt
  
```

### All sequences in the cluster

3 Bacopa chlorosis virus

Accession number / CP stop and 3'-adjacent 6 nt / CP-frame translation of sequence from immediately after CP stop codon to next in-frame stop codon (\*), if present, or to end of available sequence

```

JQ015298 UGA AGGUCC RSQSSHDEMPHVKNNSCVRCGFRPPQIIDQYVWRCRRCCYLEHAA*
OM323991 UGA AGGUCC RSQSSHDEMPHVKNNSCVRCGFRPPQIIDQYVWRCRRCCYLEHAA*
OM323992 UGA AGGUCC RSQSSHDEMPHVKNNSCVRCGFRPPQIIDQYVWRCRRCCYLEHAA*
  
```

Note the unusual 3' context for RT, but RNA3 does contain an insert relative to RNAs 2 and 3, and the downstream peptide contains a Zn-finger domain, suggesting that RT does occur.

## CLUSTER 21

### Alignment of 3'UTRs from the 3 segments of a representative genome

```
RNA1      UAGAUCGGAUUUGGUACCGAUCGAAAUGACCGGUCCUCCGUGAGGGUUUACCGGUCGCAU
RNA2      UAGGUUGGGUUUGGUACCAACCGGAAUGAUCGGUCCUCCGUGAGGAUUUACCGAUCGCAU
RNA3      UAGGUUGGGUUUGGUACCAACCGAAGUAUCGGUCCUCCGUGAGGAUUUACCGAUCGCAU
          *** * ** ***** * ** ***** ***** ***** ***** *****
```

```
RNA1      UCGAGAGUUCGCCUCCUAGGAAUCGACCUAAGAAUGCAAGUUACCUAAUAAGGUAAUAUU
RNA2      UCGAGAGUUCGCCUCCUAGGACUCGACCUAAGAA-----
RNA3      UCGAGAGUUCGCCUCCUAGGACUCGACCUAAGAAUGCAAGUUACCGAAUAGGUAAUAUU
          ***** *****
```

```
RNA1      CCAUGAAUCGUGAAGAUU-----
RNA2      -----
RNA3      CCAUGAAUCGUGAAGAUUCAUGAUGCCCCGCAGAACAG
```

RNA1 MW962369 138 nt  
RNA2 MW962372 94 nt  
RNA3 MW962375 158 nt

**Note:** No insert in RNA3, so no evidence for RT domain.

### All sequences in the cluster

3 Green Sichuan pepper ilarvirus

Accession number / CP stop and 3'-adjacent 6 nt / CP-frame translation of sequence from immediately after CP stop codon to next in-frame stop codon (\*), if present, or to end of available sequence

```
MW962377 UAG GUCGGG VGFGTDRIDRSSVRIYRLHSRVLLGLDLRMQVIEQDDIP*
MW962376 UAG GUUGGG VGFGTNRNDRSSVRIYRSHSRVLLGLDLRMQVTE*
MW962375 UAG GUUGGG VGFGTNRNDRSSVRIYRSHSRVLLGLDLRMQVTE*
```

## CLUSTER 22

### Alignment of 3'UTRs from the 3 segments of a representative genome

```
RNA1      UAGUGACUCUACAUGAGUCCUAGUGAAGGAUCCUCCGGGAUGUGCUCAGCACCUAGCCUA
RNA3      ---UGACUCUACAUGAGUCCUAGUGAAGGAUCCUCCGGGAUGUGCUCAGCACCUAGCCUA
RNA2      -----UGAGUCCUAGUGAAGGAUCCUCCGGGAUGUGCUCAGCACCUAGCCUA
          *****
```

```
RNA1      AGCUAAGUUCAUUAUGCCACCUAUGCUGCUCGGGUGGAUGCUUUAUUUGUUUAUGAAUGC
RNA3      AGCUAAAGUUCAUUAUGCCACCUAUGCUGCUCGGGUGGAUGUUUUAUUUGUUUAUGAAUGC
RNA2      AGCUAAGUUCAUUAUGCCACCUAUGCUGCUCGGGUGGAUGUUUUAUUUGUUUAUGAAUGC
          *****
```

```
RNA1      CUAUGAUUGAAAUAUCAUAGAUGCCUAAAUUUUUCUCUCUUGAGAAAAUUUAGAUGCCU
RNA3      CUAUGAUUGAAAUAUCAUAGAUGCCUAAAUUUUUCUCUCUUGAGAAAAUUUAGAUGCCU
RNA2      CUAUGAUUGAAAUAUCAUAGAUGCCUAAAUUUUUCUCUCUUGAGAAAAUUUAGAUGCCU
          *****
```

```
RNA1      CCUAGGAGACGC
RNA3      CCAAGGAGACGC
RNA2      CCUAGGAGACGC
          ** *****
```

```
RNA1 ON932434 192 nt
RNA2 ON932435 179 nt
RNA3 ON932436 189 nt
```

**Note:** No insert in RNA3, so no evidence for RT domain.

### All sequences in the cluster

- 1 Blacklegged tick associated ilarvirus (MG647776)
- 1 Apple ilarvirus 2 (ON932436)

Accession number / CP stop and 3'-adjacent 6 nt / CP-frame translation of sequence from immediately after CP stop codon to next in-frame stop codon (\*), if present, or to end of available sequence

```
MG647776  UGA CUCUAC LYMSPSEGSSGMCSAPSL*
ON932436  UGA CUCUAC LYMSPSEGSSGMCSAPSL*
```

Note the somewhat leaky stop codon context (UGA CU), but no insert in RNA3 relative to RNAs 1 and 2, and no Zn-finger in the downstream peptide.

## CLUSTER 23

### Alignment of 3'UTRs from the 3 segments of a representative genome

```
RNA1      UAGUU-----
RNA2      UGAG-----
RNA3      UGACUAUAUGAUCCAUUCUUGAUUGUCCGACAGUGCUAACUUUUCAUUUCUCCACCG
          *

RNA1      -----UUGUGUCCAG
RNA2      -----CUUUACCUAG
RNA3      GAAGAAAUGGAAUUUAAAAGCCUGGCGAUGCUGUUUUAUUGCAAUGAAAUUCAUUUGUCUAG
          * * * **

RNA1      AUUUUGUCUCUGGAUGGUUUAAAUCCUUUUGGUUAACUUUGUACUAAGUACAUGAAAGUU
RNA2      AUUUUGUCUCUAGAUGA-AUAAAUCCUUUUGGUUAACUUCGUACUUUGUACAUGGAAGUU
RNA3      AUUUUGUCUCUAGAUGA-AUAAAUCCUUUUGGUUAACUUCGUACUUUGUACAUGGAAGUU
          ***** ** * *****

RNA1      AAGAU AAGAAUGCCUACUGUUUCCUAAGUGGA-----
RNA2      AAGAUAAAAAUGCCUACUGUUUCCUAAGUGGAUGACACUUUUUAAUACCUACAUUUGUAG
RNA3      AAGAUAAAAAUGCCUACUGUUUCCUAAGUGGAUGACACUUUUUAAUUGCCUACAUUUGUAG
          ***** **

RNA1      -----
RNA2      AUGCCCUUACCGUGAGGUAAGGAUGCCCUUUUGGGAAGC
RNA3      AUGCCCUUACCGUGAGGUAAGGAUGCCCUUUUGGGAAGC
```

RNA1 KX196166 107 nt  
RNA2 KX196165 173 nt  
RNA3 KX196164 279 nt

### All sequences in the cluster

2 Viola white distortion associated virus

Accession number / CP stop and 3'-adjacent 6 nt / CP-frame translation of sequence from immediately after CP stop codon to next in-frame stop codon (\*), if present, or to end of available sequence

GU168941 UGA CUAUAU LYDPFFDCSDSANISFLPPEEMEFKAWRCCYCNEIHV\*  
KX196164 UGA CUAUAU LYDPFFDCSDSANFSFLPPEEMEFKAWRCCYCNEIHV\*



## CLUSTER 24

### Alignment of 3'UTRs from the 3 segments of a representative genome

```

RNA3      UAA AUC UAG CAUUGUUUUAUCCAACCAUCUUGCUGGUUGAUGAAUAGUCCGGUCUUGCACC
RNA2      UGACUUGUGUC-UCUUGUCCCGGCU- - - -UUUAGCCGAUGACUGGUCCGGUUUUGCACC
RNA1      UGAAUUAAAUCAGCAUGUCCCAACCA- - -AUAGGUUGAUGACUAGUCCGGUCUUGCACC
          * * *           * * * * *           * * * * * * * * * * * * * * * *
  
```

```

RNA3      CGGAUGAGAUUAAAUCCAUAUGGUUCGACUCUCUCAGAGGUUUAAGUCGAAGACAUAUAU
RNA2      CGGAUGAGAUUAAAUCCAUAUGGUUCGACUCUCUCAGAGGUUUAAGUCGAAGACAUCUAU
RNA1      CGGAUGAGAUUAAAUCCAUAUGGUUCGACUCUCUCAGAGGUUUAAGUCGAAGACAUCUAU
          * * * * * * * * * * * * * * * * * * * * * * * * * * * * * * * * * *
  
```

```

RNA3      GCCUAUUGCCCCUGUAGGAGUGCACUAGAUGUUGCGUGAAGAUUUUCUUCAUUUUGCCC
RNA2      GCCUAUUGCCCCUGUAGGAGUGCACUAGAUGUUGCGUGAAGAUUUUCUUCAUUUUGCCC
RNA1      GCCUAUUGCCCCUGUAGGAGUGCAUAGAUGUUGCGUGAAGAUUUUCUUCAUUUUGCCC
          * * * * * * * * * * * * * * * * * * * * * * * * * * * * * * * * * *
  
```

```

RNA3      UACCAAAGGUAGGAUGCCCCUUUAAGGGAGGC
RNA2      UACCAAAGGUAGGAUGCCCCUUUAAGGGAGGC
RNA1      UACCAAAGGUAGGAUGCCCCUUUAAGGGAGGC
          * * * * * * * * * * * * * * * * * * * * * * * * * * * * * * * * * *
  
```

RNA1 NC\_006064 209 nt  
 RNA2 NC\_006065 207 nt  
 RNA3 NC\_006066 213 nt

**Note:** No insert in RNA3, so no evidence for RT domain.

### All sequences in the cluster

1 *Humulus japonicus* latent virus

Accession number / CP stop and 3'-adjacent 6 nt / CP-frame translation of sequence from immediately after CP stop codon to next in-frame stop codon (\*), if present, or to end of available sequence

NC\_006066 UAA AUCUAG I\*

## CLUSTER 25

### Alignment of 3'UTRs from the 3 segments of a representative genome

```

RNA3      UGAAGGUCAACCUCCUCAGGGAGUGAGUUGCCGUGCAUUAUGAAUAAUUAUGUGCACGA
RNA1      -----
RNA2      -----

RNA3      UGCGGUUUUJAGGCCUCCGU AUGUUAUUGAUCAAUACAU AUGGUCGUGUCUUUAUGCCAU
RNA1      -----UAAUU AUGUUUAGCUUUUGGCUAUUUUCCGU
RNA2      -----UAA-----UUUAGCUGUUG-----UUUCCGU
                      * * * * * * * * * *

RNA3      UAUAAGCAUUAUGCCUAAACCAAGAAGCAAUUUCUUGCUUU AUGUACCAAUUUUUGA
RNA1      U-----UUA--CGA
RNA2      U-----UUAUACGA
                      * * * * *

RNA3      UGCCUCGCUJACGCGAGAAGUCCAUCAAU-AGGCGAUUJAGUUGCAUUCUGACUAAAU
RNA1      UGCCUCGAUUUAUCGAGAAGAAUCAUUCAGGUUGGCACUUUAGACGCAUUCUAUCUAAAG
RNA2      UGCCUCGGUUUACCGAGAAGAGUCAAUCAAUUAAGGCGCUUAGACGCAUUCUAUCUAAAG
***** ** ***** ***** ** ***** ***** *****

RNA3      UUGAUUUGGAAAGUUUCCACUGAU AUCUAAUGAU AUCAGUGAUGCCUCU AUUUUCUAGAGA
RNA1      CUGAUU---GAUUUCCA UJAAUAUCUAAUGAUUUAUGAUGCCUCCA UJ---UGGAGA
RNA2      UUGAUU---GAUUUCCA UJAAUAUCUAAUGAUUUAUGAUGCCUCCA UJ---UGGAGA
***** * ***** * ***** * ***** * ***** * *****

RNA3      UGC
RNA1      UGC
RNA2      UGC
***

```

```

RNA1 OL539723 155 nt
RNA2 OL539724 147 nt
RNA3 OL539725 302 nt

```

### All sequences in the cluster

#### 1 Soybean ilarvirus I

Accession number / CP stop and 3'-adjacent 6 nt / CP-frame translation of sequence from immediately after CP stop codon to next in-frame stop codon (\*), if present, or to end of available sequence

OL539725 UGA AGGUCA RSTSSGSELP C I M N S C A R C G F R P P Y V I D Q Y I W S C A L C H Y K H Y A \*

Note the unusual 3' context for RT, but RNA3 does contain an insert relative to RNAs 2 and 3, and the downstream peptide contains a Zn-finger domain, suggesting that RT does occur.

## CLUSTER 26

Unable to generate alignment of 3'UTRs from RNAs 1, 2 and 3 since the only available sequences are MN386958.1 (RNA3) and MN386957.1 (partial RNA2 without 3'UTR).

### All sequences in the cluster

1 Apple ilarvirus 1

Accession number / CP stop and 3'-adjacent 6 nt / CP-frame translation of sequence from immediately after CP stop codon to next in-frame stop codon (\*), if present, or to end of available sequence

MN386958 UGA AUCGCG IAEFRPCDDARTGAECSDDES~~LD~~STVVHDYSDDDFYYS~~DVY~~QFDDRI\*

## CLUSTER 27

### Alignment of 3'UTRs from the 3 segments of a representative genome

```
RNA3      UGACUACACUCGGGUGGAGUAAAUUUCGAUACCUUGAACGGAAUUUGUCCAGAUGC GGG
RNA1      -UAAUACUUUCGGAAGUA-----AUUCCGAAAUGAAAAUC-UUCCA-----
RNA2      -----UGAAAAUC-UUCCA-----
                                     * * * * *

RNA3      UUUAAACCCAAGCGGUUAGUAGAUAUUAUACAUACACUUGCCGUGAAUUGCGGAAAGAU
RNA1      -----CUGAAUAUUCAGUGAAGU-
RNA2      -----CUGAAAAUUCAGUGAAGU-
                                     * * * * *

RNA3      UACUUCGCAUAAAUUCUUGAUAAUUCAGUUAAGUCUCACUAGUGAAUAAGACUUAAGA
RNA1      -----UUGGGUCUCAUGGAG--AUUUAACCCAAAGA
RNA2      -----UUGGGUCUCAUGGAG--AUUUAACCCAAAGA
                                     ** * * * * *

RNA3      CACAUAUCCCAUCUAUCGCUCCUGAGAUGAUUGAUUGUGUUGCCUAAAGAACGUUAUUA
RNA1      AACUUAUGCCUUUCGCCAUACCGAAG-----GAUGAAUUUUAAGU
RNA2      AACUCAUGCCUUUCGCCAC-ACCGAAG-----GAUGAAUUCUGAGU
                                     ** * * * *

RNA3      CUUGACUGGUAACGAUUUUCUAUAGAUGCUCACUGUUUUAUUAUAAAACAGU--GAAUGCC
RNA1      UUCGAGUGAU--CGA-----AUAUACGAUCAUUUCCUAAUCAAAACGAUJAGGAUGCC
RNA2      UUCAAGUGAU--CGA-----AUAUACGAUCAUUUCCUAAUCAAAUGAUJAGGAUGCC
                                     * * * * *

RNA3      CCCAUUGGGA-AGC
RNA1      ACCAAGGUGAUGGC
RNA2      ACCAAGGUGAUGGC
                                     *** * ** **
```

RNA1 MZ170696 194 nt  
RNA2 MZ170697 166 nt  
RNA3 MZ170698 311 nt

### All sequences in the cluster

#### 1 Water chestnut virus A

Accession number / CP stop and 3'-adjacent 6 nt / CP-frame translation of sequence from immediately after CP stop codon to next in-frame stop codon (\*), if present, or to end of available sequence

MZ170698 UGA CUACAC LHSGGVNFDTWNGI **C**SR**C**GFKPKRLVDQYTY**T**CR**E****C**GKIYFA\*

## CLUSTER 28

### Alignment of 3'UTRs from the 3 segments of a representative genome

```
RNA3      UGA GAACCGAAUGGUUCUCGGUUGUCCGAU UAGGACAUUCCCAUUUUGGGGAUAGAAGA
RNA1      UGAUUA - - GGAUCAUUUG - - - - AUCCGAAUUUGA - - - - CUCGAUUUAGAGUCUUGAAAC
RNA2      UGAGUCCC - - - - CUUUGUUGCUCUUUGAGCAUGA - - - - CUCGAUUUAGAGUCUUGAAGC
          ***                **                *  **      **      * * * * * * * * * *

RNA3      GAUUGAUCACUCUUCG - AAUUUCCACGAAU - GUGAAGUGCCGUGCCCUUGGGACAAAAC
RNA1      GAUUGAUCACGUUUCGAAAUUCCACGUUUAGUGAAGUACCGUGCCCUUGGGAACAAAC
RNA2      GAUUGAUCACGCUUCGAAAUUCCACGUUUAGUGAAGUACCGUGCCCUUGGGAACAAAC
          ***** ** * ***** * ***** *****

RNA3      GGCAGCGAAAGAUAGGUUUGCGUUCCTAAACCGGCGAUCAC - UUUUGCAACAAAUUCGAA
RNA1      GGUAGUGAAAUGAAGGUUUGCGUUCCTAAACCGACGAUCACAUUUUGCAACAAAUUCGAU
RNA2      GGUAGCGAGAUGAAGGUUUGCGUUCCTAAACCGACGAUCACAUUUUGCAACAAAUUCGAU
          * * * * * ***** ***** *****

RNA3      UGAAUUUGAUUCCACACCCGUGAAGGGUAUGGAUGCUCGUAAGGAUCCCGGGAUUCG
RNA1      AGAAUUUGAUUCCACACCCGAGAAGGAUUAUGAUGCCUGUGAGGCUAACA - - - - -
RNA2      AGAAUUUGAUUCCACACCCGUGAAGGGUAUAGAUGCUCGUAAGGAACGGA - - - - UCC
          ***** ***** ** * ***** * * * * *

RNA3      G
RNA1      -
RNA2      C
```

RNA1 KU947034 221 nt  
RNA2 KU947033 227 nt  
RNA3 KU947035 238 nt

**Note:** No insert in RNA3, so no evidence for RT domain.

### All sequences in the cluster

1 Lilac leaf chlorosis virus

Accession number / CP stop and 3'-adjacent 6 nt / CP-frame translation of sequence from immediately after CP stop codon to next in-frame stop codon (\*), if present, or to end of available sequence

KU947035 UGA GAACCG EPNGSRLSD\*

Note that lilac leaf chlorosis virus also occurs as single-sequence cluster 31. This is because the two sequences, NC\_025481 and KU947035, have only 70.6% amino acid identity to each other so were split into separate clusters as a result of the 80% amino acid identity used in BLASTCLUST.

## CLUSTER 29

### Alignment of 3'UTRs from the 3 segments of a representative genome

```
RNA3      UGACUAGAUGGUCUAGUCACUCCGGACGUGUGUCCGAUUUGCCUCACAUAGAUGGAAAU
RNA1      -----UGAACUAGUAAUUAGGCAUCGUA-GUCGUUUCUUUUCUACGUUUAC-----
RNA2      -----UAGAUUGGCAGCU---GAACGCA-UUCUAUUCAGUCCUA--UUGAU-----
              *   * *   *   *   *   *   *   *   *   *   *
RNA3      UCCUGUGUGAGAUGUGGAUAUGCUCGCCGUUACAUUGUAGAUCAAUGUUUJAUUGGGAAUGC
RNA1      -----UAGUUUCCAUCAC-----UGACUAAUGUCGGUGAUGAUGC
RNA2      -----UUUCCGUUAA-----UAUCUAAUGAUUUAACGAUGC
              *   * *   *   *   *   *   *   *   *   *   *
RNA3      ACUCUUUGUUCGUAUGAACACGGGCGUAGCAACCUCGCAUCCGGGUUUJAGACUACGUA
RNA1      -----
RNA2      -----
RNA3      UUCUACUAAUUAUUAAUUCUJAAUAAUAGUAUUGCCUCCAAAGGAGAUGC
RNA1      -----CUCUUUAAAAU-----AAAGAGAUGC
RNA2      -----CUCCC---AU-----AAAGAGAUGC
              **   **   **   **   **   **   **   **   **   **   **
```

RNA1 NC\_027928 101 nt  
RNA2 NC\_027929 90 nt  
RNA3 NC\_027930 230 nt

### All sequences in the cluster

#### 1 Privet ringspot virus

Accession number / CP stop and 3'-adjacent 6 nt / CP-frame translation of sequence from immediately after CP stop codon to next in-frame stop codon (\*), if present, or to end of available sequence

NC\_027930 UGA CUAGAU LDGLVTSGRVSDLPIDGNSCVRCGYAPRYIVDQCYWECTLC<sup>\*</sup>SYEQRA<sup>\*</sup>

## CLUSTER 30

### Alignment of 3'UTRs from the 3 segments of a representative genome

```

RNA3      UGACUCACUGCUGAUUCUUCAUCAACUGUUGUUGAUGAAUUGCCUCACAUGGAUGGUAUU
RNA1      -----UAGAGAGUUUCUUUCACU-UUAGUGAUG-----
RNA2      -----UGAUG-----
                                *****
  
```

```

RNA3      UCCUGUGUGAGAUGCGGAUUUJACACCGAAACGUAUUGUAGAUCAAUACGUAUGGC GAUGU
RNA1      CCCC UUAUGGGAAGACGGU----- UAUUGUUACCG
RNA2      CCUCUU AUGAGAUGAG----- UCU
                   * * ** ** *
  
```

```

RNA3      UACCUUUGUGAUUAUCCACAAAUGGCUUAGUUUCCCGCUCUCGAUUAUUUUAAGAGU
RNA1      UAAAUACGUGAUGG-----CGCACUCGACGCUUCUUAACGAGU
RNA2      UAGAUGUGGCU-----CUCCCGCGCUU-----CUUGGGAGU
                   ** * * * *                *** **                ****
  
```

```

RNA3      CCGCAGUAAACUCCGAAUCGGACGAUCCACGUGCAACGUGAGACCUUUGGGUCGAGUU
RNA1      GUCACGUAUUUUUCCAA-----AGAA
RNA2      AUUCUAAGAUUUUCCGAU-----AAUA
                       ** * * *
  
```

```

RNA3      UACAAGGGUUUCCAUUGGUGUAUAACACCAUUGAUGCC-UCUUAUAAG-AGAAGC
RNA1      AACUAAGUUUU-----CUUUGAUGCCUUCUUAUAAAGAAGAAGC
RNA2      UAUAUUUAUAU-----UAUCGAUGCCUUCUUAUAAAGAAGAAGC
                   * * * * * * * * * * * * * * * *
  
```

RNA1 NC\_022127 156 nt  
 RNA2 NC\_022128 116 nt  
 RNA3 NC\_022129 295 nt

### All sequences in the cluster

#### 1 Ageratum latent virus 1998

Accession number / CP stop and 3'-adjacent 6 nt / CP-frame translation of sequence from immediately after CP stop codon to next in-frame stop codon (\*), if present, or to end of available sequence

NC\_022129 UGA CUCACU LTADSSSTVVDLPHMDGNS[VRC]GFTPKRIVDQYVWRC[YLCD]YPQMA\*

## CLUSTER 31

### Alignment of 3'UTRs from the 3 segments of a representative genome

```
RNA3      -----UAGGUAUGAAUUGACCUCUACCGAAGUACCGCCGAU-GGCG
RNA1      UGA----UUUGAAGUGCUGGGUUUUAGUUGACCAGAAAACCGAAUACCACCGAAUAGGUG
RNA2      UGAAAACUUGUGUUUUCUAGGACCGAUUUGAUCACGGUCCGA--UACCACCGAUUAGGUG
              *  *  *      *  *  *  *  *      *      *  *  *  *  *  *  *

RNA3      AUGGACCC-UUCCCCGAAUGGGAAGAAAGGGUCGUACAACUJAGAAAGAGCGUUCCUCU
RNA1      AUGUACCCUUUCCCCGUUAGGGAGGUGUGGGUAGUGUAACAAAGGAAUAGCGUCCCAUU
RNA2      AUGUACCCUUUCCCCGUUAGGGAGGUGUGGGUAGUGUGACAAAGGAAUAGCGUCCCAUU
              ***  ***  *****      ***** *      ***** **      **  *  *  *****  *

RNA3      UUCGAAGGUCAAGUUGUGCAACAGAGACGAAUAAGAUCUCUGAUUCCUUAUACCGUGAAG
RNA1      UCCGAUGGUCUUGUUUUGCAACA-ACACGAAUGUG---UUGAUUCCUUAUACCGAGAAG
RNA2      UCCGAUGAUCUUGUCUCGCAACA-ACACGAAAGUG---UUGAUUCCUUAUACCGAGAAG
              *  *  *  *  *  *  *      ***** *  ***** *      ***** ***** *****

RNA3      GAUUAJAGAUGCUCCGUJAGGAUCCCGGAAUUCGG
RNA1      GAUUAJAGAUGC-CCUUJAGGAACC-----
RNA2      GAUUAJAGAUGCUCCGUJAGGAAC---GGAUCCC--
              ***** ***** *  ***** *
```

```
RNA1 NC_025477 194 nt
RNA2 NC_025478 203 nt
RNA3 NC_025481 196 nt
```

**Note:** No insert in RNA3, so no evidence for RT domain.

### All sequences in the cluster

1 Lilac leaf chlorosis virus

Accession number / CP stop and 3'-adjacent 6 nt / CP-frame translation of sequence from immediately after CP stop codon to next in-frame stop codon (\*), if present, or to end of available sequence

NC\_025481 UAG GUAUGA V\*

Note that lilac leaf chlorosis virus also occurs as single-sequence cluster 28. This is because the two sequences, NC\_025481 and KU947035, have only 70.6% amino acid identity to each other so were split into separate clusters as a result of the 80% amino acid identity used in BLASTCLUST.



## CLUSTER 32

Unable to generate alignment of 3'UTRs from RNAs 1, 2 and 3 since the only available sequences are JN107637.1 (RNA1, partial sequence without 3'UTR), JN107638.1 (RNA2, partial sequence without 3'UTR) and JN107639.1 (RNA3).

### All sequences in the cluster

1 Raphanus latent virus

Accession number / CP stop and 3'-adjacent 6 nt / CP-frame translation of sequence from immediately after CP stop codon to next in-frame stop codon (\*), if present, or to end of available sequence

JN107639 UGA CUAUUU LFSQLSNLVDATYSDDSVSDPEN

## CLUSTER 33

### Alignment of 3'UTRs from the 3 segments of a representative genome

```

RNA3      UGACCACGCUCGGGGUGUGAAUCGUGUGGUUAUGUACCAUUAUGCCAUUGUAAAUGCUAC
RNA1      -----UAAUUUGCAAUGUU-----UAAACAUUUC
RNA2      -----UAAACG-----
                                     ****

RNA3      AAUGAUGCCUGCUCAGUGGUUGGUUGUGAGCAGAAUAUCUGGUUUUAJACCAGAUGAAGUG
RNA1      -----AUGGAACG
RNA2      -----

RNA3      UUUCCAUAGGAACCUUAUCAGACGUCUUCAGGGAUGUACUAAGUACCUCGGUCUGAUGAA
RNA1      ACUAAAUG-----CCUCUUGGGUGUACUUAAGUA-CUUAAUUUJAGUCGA
RNA2      -----CUCCCGGAGUGUACUUAAGUA-CGAAGUUUAAACAA
                                     * * * * * * * * * * * * * * *

RNA3      AUCUAUAUGCCUAGUCGCCUCUACAACUAGA-GUCCUCUAUAGAUGCCCAUACUGUAAU
RNA1      AUCUAUAUGCCCAGCCGCCUCUACAGCUGGAUGACCUCUAUAGAUGCCUCUUAUUAUU
RNA2      AUCUAUAUGCCCAGCCGCCUCUACAGCUGGAUGUCCUCUAUAGAUGCCUCUUGUGUUAAC
***** * * * * * * * * * * * * * * * * * * * * * * * * * * *

RNA3      GUUUGGGGAUGCCAAAUCUCUCUCUCUUGAGAGAGAUUUGAUGCCUACCUUUGGUAGAGGC
RNA1      AUGAGAGAUGCCAAGUUUC-CUUUCCGAAGAGAAACUUGAUGCCUACCUACGGUAGAGGC
RNA2      AUAAGAGAUGCCAAGUUUC-CUUUCCGAAGAGAAACUUGAUGCCUACCUACGGUAGAGGC
* * * * * * * * * * * * * * * * * * * * * * * * * * * * * * *

RNA3      GAC--
RNA1      -----
RNA2      GGCUG

```

```

RNA1 OL472057 193 nt
RNA2 OL472058 164 nt
RNA3 OL472059 302 nt

```

### All sequences in the cluster

1 Tomato ilarvirus 1

Accession number / CP stop and 3'-adjacent 6 nt / CP-frame translation of sequence from immediately after CP stop codon to next in-frame stop codon (\*), if present, or to end of available sequence

OL472059 UGA CCACGC PRSGCESCGYVPYCHCKCYNDACSVVGC EQNIWFIPDEVFP\*

## CLUSTER 34

### Alignment of 3'UTRs from the 3 segments of a representative genome

```

RNA2      UAGU-----CUGAU-----UCUCCGAAAUGCUCAGCAGU--
RNA1      UAAC-----UCAAU-----AGUCCCAGGACAGUCUCAGACGU--
RNA3      UGACCACACUCGGGGGUCGAUGUUUGGUUUGCGAAGUCUCUUGGGGCUUGCAAACGUAU
          *                               ** * * * * ** **

RNA2      -----UCGG-
RNA1      -----UGUUGA-
RNA3      ACUCGAAUCGACGACUUUAGUCUUCGAGACGAAUGCCUGUAUUGUGGAGCAGAUGCUGAA
          *

RNA2      -----AUUA-----
RNA1      -----GUUAAU-----
RNA3      AUCGGACUGUUAUGUCCGUCUUUCAAAUGCCUCAGGGGUGCACUCAGUCCUUUGAUUU
          ***

RNA2      --ACGAGUUUAUGUUCCAAUCGUUUGUUUCUCCGAUUGAUGCCUAUUGGUGUUAUAAA
RNA1      -----UCUAUAUACCCACUGUAUGUUUCUCCAGUGGAUGCCUAUUUAAGGUGUUUAU
RNA3      GGAUGAGUUUAUAUUCGUCGUAUGUUUCUCCGAACGAUGCCUA--UAUGGUGUUUAU
          * ** * * * * ** * * * * * * * * * * * * * * * *

RNA2      AAAAAAAAAAUGUAC-AAUGUCAUGUG--CUACGCUUAUUUACGUGAGCU---UCAUCA
RNA1      AGAAGAUUAUGUGCAAGUCACAUAAAGUCCUUAUCUCUCUCUCAGGAGAGGAGAUAG--
RNA3      AGACGUGCAUGCAUUUAU-GUAUGUGUACCUAAUCUCUCUCUCAGGAGAGGAGAUUAGAA
          * * * * * * * * * * * * * * * * * * * * * *

RNA2      CUUGAAUCAGUAUCAAUUCGUAGUGAAUGGAAUAUACACC-----
RNA1      -----AUGCCUCUAAGGAG-----
RNA3      AAAAAAAAAAGCAGAGAAAGUGUUAGAUGGAGUAUAUAACAAGAAGAAUAACUAUUGUA
          * * * * * * * * * *

RNA2      AU---
RNA1      AUGC-
RNA3      AUACG
          **
  
```

```

RNA1 OL964100 173 nt
RNA2 OL964099 190 nt
RNA3 OL964098 362 nt
  
```

### All sequences in the cluster

#### 1 Carpotroche-associated ilarvirus

Accession number / CP stop and 3'-adjacent 6 nt / CP-frame translation of sequence from immediately after CP stop codon to next in-frame stop codon (\*), if present, or to end of available sequence

```

OL964098  UGA CCACAC PHSGRCLVCEVSWGLQTYTRIDDFSLRDECLYCGADAEIGLLCPSFKCPQGCTQCL*
  
```

## CLUSTER 35

### Alignment of 3'UTRs from the 3 segments of a representative genome

```
RNA2      UAAUCAUAAU-----
RNA1      UAGCU-----
RNA3      UGACCACACUCGGGGAGUCGUUGUCUUGUUUGGGACCUCUUGGUCUCUGCAGACUUAU
          *

RNA2      -----
RNA1      -----
RNA3      ACUUAUCUUGAAGAUUUUUCUCUCCGAGAUCAAUGCCUGCUAUGUGGAGCAGAUGCUGAA

RNA2      -----GUGUUUAUCCAUAUCAAAGACCCUCUUGGGCGCACUCAGUG-CUUAACUUU
RNA1      -----CCUCCGGGGU-CACUCAGUG---UUAGUUA
RNA3      AUCGGACUGAUUUGUCCGUCAUUAUAAUGCCUCUGGGGUGUACUCAGUACCCUUGUUU
          ***** ** ***** * **

RNA2      GGAUGA-GUUUGUAUUCGACUGUUUGUUUCUCCAGUCGAUGCCUGUAGGCGUUUACAG
RNA1      AGAUGAUGUUUGUUUCCGACUGUUUGUUUCUCCAGUCGAUGCCUGUUGGUGUUUACAG
RNA3      GGAUGA-GUUUGUAUUCGACUGUUUGUUUCUCCAGUCGAUGCCUGUUGGUGUUUACAG
          ***** *****

RNA2      ACGAGUACGGUUUUUACCGUAUGUCCUAUUCUCUCUCUCAGGAGAGGAGAAUAGAUGCC
RNA1      ACGAGUAUGUUUUGACCAUAUGUCCUAUUCUCUCUCUCAGGAGAGGAGAAUAGAUGCC
RNA3      ACGAGUAUGGUUUUGACCAUAUGUCCUAUUCUCUCUCUCAGGAGAGGAGAAUAGAUGCC
          ***** ** ** ** *****

RNA2      UCCAAAGGAGUCGC
RNA1      UCCAAAGGAGUCGC
RNA3      UCCAAAGGAGUCGC
          *****
```

RNA1 EU919668 166 nt  
RNA2 NC\_038777 193 nt  
RNA3 NC\_038776 313 nt

### All sequences in the cluster

1 Lilac ring mottle virus

Accession number / CP stop and 3'-adjacent 6 nt / CP-frame translation of sequence from immediately after CP stop codon to next in-frame stop codon (\*), if present, or to end of available sequence

NC\_038776 UGA CCACAC PHSGRCLVCGTWSLSLQTYTYLEDFSLRDECLLGGADAEIGLICPSFKCPLGCTQYPCFG\*

## CLUSTER 36

### Alignment of 3'UTRs from the 3 segments of a representative genome

```
RNA2      UAAUUGAUCGA-----AUUCCUCACUU-----
RNA1      UGAAGGGACCAUAUGGUCCAUACCGCUUGC GCGAUGCCCUAACGGGAUG-----
RNA3      UGA AAGGUUGCUGCCUCGGGUGUAGUCCCGAGAUGCCACACGUGGAUGGAAAUUCCUGC
          * * *                               * * * *
RNA2      -----AUG
RNA1      -----AUG
RNA3      GUGCGAUGCGGAUAUACACCCAAAUUUUGAUAGAUUCAUUAUUUGGACGUGUUUCAUG
          ***
RNA2      UGAGAAGACUAUCAAGAUAGGCUAUCUCUACGCUUCUUUUG-GAGAUACUUGAUUGUUU
RNA1      UGAUGAGAUG-----GCAAUCUCGACGCUUCU--AACGAGAUGCUCAUCAUUUAC
RNA3      UGCUCAUAUGAGCAAUAUGCAUAGUUGUCACGCUUCUUGACGUAUUUCUAUGUAUUCGC
          ** * * * * * * * * * * * * * * * * * * * * * *
RNA2      CCAGUGUUAUUUAUU-----UAAUAACAC-----UG
RNA1      CAA-----CAUUAUCAAA---UGAUAAUGU-----UG
RNA3      AUACAAGUUUCCUUCGCAAACUUGUAAUGAUGCCAUUAGUGUAUAUAUACACUAUG
          * * * * * * * * * * * * * * * * *
RNA2      AUGCCUCCAUGUGGAAGAAGC
RNA1      AUGCCUCCUAAUGGAAGAAGC
RNA3      AUGCCUCCUAA--GGAGAAGC
          * * * * * * * * * * * * * * * * *
```

RNA1 MG800789 147 nt  
RNA2 MG800790 132 nt  
RNA3 MG800791 260 nt

### All sequences in the cluster

1 Peanut virus C

Accession number / CP stop and 3'-adjacent 6 nt / CP-frame translation of sequence from immediately after CP stop codon to next in-frame stop codon (\*), if present, or to end of available sequence

MG800791 UGA AAGGUU KVAASGVVPEMPHVDGNSCVRRCGYTPKYLIDSYIWTCFMCSYEQA\*

## CLUSTER 37

### Alignment of 3'UTRs from the 3 segments of a representative genome

```
RNA2      UGA-----
RNA1      UGA-----
RNA3      UGA CUACACUCGGGAGAUUACCUGAGUGAGCUUGAGUACGACCCGAUGUCGGGUUGGUUU
          ***

RNA2      -----CUGUUGUUAU--GAAUUUUAAUGGUUAAUUUCG-----
RNA1      -----GUGUUGUUUCCA-----GUGCGUUUG-----
RNA3      CUCAAUAGAGGAGUUAGAUUGGUUUACUGUCCA AUUCCUGCUUGUGUUUUUACCAACGGU
          * * * * * * * * * * * * * * * * * * * * * * * * * * * * * *

RNA2      -----CUUUGGCGAAGGUCAUUAAUGCUAACUC-UUUGAGUUAAUGGUUAGUCACUGUGU
RNA1      -----CACUGAUGCUAACUC-UUUGAGUUAAUGGUUAGUCACUGUGU
RNA3      UAUCGCCUUGGCGAGGACCAUUGCUAACUCUUUUGAGUUAAUGGUUAGUCACUAUGU
          ** * * * * * * * * * * * * * * * * * * * * * * * * * * * * * *

RNA2      GCGACUGCUACGAGAUGAACCUAUGGGGUAUCAAUAGUGGAGAUUCUJAAUCUGUC
RNA1      GCGACUGCUACAAGAUGAACCUAUGGGGUAUCAAUAGUAGUGAGAUUCUJAAUCUAUC
RNA3      GCGACUACUACGAGAUGAACCUAUGGGGUAUCAAUAGUAGUGAGAUUCUJAAUCUGUC
          * * * * * * * * * * * * * * * * * * * * * * * * * * * * * *

RNA2      GGUUGCCCGAAGAUCGUAUGAUUACGACUCCAGAUUAGUAUGGAGAUUCUACAUUUAAACU
RNA1      GGUUGCCCGAAGAUCGUAUGAUUACGACUCCAGAUUAGUAUGGAGAUUCUACAUUUAAACU
RNA3      GGUUGCCCGAAGAUCGUAUGAUUACGACUCCAGAUUAGUAUGGAGAUUCUACAUUUAAACU
          * * * * * * * * * * * * * * * * * * * * * * * * * * * * * *

RNA2      UACGUUAAAUGUAAAGUAGCUAAGGCUACC-
RNA1      UACGUUAAAUGUAAAGUAGCUAAGGCUACCG
RNA3      UACGUUAAAUGUAAAGUAGCUAAGGCUACC-
          * * * * * * * * * * * * * * * * * * * * * * * * * * * * * *

RNA2      -
RNA1      A
RNA3      -

RNA1 NC_040435 248 nt
RNA2 NC_040436 264 nt
RNA3 NC_040437 360 nt
```

### All sequences in the cluster

1 Tea plant line pattern virus

Accession number / CP stop and 3'-adjacent 6 nt / CP-frame translation of sequence from immediately after CP stop codon to next in-frame stop codon (\*), if present, or to end of available sequence

NC\_040437 UGA CUACAC LHS GDY LSELEYDPM SGWFLNRGV RWYYCPIPA CVFTNGYRLGEDH\*

## Supplementary Data D

CP amino acid sequences from the representative RNA3 accessions (one per cluster, as defined above). Sequences were aligned with MUSCLE [7] with default parameters. All cysteine and histidine residues are highlighted.

```
MN386958 -----MSSSNKGTSVSANNRQSAGPNNAPQGGNAPQGGKINA-----PSGRRV
JN107639 -----MSSSRG--VRSVNRCPTHVDELDCSANNC--RWTPAGSVNARQR
OL539725 -----MNSRVRDKSLFGITSGCTNTSIITPDHPSNVMSSSQSSGQ--VSNRQR
MG800791 -----MSSSGKNGQ-----VTSKQR
NC_005854 -----MYELFNHSLQPNQLTPCLRTRANGGQ-----VSNRQS
OM323991 -----MSSQRNSGQETT-----VSNRQR
OL472062 -----MSSSKNGNQCCCFDDLDAANSCRRRCNGRKANSQKPSNRDI
NC_027930 -----MSARGNNNNHVCQHRFDELDAASSRCEICHP----VSNRQR
NC_011555 MSTLTKNPDQPSNAMSANRGRNGISNSNRGCPNCFDNLDAASNCTRCNPA--VSNRQR
NC_008706 -----MSVNRGKNVLNNSNGCPTCFDKLDAATNCARCMRNGG-VSNRQR
OL584350 ---MITSTTNPDLPSNAMSTRGKNNNGKCPHFDELDAHNCNCVGGG--VSNRQR
NC_003845 ---MNTLIQGPDHPSNAMSSRRNNRSNRCPTCIDELDAMARNCPAHNTVNT-VSRRQR
NC_040394 -----MSTSRNNNQPTCFDELDAANNCNRHGGVNS-PSNRQR
NC_022129 -----MNTLNKSPDLPSNAMSTSRFNRRNCQVCFDELDALANNCPRHGVNQ-PSNRQR
NC_006066 -----MSNAFCASGLRSHVGNCPRRKA---SPGQKNRT-RIYALER-KRANVR
OL964098 -----MNAQGNAFCALCGAKLPNMGRRQ----PPCAG-----SAPRRG
NC_038776 -----MSTAVRV-----LPRGVG
OL472059 -----MATNNNCPVTLNGRTYVPAG-NNAP-----ARQGRR
ON932436 -----MSNNAIEINGQWYIPQSGRQPKSVNNAP-----VIRGRR
NC_003810 -----MSGNAIEVNGQWYSPVTNNNAPSR-----GRGRGR
NC_011807 -----MSGNAIEVNGRWYTPAP-NNAPTR-----GRGGRR
NC_009536 -----MSGNAIEINGRWYQPAP-NSAPTR-----GRGGRR
NC_003570 -----MSGNAIEVNGRWYQPAP-NNAPTG-----SRGGRR
NC_003546 -----MANRSNAIEVNGVWYNRA--DNAPVA-----NARGRR
NC_003835 -----MSNFSNAIEVNGKWYSPV--NAPP-----NRGGRR
NC_039076 -----MSNTSNAIEVNGKWYSPM--NNAPA-----NRGGRR
NC_040437 -----MSTN-----TQQKKT
NC_003453 -----MLKMNAPQNKGGKKQNARTTQFAQRRAA-----AARGEI
NC_003480 -----MVCKYCNHT-HPGSCAGCKWCHSTNRFAPPKR-----AVARQA
HG328285 -----MVCKYCGHT-HPGACAGCKWCHGTSRSAPPKN-----AVSRAQ
NC_022252 -----MVCKFCNHT-HAGGCGQCKKCHGTKAAGPSVK-----AQDRAK
KU947035 -----MVCKLCNHT-HARGCAKCKKCHPQGAAPPSAQ-----NVQRSK
NC_025481 -----MVCKLCGHT-HAGGCVKCKKCFPTGAAPASER-----ARQRAR
NC_040470 -----MVCNRCNHT-HAGGCRSCRCHPRDAAPPP-----PRARAR
NC_004364 -----MVCRICNHT-HAGGCRSCKRCHPNDALVPLR-----AQQRAA
MW962375 -----MVCRRCNHT-HPGGCDKCKKCHPTTASSSNPR-----QVARAA
NC_006568 -----MAFCNVCGKQMPCCG-----VHRRRG
MN527504 -----MAFCNVCGKQMPCCG-----VHRRRG
MZ170698 -----MTFCSTCGKRMPCGMNHN-----KSKGKS
NC_008038 -----MSGKAIKSGKPTTRSQSF-----ALARKN
KX196164 -----MSGKAVSKGKPTARSQSF-----ARQRKM
```

```
MN386958 RNQQRARWRSLASGQ-----AGNVNPL-PVP-----VTITGPMNGP
JN107639 RNARRAATFRNNQA-----ASVPL-PVP-----V--RVTQAP
OL539725 RNARRAAAYRNKLQQQP-----IAKVPPV-PVV-----PTRPIPVYPASQQ
MG800791 RNAQRAAKFRNSQPA-----AAKIPLV-PVV-----SVSRPQ
NC_005854 RNVRRAAAFRNSQQT-----SARIPV-PVI-----VPSRPN
OM323991 RNARRAASFRNS-----QAAARVPL-PVPVPTGPISVI--PASRSQ
OL472062 RNQRRSAAYRQKLA-----AANTPLV-PVV-----QVCRPN
NC_027930 RNQRRAAAFSNAITNN-----NASQVRR-PVP-----VIPVGN
NC_011555 RNARRAANFRNQRKFDGLR-----ALQAPVPL-PVV-----PVPQPA
NC_008706 RNARRAANFRNQ-----RPV-PVV-----PVSAPT
OL584350 RNARRAAMFRN-----AQAKPVVGPVY-----NQVSRP
NC_003845 RNAARAAAYRNA-----NARVPL-PVV-----SVSRPQ
NC_040394 RNARRAAQYRNMQR-----VATQSVPL-PVP-----VAPVIR
```

NC\_022129 RNARRAANYRN-----QTAMVRPV-PVV-----PVSRPK  
NC\_006066 VPPGTTLNPKFFAQFSGYNAEECDLLDDVINAIIPSVSV-SAA-----SQ--KRVTEA  
OL964098 KPTNRSRNYAMNRQRNS-----CMQATQPMIGTI-----PVSLGY  
NC\_038776 KPTQRSRNFAAQRQRSN-----AMQATQPMIGSI-----PVALGY  
OL472059 KPTQRSRNF-----AARRSTPP-PML-----MGCHPT  
ON932436 KPTRSQAWA-----QGNRSQPPDRMM-----FGAMRS  
NC\_003810 GPTARSRNWAQSRA-----NAARSRPQ-TLV-----IGTMPT  
NC\_011807 QPTARSRQWAQQA-----NARRSQPQ-ALM-----IGSVPT  
NC\_009536 QPTARSRQWAQGLA-----NVRRSQPQ-QLL-----VGSMP  
NC\_003570 QPTARSRQWAQQA-----SVRRSQPP-----LSVNSV  
NC\_003546 RPTNRSRNWA-----QGQRSQPQ-RMV-----VGSMPI  
NC\_003835 KPTARSRNWA-----VQQRSQPQ-NMV-----VGSMPI  
NC\_039076 KPTARSRNWA-----QQQRSQPS-DMM-----VGSMPI  
NC\_040437 RQNKRSTQFGQNRKQR-----AQSTGESS-TVP----NFGTLRLEWVRRGP  
NC\_003453 ETSSRNITAR-----SGGPPVPR-SIR-----TE--WELVGP  
NC\_003480 NPNKGKIPVSVS-----RAGRSIRR-GGQ-----LGRLGA  
HG328285 ANPNKGKIPVRV-----FNPSV-VRR-----TA--WEVRGP  
NC\_022252 NNPNGKSPSGTKSPGAK-----GAPKDKQV-QKR-----TD--WTVIGP  
KU947035 NNPNRIGATSRV-----GSSSSAPVVRTS-----WTVIGP  
NC\_025481 NNPNRVVTSRVG-----SSSKGANA-PTS-----WTVNGP  
NC\_040470 AQNAVARTLARP-----ATSAGEPR-RLQ-----WTVIGP  
NC\_004364 NNPNRNRNPNRVSSGIG-----PAVRPQPVVKTT-----WTVRGP  
MW962375 NNPNRIR-----AVQQSQPR--TT-----WLRTRGP  
NC\_006568 RPTQRSQNFARRGGMAPRP-----NTANNLAM-PTA-----VRTEWEINGP  
MN527504 RPTQRSQNFARRGGMAPRI-----NTANNLVM-PTV-----RTEWEINGP  
MZ170698 KPTSRSQNWQAHRKSGVGSNT-----SGSRQLPK-ILP-----SRTDWMHGP  
NC\_008038 NNTTPPAGFVKKQFPS-----GSSKISE-----WMLHGP  
KX196164 NAPLPSSSKRTSL-----SESSKSE-----WRLHGP

MN386958 KRDV-FRLPRGQMWVKIAAQFSFAK-PTTSN--DAIQLSSLIGLCSQI-TDEVKIFRLIF  
JN107639 PRPD-FRLPNGQVWVRRNPTEFAAK-GDDAD--DAVKVGTLDIAIPEI-NADTKLYRVLV  
OL539725 KAKNPLKLPNNQVWVRRDPGVWNAK-TNDTN--DAIPITTMLSGIPEI-RPETKIYRLIF  
MG800791 GSKASLKL PNNQIWVCKKAKEWGAK-TSDYN--DALTFTSILEGIPEI-KDDTKNHLRII  
NC\_005854 GPKASLKL PNNQVWVYKVASELAAK-TSDAN--DAISLTTMLSGISDV-KPETKLYRVLV  
OM323991 GSKSALKLPNSQVWVCKAAAEWGAK-TTDAN--DAIPIKTMFSGIPEI-KPETKFFRLII  
OL472062 ESKSPFKLPGNQVWVSRKAEDWGAK-TAETN--DAIALTTIFRKFEI-TPETKIYRLLF  
NC\_027930 SRPT-FRLPGNQVWIRLTASSWAAK-TVDTN--DVLPLKNIFNGINEI-DSETKIFRLII  
NC\_011555 TQRN-LRLPNGQVWVTRKPTDWAAC-VNDAN--DAMLLKTIKIFDGIPEI-KPDTKVFRVLI  
NC\_008706 TSKS-LKLPNGQVWVTRKPSDWAAC-TVDTN--DAITLKTIFNGIPEI-NDDTKIFRVLI  
OL584350 VPKASFRLPNNQVWVTRKAGEWAEK-STDTN--DAITLRTIMEGIPEI-GEDTRVFRILI  
NC\_003845 AKAS-LRLPNNQVWVTRKASEWSAK-TVDTN--DAIPFKTIVEGIPEI-GAETKFFRLII  
NC\_040394 SRRVNFRLPNSQVWVTRKASEWAAK-TTDTN--DAISLRTILNGIPEI-SDETKVFRLLI  
NC\_022129 TTAS-LKLPNGQVWVTRKASEWAAK-TVDTN--DAIPLKTIMDGIPEI-TEESKIYRLLI  
NC\_006066 QLVVGDPLKGIQGPCTHMGDATITA-RTGGVGRGYMALLDALLTGIPDA---TRLKSLVM  
OL964098 NLPT--NFPSGE-WHKMSGYSFGSS-SASLV--YYTTLEAELKKFPDLIHANTAVYSVLI  
NC\_038776 SLPV--QFPGSE-WHKISGYSFGST-STNYV--YYQTFEALKKFPDLIHANTVVYSVLI  
OL472059 HLPVWRSFPNEQ-WHEIGGFSFPKSWGGNL--AIMNFKNEFDKVKSL-HSTTKTYSVML  
ON932436 SLPSWISTPGEQ-WHEVEGLSFPASWTTGSV--ASASMRTLGKIRPL-HDSTKVYSVMY  
NC\_003810 NLPTWKSFPGEQ-WHVVSFGSFPDRWNGNI--AYASMRTLGKIKTL-HEITKVYSVMY  
NC\_011807 SLPTWKSFPGEQ-WHEVSGYSFPNSWGSGL--AWLTMANELNKIKTL-HDSTKVYSVML  
NC\_009536 NLPTWKSFPGEQ-WHEVSGYSFPDRWGSGL--AYMTLRSELSKIRTL-HDSTKVYSVMI  
NC\_003570 PALTWRSFPGEQ-WHEVSGYSFPDKWSAGTL--AYMTLRAELGKIKTL-HDSTKVYSVMI  
NC\_003546 DTITWKSFPGEQ-WHEFSGFSFPDAWGSAKI--AYASMRTLGKIKSL-HHTTKVYSVMY  
NC\_003835 NLPTWKSFPGEQ-WHEVSGFEFPASWISGDI--AYASMRTLGKIKAL-HDSTKVYSVMY  
NC\_039076 GLPTWKSFPGEQ-WHEVSGFEFPASWISGDI--AYASMRTLGKIKAL-HDSTKVYSVMY  
NC\_040437 GDLDILQFPYQ--WVAKAESLAKAT-SNDIW--YIIDLHEYVKDMMEF---PTSVKGFVF  
NC\_003453 SVGA-RLIQGPHNEVVKGEAVASST-TAGQY--FSIQISTYLEKFLEM---GVQLNSMTV  
NC\_003480 RMLS-RKFLKG--HRVLSREVTAT-VEGRF--VNIDFADVFRDLLEK---DLKVYTFII  
HG328285 NVEP--RVPKG--HRVFSREVTAT-VEGRF--VNIDFADVFRDLLEK---DLKVYTFII  
NC\_022252 NVQP-VNHPNG--FTLRSCRDVQAT-VAGKF--LHINFKTAFPQLLNQ---ELKIYSFAV  
KU947035 NAVP--NVPRG--TVTRNYADVAVS-APSRY--LTVDFSDRFPHLVGN---KLRILSVLM  
NC\_025481 NTEPIV--PRG--TVLRSYTDVVAS-APGKF--LTIDFSERFPNLLGH---KVRILSILL  
NC\_040470 NEVP--RVPRG--YVAHSNREVVAT-SAGKF--LHVNFSTTFPQLLGL---NLRILSVVV



NC\_004364 NVPP--RIPKG--YVAHNRHREVT--EAVKY--LSIDFTTTLPLQMLGQ---NLTLTIVIV  
MW962375 NEVPLV--PRG--HVVKSVHEVT--SAGKY--LSIDFSAAFPQLQNG---KLNVLISILL  
NC\_006568 NTQV-RRFPGL--VTVSKGVAIRST-GAGTY--WGFAISTAFHNLGQ---RVLCDALVM  
MN527504 DAQV-RRFPGL--VTVSKGVIRAT-VAGSY--WGFLATAFNSLNGQ---RVLCDAMVL  
MZ170698 NVKP-KRFNGV--VSTSMGTAVTAP-KKGSY--YSISIKDCRLRILGNT---DTTIFGIII  
NC\_008038 NVPV-KSFSGM--ISRTEENLTVNST-ASGVY--YTMKVRELKDF-AV---DTKVYGVIV  
KX196164 NVPV-KRFTGM--VSRSENSTNSV-ARGEY--FATQIKDLFKGHDS---TKVYGVIV

MN386958 GFIA-KSDGHF-ALVE--EAGDNIPSLPVVGRVSFAEGVYRSREIHF-AGLTSSDL--S  
JN107639 GFVA-VSDGIF-AFVR--DV-GDDIPNLPVVGRVGFTRQTYRSRSISL-NGAVASDC--R  
OL539725 GFVA-ESNGSF-GIVEDEGVAGNTVPDPPVVGREKFKHHEYTSRDVNL-EGKTSDEL--K  
MG800791 GFVA-ESDGSF-GIVEDEKVNVDGTPDPPVVGVMGFKKHTYKCRDINL-EGKTRDEL--K  
NC\_005854 GFVA-ESDGSF-GVVEDENVSGNVDPDPPVVGGRAGFKKHTNKCRDINL-EGKTPDEL--K  
OM323991 GFVA-ESDGSF-GVVDENVASNVDPDPPVVGGRVGFKHTYKCRDINL-EGKTPDEL--K  
OL472062 GFVA-ESAGFY-GVVN--GVSGDTPDPIVGRVGFKHCYRCRDVDL-GGKTTEQL--A  
NC\_027930 GFVA-MSAGTF-GLVD--GVTSTVDPDPIVGRVGFKNTYRSRDFDL-GGKTPLQL--D  
NC\_011555 GFVA-MSDGTG-GLVD--GVTGDTPELPIIGRWSFQRDVYRSRDIIGL-DGQPADQL--S  
NC\_008706 GFVA-VSDGTF-GLVD--GVVGGSIDPPIIGRLGFKKNTYRSRDFR-DGKLTQV--A  
OL584350 GFVA-KSDGTF-GMVD--GVTDDVDPDPIVGRVGFKNTYRSRDFHL-GGKLTQV--A  
NC\_003845 GFVA-VSDGTF-GMVD--GVTGDVIPDPPVVGRLGFKKNTYRSRDFDL-GGKLLNQL--D  
NC\_040394 GFVA-VSDGTF-GLVD--GVTGDVIPDPPVVGRLGFKKNTYRSRDFDL-EGKTPPNL--A  
NC\_022129 GFVA-VSTGTF-GIVD--GVTGDVIPDPPVVGRLGFKKNTYRCRDINL-EGKTPSNL--D  
NC\_006066 HITFLSDGGVL-GLNT--E-RSDQYVEPNLKRKRFEEKESPFWAQILFPDNLVSDV--K  
OL964098 GFTA-KSDGYA-GFDN--AFDSAALKEPEAPNRNRLNGKYCGLEMVMPAGTTASDL-NG  
NC\_038776 GFTV-KADGYP-GFDE--AFDSTALKEPEAPNRHRLSSSKYCGLEKVPAGTVASDL-NG  
OL472059 GFTC-LYDGYA-GFVA--GTEGKTPTAPVAPDRMRVKAGKYGARQHVYAPGTAVLDA--S  
ON932436 GFTC-KSDGYA-GFVE--GFDVNNPTGPIAPNRVRVKAGKYAARQLRCPGGTTIADL-KA  
NC\_003810 GFIC-KSDGHA-GFIT--GFDTNPTGPVAPDRVKKKNAYCAKQVFPAGTTVSEL-KN  
NC\_011807 GFTC-NYDGYA-GFVE--GFSTSNQIHIAPDRIRVKKKGYGARQVFPPTGTTVSEV-RS  
NC\_009536 GFVC-KSDGYA-GFMD--GFDVNNATGPVAPDRIRVKKKGYCAKQVFPPTGTTVSEV-KA  
NC\_003570 GFVS-KSDGYA-GFMD--NFDANHATGPVAPDRIRVKKKGYCAKQVFPPTGTTVSEV-KA  
NC\_003546 GFTC-KADGYA-GFMD--NFDANATGPVAPDRIRVKAAYCARQLVLPFGSTVADL-RD  
NC\_003835 GFIT--KAGWLCRLKD--DFDPSNATGPNAPNRTRVKAGKYSKQLVFPPTVAEV-KS  
NC\_039076 GFIC-KADGYA-GFKD--DFDPSNATGPNAPNRIRVKAGKYCARQMVFPPTVSDV-KS  
NC\_040437 LFEA-NLSGQA-CLVT--KKTGSFKDAFSSLNAFKFEKCHTAVQLLAPSILTFATFSAG  
NC\_003453 LCASLQSGSIV-CLTH--KFTTCEA-AISTLSGLRFREGRRLLGFQVLPSSDTVAGDV-AS  
NC\_003480 RVNSLSSNGWI-GLVE--DYDESNPKGPNPMDRKGFKKQPRGGMWEAPPNTTFDDF-VR  
HG328285 RVNSLSSNGWI-GLVE--DYDESNPKGPNPMDRKGFKKQPRGWQWEAPPNTNFDDF-VK  
NC\_022252 RCSTSIGNGWV-GLVR--GFNPSSPTGPAVLTRKGFLLKQARGWQWLAPSDLEYDKF-SE  
KU947035 RVNSFHSGGWV-GIVE--DYDVSSPKGPDMPTRKGFLLKQARGWQWLAPSDLEYDDF-AR  
NC\_025481 RVNAFHSGGWV-GLVE--DYDVSSPTGPDPMRRKGFMANQARGWQWMAPSGLEYDDF-AK  
NC\_040470 RASCLVSAGWV-GMLE--DHDENHLRGPALSRLKGRFQDQPRGWQWLAPSDLEYDRF-AN  
NC\_004364 RMNSMSSNGWI-GMVE--DYKVDQPDGPNALSRLKGFLLKQPRGWQFEPPSDLDFDTF-AR  
MW962375 RLNSFHSGGWV-GLVQ--GYDASNPRGPDALNRKGFLLKQPRGWQWLAPTNLEYDDF-VR  
NC\_006568 RFISDHSGGVV-GVVR--GYNPDHPTAPNALTRRRFHKGVATGLQFLAPTNQVVDEI-AD  
MN527504 RFVSDHSGGVV-GVVR--GYDLHDHPTAPNALTRRRFHKGVATGIQFLAPTNQVVDEI-AD  
MZ170698 RFCSDHASGVF-GLVK--DFTPTDPIPPNLSRRKFKVGEATGIQLLAPINLKVNDV-NS  
NC\_008038 RYCLDVSNGVY-GLIK--GFDVNAPVAPNPLQRRKFTAKQASGVQILAPTMGMTVVDI-PD  
KX196164 RYCLDFSNGTF-GLIK--EFDVNNPTEPNLSRRKFIKMCASGVQILAPTDVTVADI-PD

\*

MN386958 ELKLVWDLKDDNSRKAAGR----IETSDYWIAISRPNDVYPPGDILRNSD-----  
JN107639 NHAFLWSL--NDHHRDARR----VVTADYWF AISKPAMLMPPEDFLENSN-----  
OL539725 YKAVIWCL--DENRRAEKR----VSLTHYWF AISRPPPLMPPADILVNGNGNY-----  
MG800791 NRAIWWCL--EENRKAAGR----VAMTHYWF AIDRPPVLMPPEDILVDGNQ-----  
NC\_005854 NMAVWVCL--DENRKAAGR----IAFTHFWFAISRPSPLMPPENILVDGNQ-----  
OM323991 HRAVWVCL--EDNRKVAKR----VMMTHYWF AISRPPPLMPPENILVDGNSL-----  
OL472062 DKAIWVCL--DENRKAAGR----VTLADFWVAISRPAIPLMPPDDFLVEGDQ-----  
NC\_027930 GKAVWVCL--EEHRRDEKR----VQLADYWF AISRPPPLMPPEDFLVNSQ-----  
NC\_011555 EKAVWVCL--NTNKRAEKR----VRLADFWVAIAKPKPLMPPDFLVEDN-----  
NC\_008706 DKAIWVCL--DSNRRDAKR----VRLADFWVAISRPNPLMPPDEFSLGSDS-----  
OL584350 SKAIWVCL--DDKRREAKR----VSLANYWLAISRPAIPLMPPEDFLVEGSN-----  
NC\_003845 DRAVWVCL--DERRREAKR----VQLAGYWF AISKPAMLMPPEDFLVNQD-----

NC\_040394 DKAIVWCL--DSGRRDAKR---VSLANYWLAI SRPTPLMPPSDFLVESD-----  
NC\_022129 GKAIWVCL--DSNKRDAKR---VMLANYWLAI SKPAPLMPPEDFLVSSD-----  
NC\_006066 NYAIMIKF--DSDYSANTP---LYTRE C WVN H YQLPSAVIPEEAFARK-----  
OL964098 S H AFVWAI--DAAFP T T M P A N S G I K V H S M W W Q T A K L P P M K P P Q N F L A C E K-----  
NC\_038776 S H A I L W V I--D A A F P S T M N A N S G I K V H S I W W Q T A K L P P M K P P Q N F L Q C E K-----  
OL472059 DLWFVWQF--DSTPKDGSNV--ITVTKIYISTMPLPGLKPPNFLVCEE-----  
ON932436 SWSFVWQF--DAAPATATVNQ--ISVVGFWSTTPLPGVKPPDFLVCEE-----  
NC\_003810 DWSFIWEF--DAAPVVGTEKQ--VTVTQFWSTTPLPGVKPPSNFLVCEE-----  
NC\_011807 NWT F V W N F--D A A P P T G S K D A--I T V T K F Y I A T S P L P G V K P P S N F L V V E E-----  
NC\_009536 N W N L V W D F--D T A P A T G A V H E--I S I T K F Y V S T T P L P G V K P P S N F L V V E E-----  
NC\_003570 N W N M V W D F--D T A P A T G S E R E--I F I T R F Y V S T T P L P G V K P P A N F L V V E E-----  
NC\_003546 N Y N F V W E F--D A A P A A G T A N I--I S V T K F Y V S T V P L P G I K P P P N F L V C E M D D K-----  
NC\_003835 A Y N F V W Q F--D S A P A S G T A N V--V K V V K F Y V S T T P L P G V K P P A N F L V C E E-----  
NC\_039076 S Y N F V W Q F--D A A P A A N A P N M--V K V V K F Y V S T T P L P G V K P P S N F L V C E E-----  
NC\_040437 E V A L V F K F--E G T L T A G A E---F M T R K V W G Q S S M L P K V E I N K N L L R G Q-----  
NC\_003453 N V R L V F K F--D K A F E A N A P---L I E R K V W V S T S R L P E I M I P A N L L V P D E D-----  
NC\_003480 K F R L V L E F--K T N F A A G A K---V F M R D L Y V I T S E L P P V Q I P T N V L L I D E D L L E L-----  
HG328285 K F R L V L E F--K T N F A A G A K---V F M R D L Y V I T S E L P P V Q I P S N V L L I D E D L L D L-----  
NC\_022252 E Y E L V F E F--K S D Y P I G V---V M T R D L Y V V T S S L P R V R I P D D L L F V D E D L L E I-----  
KU947035 T H R L V F E F--R T D F A A T A K---V L C R D I Y V V T T E L P R M M I P S D L L F V D E D L L E D-----  
NC\_025481 K H R I V L E F--K T E F A A E Q K---V L T R D L Y V V T T E L P K V T I P G D I L F V D E D L L D V-----  
NC\_040470 S H R L V F E V--K N E F T A G V K---V L V R D I Y I V V S D L P R I V I P N D I L M V D E D L L D V-----  
NC\_004364 T H R V V I E F--K T E V P A G A K---V L V R D L Y V V V S D L P R V Q I P T D V L L V D E D L L E I-----  
MW962375 S Q R L V F E F--K T N F V A N T K---V L S R E L Y V V V S D L P R V E V P R D L L M V D E D L L E I-----  
NC\_006568 D I Y I V F Q F--D T A F T A N A V---L L T R D R Y L Q H N A V P R V E I P A D V L R T E A L P V E D I R G--  
MN527504 D I F V V F R F--D T A F V A N T T---L L T R D R Y L Q H N A V P R I E I P A D V L R T E A M P V E D Q R G--  
MZ170698 N T F L V L K F--N T D F E A G A I---L W M R D M Y L Q H S A P P K V D I P E S V L Y T D S L P T E E V D---  
NC\_008038 D L W F V I K Y--D N A F Q P N V P---V W F C T Q Y L Q H S M P K R V E V P D S V L Y A E R D T A L M D A M D K  
KX196164 D L W F V I K Y--D K S F D A N V P---V W V R T Q Y L Q H S M P P K I E I P D S V L M A E R D S I L V D A M D K

.: . :

MN386958 ----  
JN107639 ----  
OL539725 ----  
MG800791 ----  
NC\_005854 ----  
OM323991 ----  
OL472062 ----  
NC\_027930 ----  
NC\_011555 ----  
NC\_008706 ----  
OL584350 ----  
NC\_003845 ----  
NC\_040394 ----  
NC\_022129 ----  
NC\_006066 ----  
OL964098 ----  
NC\_038776 ----  
OL472059 ----  
ON932436 ----  
NC\_003810 ----  
NC\_011807 ----  
NC\_009536 ----  
NC\_003570 ----  
NC\_003546 ----  
NC\_003835 ----  
NC\_039076 ----  
NC\_040437 ----  
NC\_003453 ----  
NC\_003480 ----  
HG328285 ----  
NC\_022252 ----  
KU947035 ----  
NC\_025481 ----

|           |      |
|-----------|------|
| NC_040470 | ---- |
| NC_004364 | ---- |
| MW962375  | ---- |
| NC_006568 | ---- |
| MN527504  | ---- |
| MZ170698  | ---- |
| NC_008038 | IVSG |
| KX196164  | IVYG |

## Supplementary Data E

Sequences of the asparagus virus 2 clone used in this study.

**atg** ORF start codons  
**taa** ORF stop codons  
**G** 5' end of the AV2 sgRNA4 as determined by RACE-PCR

### >RNA1

gtattgtgcagatattatTTTTacgcacgaccCGgattaatcagTTTTctgagtatataccCGatagaaactca**atg**gatac  
gatcgtgcagcatgaatctaccggtttacgtgctgatgacctgattaatgatacgcagcaggagaaatgctgctcgtccag  
aacagctgttggcaggcttgtttctgatgccgctgtgcaagtcgttgctaggcaatgtgaccttacaccagcgaagcct  
ctaatgtgtctttcaattgtcaccggaagaccagaatgcattaaaggagagattttcctggaagagagctccaatttag  
gaatcgtcatattcttctcactctttgctggctgcacaccgcttgtgagacggattatataatggacgcttccaga  
ctgaaaataccatgatcatcgatataggaggaaatTTTTgcaccatagtaaaatgggtagggataatgttcattcgtgt  
tgcctatattggatgttcgtgatgggtgctaggtataccgatagatttatgtcagttgctggatcattggaaaaacaacc  
agatcgtgaattacggttgaattattgttccaatagattcgaagaatgtgatatttccgctccttgggCGatggcaatac  
attctatttccgatattcctatcactaccgtggttaaacattgttttagaagaggagtgaaaaaactcattgcttcgata  
atgatggatcccatgatgctcatcgcactaagggtttcattcctcgcacttaatgtccaatgggaaattgaaaccgaaag  
cgatggaaagtcccgcagctatttcttttcatTTTgtcgcagctcccggattgtcatattctcataactatgatgtgctaa  
tgcagtacatgacttgaatcaagtcataatcagggaaagccgctacagagttgaacgcggttgcagatctatcgggt  
gtttcattgtcgcagatcacccttgcagctactgctggatttgagcgtttagatctagttcccCGatgCGcagatttcatg  
cgttggatgacgctttaaagacggaagacctgggtgaggggtggcgttcccagatagggatgcatgggagataaaat  
acatcattgctgacacagattttgtcagaagatggctgaagttcattccgctcaataaagcctgacaccaaattggaa  
gatttgggtgaaatccattgCGacgatgatttctcttctcgaaccattgcattgttaattggcgttactatgacagctgg  
cacaccgatgaccattgaggattatgttccaatggcagttactttcgttgcctttgctatatcacgctcataagtcattg  
ctaaaggaattaaaatggtggagcagagaggtaacataatggaccCAAatgatcattatgattatgaaaaggatgga  
tccgatgtaagagttttccaaccacattatcccCGatgagaataccatcaagtccttattttcccctcgaagcga  
aatcagtgataattcaatgttgatttacagtcAAagtcctcatgctactgttgttgatgagattaaaacgcttttggat  
gggatgttgggatactgatgatgcagtcatacaatcattgccctcctttataaaatggaggatgtgttccaagttacc  
tccgaccattattgtttgtcacacagcttgtctgttgattattgggtggagggtttgtatgatagctatgatgcccttcg  
taaggtgataagaaaagcttgaagaggaggagctcataaaacaaaggttgaaaatgccctcctaaaaattgctgagg  
tcttggagaacccgatgttgatgacgggttgaacagttgaaaacaatacctctgataaattcattattggagaagaaa  
acggaagaaattgttacaagcctcaatgcaggatctgagaaccccacattaatccctatgctgatgcaatcaagga  
agctattgcttattaccatgagcttgagggtgtaaatacgcgtaatctgagaggtgttgggtgattacctcggatggcga  
cgaaaacgaaactatgCCagtggtggtggaagagtcagaatggtgctagaaccaatggccagaaagttccattct  
aaggaccgtgatgttcccataccCGatgagcaggtatgacggttgatggtttcatTTTccttgccttggaggatgg  
tgaatcacaagggagacgtggaatccccttgccaagtacaacgttgtttgttcgatcaatcgtgtgtattttgatgccc  
gttcacgacttttaccaggttgaacaaagcccttgtgatggatgcttcttttaaagtcggtatcagaggatgggtgtggct  
ggatgtggaaaaacaacatctctactcaagcaagcgaaacctgatcagatttgttgttagcggccaaccgtgagactgc  
aaaagatgcaaaaaccagcggagttatcccggatgctctattgtaccgagttagaactgttgattcttacttgatgctca  
agaactggtttactgcccagcctttattgggtgatgagtgttctcctagttcattgctgggttgcattgacgtgcccac  
ttggcagcagtgaaaggattattgcttttgggtgataactaagcaaataccatcctgctgctcgtattccaacggctcactt  
acgtcacgctcagtgatcgggtgttttgaagcccaggacaataacctatagatgtcctagggatgttaccgccattttga  
gcgagaagttttataataccaaggtgaaaactttcaaccagtgaaaacttcattggattttgattaatatcaattcagga  
atggaaattcccgtggtgaaagatgctctataatagctcacactaaagctgataagtttgccttgaagaaattgcccagg  
aatggggaacgttgatgtgctcaccactcatgaagcgaagggaaaacgcgctgacaatgttatccttgcctagactaagta  
ggactactcatttactgtattccgggaagatgcttgatgctggtagttcacataacttagtgggtttgtcccggcataag  
aagagttgaaatactttctgtttttgcccgatgacccagatgatcaaatgaccttggaaattcgttggctctaaaacttt  
agacgaacaagagctgtccgctatagggcagctaatagtgTTTTTccatgaaacctagtgaaagggctcctccgggatgt  
gctcagcactagcctaagc**taa**gtccatattgcccatctttgctgctccggatggatgtttatacccCGctatggatgct  
attactgaaatgtaatagatgcctaatactctctcctcatggagagagtttagatgcctccaagggatgct

### >RNA2

gtattgtgcagatattatTTTTacgcacgaccCGgattaatcagTTTTctgagtatataccCGatagaaactca**atg**gatgc  
tcattatctcctttccgaattgtgtgacataaggaaatttgtctcaactcgtgttattgaacagagttttgacatcaagg  
atgatgagactacaagctatcttcaagcttggatgtattcccgcattcttgtgcctgttattgaagttccacctttgtgg  
gaagtctgctggacaagattgaggatgtgttccgcgaaactcttgggtgCGaagccgagccaatgatgatggttacat  
gccagtttctatctcttgatgatgacgatgaaacctccaccagaagcttacttgcCAAaggaagagcgtgaagcaa  
tacacgcggcaacgcttctaggtcatgaacattgggctaggttaccctggatctgatttttatgatgacattgatgatg  
ctcgtctgatgagaccatctatgatgatttgcagactgataagttgtgCGgaaatgcccgctgattcaaatcatgtggaa  
tgatggtgccatagatgctgtgtggcttagtcagtttgaatgtgaaagaccaccaaaccAAagttcaaacccagctcgg  
ttgacaagggatgtgatccagtggttattcaagcagcaattgatgatataatcccatttcatgaaatggatgatagg

tatttccaaacattagtggaacgcaggacatttcccttgaagtctctaagtggttgattgatgcttccaatttcagaga  
tttcgtaagggacaagattccttatgctgttccctgtgatacaatccgggtgccactagcaagcgtgttcatacacagcgtg  
aagcgtatttagcagtgaaagaaaggaatatgaatataaccggaattgcaatccacttttgatcttgatgaggaggtcaac  
acgtgttttaaagggttcttactcatgttgttgatgttccaagattgaggagacttcaaccgatgactgggtgtgaagt  
ggaatttttaaccaatatttatggggaagaatccacctctcaagaataccaaggaccattaccactatgttcgcttg  
ataaatacatgcacatgggtgaagactattgttaagccgggtgaggataactcgttaaaatcacgagagacctcttctgtgcc  
acgataacttatcataagaagggtatcgtgatgcagtcctcacccttttttgagtgtatgtcaagattgttttatgt  
cttgaatcaaaaattcacataacctagtggaagtgccatcaacttttcacttttagatgctgagaaattcgacgctgcta  
aatggttcaaggaagtcgatttctcaagtttgacaagtctcaaggcgaacttcatcataaagtgaggagaaaaatttc  
gaatggttgaattacctcctgggtttgtggagatgtggttccactgcacatgaacgatcacatattgttgatagagaggc  
tggattgggttttccgttgattttcaacgacgaactggagacgctaacacatattggggaacacattgggtgaccctta  
tatgttttagctagggtttatgatttgtgtaaccggaatatcacattcgttattgcctcagggtgatgattccttgattgga  
agtgtggatgagttgcctcgtggctcctgaggatttattcactactttgttcaattttgaggctaagtttccgcataatca  
accttttatatgttcaaagtttttagttagttgatcttgcggatgggtggctcgtgaagttattgcccgtgcctaaccag  
cgaattgttgattcgtatgggtagacgtgactgtcaataccaagccttagatgatttgtataacctcgtggcttgatgct  
atatattttccgagattcccgtgtttgtgaaaagttgcttctctatgcgcttttagacagacgcgaagggtcatcgat  
gtatttattgagtgctttgtaagcttaccagttgttttgctaataaaaaaaattcaaatggctctgttatcgtttaa  
cagagcaagagtgctgaagattacaaaacaacctggaagttctcattataactaagaaaaatggaatgctcaaaggaaagt  
gtcaaaaatttcccacaccgacggagctcgcgtggacgctgggaatttattcccagattaagtcggatgatgattaccg  
gatttttccctaatggtgatcttagcaccattagaggctcgtcagtttccaagacagactgcccgttcaggaaagtgtccg  
acaccgacgctcaattggtaataaaaaataccagacctcgaatcgatttccgagctgaaggagttaccaaccagcgggt  
tgttattcaaaccgttaccgccaatcatcggcgaagttcc~~taa~~agggttggtatggtttgaagtcctggcttccctcca  
attatggagatgtggtgacagggctgaaaagggccgcacgggctaaagtgcattttctattccgggtctctgatgggt  
tatacactcaatcctcctgatgtggttctgggttgcactaccaagttaccaattcctgagaaatattcctcaagatgcc  
catttctttgaaatggatgatctcgtcttgggtgacagaattctgatcagtagtaccatcctcaatggtatctcgggtcaat  
~~ga~~cgtgtttctttcatgaaacctagtgaaaggtcctccgggatgtgctcagcacctagcctaagctaagtcctatgccc  
atctcgtgctccggatggatgtttataccgctatggatgcctattactgaaatgtaatagatgcctaatactctctc  
tcaggagagagtttagatgcctccaaggagatgc

**>RNA3**

gtattcaactgagtttaaataccctttcgagactaatagaattcaatcaaacgagtagcagatcaatcgtgaaatttcta  
ataggcgtcagaaatttcgggttcccactaccttaactgtggattcagtggttttccgtttgattaagtcggcaa  
gtttgtaagaggtggagtcctcttttattagtcttgaagaaagacacgtgaacgttcatctccgtgtaattgtgaat  
actctcagcttgtagcggaaagccctcacaacgctattcctcttagtggtgggttctgttgaggagtagtctgaaa  
gaaacttcgaaaatcgccgaagttattatt~~atc~~gccttggttaaacaacacctctcgtccttacagccccaatgaag  
aacagttgtacaagcaatttctggcgcgtagaatccgtgaacaagaatttaaaaatggttagagcctgtgtgccacta  
gagtaaaaaataatggttttacatcatttgaactctgtgatgaagatacacggttcccttgtaacagcattttctgtcaa  
agtccgaaagaacattaatgttgatcatccccacattttcctcttgtgggttccctcggattttgaaatctacctcagcca  
ccgcatattaaatgtaaatatctggcagctggagatgagaaagcagttgggaagtttccgctcaatgaagccttcatc  
tttcttttgatgggaaagatccattagatgagggatgcttatgatgggaaggggttgcacttgtttattcagtgctt  
tgcccctaattctgaagcgaaggtccttaggcaggttagtccctatgtgggataattgtgccactgtcaaaatgcgtt  
actcggaaagatgtgggttctcacttaccacagcagatgaaatgcgtgagaaatgtgcttactgacaaagacacagag  
aacctgctacgacttatatggctaccgagttcgttctgcgcaatttgaagataagttcacaggtgcaccgagatgca  
attatcggacgatttaccgagacgcttgattttacacgcttggaggccgacacctgaatgttcagatgctaccgaaa  
ataaacgaaagactgtttgttggaaatggtgtagtgagattgcatggaagcgcagctctcgaataactccg~~tag~~tg  
tgagttataaagtctcgtgggatggatacccttatttgggtccccccgggactgcttgcgggaggagattt~~g~~tcttga  
agtttcttctccactttccgtcacttattcttccactacaacaac~~atg~~cttggtaatgctattgaagttaatggtcgtt  
ggtatactccagacccaataatgccccgaccagaggtcgtggaggtcgtcgtcaaccactgctcgttctagggcagtg  
gctcaaggacaggcgaatgctcgtcgtatcccagccacagggcgtgatgattgggttccgtgcctacatctttaccacctg  
gaagctttcccaggggaacaatggcagaggttctgggtattctttcccaattcgtgggggttctggaacattggctt  
ggttgaccatggccaatgaattgaataagataaaaacctacatgataccaccaaggttactcgggtgatgtgggcttc  
acttgcaactatgatggttatgccggcttctcaggggttccagtagcagtaatacaatcctatcgtcgggatag  
gatagagtgaaaggggaagtagcgggttagacagcaagtttcccactggtactacggtttccgaagttagggtcca  
attggactttcgtttggaacttcgatgctgctccccctactgggtcaaaggatgctatcactgtgacgaagttttacatc  
gccacttccccttaccgggtgtgaagccaccaagtaatttcttgggtgttgaggaa~~tga~~accagcctcgggtgagtggt  
atactccattctaatgaatgtgagaagaagaatgtgatccattctgtcattgtgaatgttatgacaatgcttgaaca  
ccttgggtgtctgcaaatgcttttgtttccacgaacct~~taa~~agggttagtgatgaaggtttctttcatgaaacctag  
tgaaaggtcctccgggatgtgctcagcacctagcctaagctaagtcctatgcccacttttgcgtgctccggatggatgtt  
tataccgctatggatgcctattactggaatgtaatagatgcctaatactctctctcatggagagagtttagatgcctcc  
aaaggagatgct

## Supplementary Data F

Sequence of the AV2 RNA3 with the AV2 RT sequence replaced by the TSV RT sequence.

**atg** ORF start codons  
**taa** ORF stop codons  
**G** 5' end of the AV2 sgRNA4 as determined by RACE-PCR  
**nnnn** TSV-derived sequence

### >RNA3-TSV\_RT

```
gtattcaactgagtttaaataccctttcgagactaatagaattcaatcaaacgagtagcagatcaatcgtgaaatctca
ataggcgtcagaaatctcggtttcccactacctaactgtggattcagtggtttttccggttgatttaagtccgcaa
gtttgtaagaggtggagtcctcttttattagctcttgaagaagacacgtgaacgttcattctccgtgtaattgtgaat
actctcgacttgtacgggaagccctcacaacgctattcctcttagtggtgggttctggtgaggagtagctcgaaa
gaaacttcgaaaatcgccgaagtttattattatggccttgggttaaacaacacacctctcgtccttacagccgccaatgaag
aacagttgtacaagcaatctctggcgcgctagaatccgtgaacaagaatttaaaaatgtttagagcctgtgtgccacta
gagtaaaaaataatgggtttacatcatttgaactctgtgatgaagatacacgttcccttgtaacagcattttctgtcaa
agtcgaaagaacattaatgttgatcatccccacattttcctcttgtgggttctcggattttgaaatctacctcagcca
ccgcatattaaatgaaatatctggcgcgactggagatgagaaagcagttgggaagttccgctcaatgaagccttcac
ttttcttttgatgggaaagatccattaggatgagggatgcttatgatgggaaggggttgcaactgtttattcagtgctt
tgcccataattctgaagcgaaggctcccttaggcaggttagtccctatgtgggataattgtgccactgctaaaatgcgtt
actcggagatgtgggttccctcacttaccacagcagatgaaatgcgtgtgagaaatgtgcttactgacaaagacacgagg
aacctgctacgatcttataatggctaccgagttcgcttctgctcgaatttgaagataagttcacaggtgcaccgagagtgc
attatcggacgatttaccgagacgcttgattttacacgtcttggagggccgacacctgaatgttcagatgctaccgaaa
ataaacgaagaactgttgtttgtggaatggtgtagtgagatgctgatggaagcgcagctcgaataactccgtagtg
tgagttataaagtctcgtgggatggatacccttatttgggtccccccgggactgcttgcgggaggagattgtcttga
agttccttctccacttccgctacattcttccactacaacaacatgtctggtaatgctattgaagttaatggctgctt
ggtatactccagacccaataatgccccgaccagaggtcgtggaggtcgtcgtcaaccactgctcgttctaggcagtg
gctcaaggacaggcgaatgctcgtcgatcccagccacaggcgtgatgattgggtccgctgcctacatctttaccacctg
gaagtctttcccaggggaacaatggcagcaggtttctgggtattctttcccaattcgtgggggttctggaacattggctt
ggttgaccatggccaatgaattgaataagataaaaaccctacatgataccaccaaggtttactcggtgatgttgggcttc
acttgcaactatgatggttatgccggctttgtcaggggtttcagtagcagtaatacaattcattcctatcgtcgggatag
gatacagagtgagaaagggagtagcgggtgctagacagcaagttttccccactggtactacgggtttccgaagttaggcca
attggactttcgtttggaacttcgatgctgctccccctactgggtcaaaggatgctatcactgtgacgaagttttacatc
gccacttcccctttaccgggtggaagccaccaagtaatttcttgggtggtgaggaatgactagatggtcacctcggtag
gaccgagttgccgtacattagaggttaattcctgtgtacgatgtgggtttacaccaccacgtattgtagatcaatcgttt
ggcgtgtaactttgttccatgaacaacatgcatagtggttagtgatgaagtggttctttcatgaaacctagtgaagg
gtcctccgggatgtgctcagcacctagcctaagctaagtccatgcccattttgctgctccggatggatgtttatacc
cgctatggatgcctattactggaatgtaatagatgcctaatactctctcctcatggagagagtttagatgcctccaaagga
gatgct
```

## References

1. Zimmermann L, Stephens A, Nam SZ, Rau D, Kübler J, Lozajic M et al. A completely reimplemented MPI bioinformatics toolkit with a new HHpred server at its core. *J Mol Biol.* 2018;430: 2237-2243. pmid: 29258817
2. Burley SK, Bhikadiya C, Bi C, Bittrich S, Chao H, Chen L et al. RCSB Protein Data Bank (RCSB.org): delivery of experimentally-determined PDB structures alongside one million computed structure models of proteins from artificial intelligence/machine learning. *Nucleic Acids Res.* 2023;51: D488-D508. pmid: 36420884
3. Mistry J, Chuguransky S, Williams L, Qureshi M, Salazar GA, Sonnhammer EL et al. Pfam: The protein families database in 2021. *Nucleic Acids Res.* 2021;49: D412-D419. pmid: 33125078
4. Ronquist F, Teslenko M, van der Mark P, Ayres DL, Darling A, Höhna S et al. MrBayes 3.2: efficient Bayesian phylogenetic inference and model choice across a large model space. *Syst Biol.* 2012;61: 539-542. pmid: 22357727
5. Langmead B, Trapnell C, Pop M, Salzberg SL. Ultrafast and memory-efficient alignment of short DNA sequences to the human genome. *Genome Biol.* 2009;10: R25. pmid: 19261174
6. Bol JF. Replication of alfamo- and ilarviruses: role of the coat protein. *Annu Rev Phytopathol.* 2005;43: 39-62. pmid: 16078876
7. Edgar RC. MUSCLE: a multiple sequence alignment method with reduced time and space complexity. *BMC Bioinformatics.* 2004;5: 113. pmid: 15318951
8. Altschul SF, Gish W, Miller W, Myers EW, Lipman DJ. Basic local alignment search tool. *J Mol Biol.* 1990;215: 403-410. pmid: 2231712
9. Smirnova E, Firth AE, Miller WA, Scheidecker D, Brault V, Reinbold C et al. Discovery of a small non-AUG-initiated ORF in poleroviruses and luteoviruses that is required for long-distance movement. *PLoS Pathog.* 2015;11: e1004868. pmid: 25946037
10. Sõmera M, Truve E. The genome organization of lucerne transient streak and turnip rosette sobemoviruses revisited. *Arch Virol.* 2013;158: 673-678. pmid: 23111554
